# Supplementary material for: Tenotomy-induced muscle atrophy is sex-specific and independent of NFκB
Source: eLife journal article supplement (doi:10.7554/elife.82016), 2022-12-12
Supplement: supp [file elife-82016-supp-v1.zip]

Archive with 21 entries (21 files):
- elife_poa_e82016_Figure_1_source_data_1.xlsx
- elife_poa_e82016_Figure_2_source_data_1.xlsx
- elife_poa_e82016_Figure_2_source_data_2.zip
- elife_poa_e82016_Figure_2_figure_supplement_1_source_data_1.xlsx
- elife_poa_e82016_Figure_2_figure_supplement_1_source_data_2.zip
- elife_poa_e82016_Figure_3_source_data_1.xlsx
- elife_poa_e82016_Figure_4_source_data_1.xlsx
- elife_poa_e82016_Figure_5_source_data_1.xlsx
- elife_poa_e82016_Figure_5_figure_supplement_1_source_data_1.xlsx
- elife_poa_e82016_Figure_6_source_data_1.xlsx
- elife_poa_e82016_Figure_7_source_data_1.xlsx
- elife_poa_e82016_Figure_7_source_data_2.zip
- elife_poa_e82016_Figure_7_figure_supplement_1_source_data_1.xlsx
- elife_poa_e82016_Figure_7_figure_supplement_1_source_data_2.zip
- elife_poa_e82016_Figure_7_figure_supplement_source_data_1.xlsx
- elife_poa_e82016_Figure_7_figure_supplement_2_source_data_2.zip
- elife_poa_e82016_Figure_2_figure_supplement_1.jpg
- elife_poa_e82016_Figure_5_figure_supplement_1.jpg
- elife_poa_e82016_Figure_7_figure_supplement_1.jpg
- elife_poa_e82016_Figure_7_figure_supplement_2.jpg
- elife_poa_e82016_Transparent_Reporting_File.pdf
