# Supplementary material for: Tenotomy-induced muscle atrophy is sex-specific and independent of NFκB
Source: eLife journal article supplement (doi:10.7554/elife.82016), 2022-12-12
Supplement: supp [file elife-82016-supp-v1.zip › elife_poa_e82016_Figure_1_source_data_1.xlsx]

## Sheet: FIG1A
Normalized Supraspinatus mass/Body mass; TEN																			Normalized Infraspinatus mass/Body mass; TEN
	WT																			WT
	MALE								FEMALE											MALE								FEMALE
W1	0.838335	0.806176	0.861498	0.904715	0.903556	0.799444	0.937176		0.806501	0.861826	0.900307	0.888684	0.974438	0.746932					W1	0.841955	0.847688	0.807929	0.892408	0.889477	0.849577	1.02299		0.908725	0.891769	0.864683	0.913153	0.907731	0.814171
W2	0.744106	0.809581	0.82415	0.85657	0.836792	0.890884			0.763708	0.852368	0.907558	0.729201	0.771554	0.86658	0.813895				W2	0.761644	0.878085	0.807941	0.790023	0.800771	1.01925			0.813299	0.705852	0.937194	0.755503	0.764482	0.796769	0.856111
W8	0.643631	0.675715	0.649103	0.700039	0.703807	0.720746	0.70603		0.802336	0.796032	0.805509	0.750629	0.768275	0.938397	0.735616				W8	0.612905	0.716771	0.657194	0.798418	0.715543	0.724215	0.601934		0.742416	0.753548	0.869564	0.854065	0.757486	0.894392	0.701339
Two-way ANOVA	Ordinary								Šídák's multiple comparisons test	Predicted (LS) mean diff.	95.00% CI of diff.	Below threshold?	Summary	Adjusted P Value					Two-way ANOVA	Ordinary								Šídák's multiple comparisons test	Predicted (LS) mean diff.	95.00% CI of diff.	Below threshold?	Summary	Adjusted P Value
Alpha	0.05																		Alpha	0.05
									MALE - FEMALE																			MALE - FEMALE
Source of Variation	% of total variation	P value	P value summary	Significant?					W1	0.0013	-0.08058 to 0.08318	No	ns	>0.9999					Source of Variation	% of total variation	P value	P value summary	Significant?					W1	-0.004511	-0.1056 to 0.09661	No	ns	0.9993
Interaction	12.53	0.0142	*	Yes					W2	0.01203	-0.06985 to 0.09392	No	ns	0.9767					Interaction	10.7	0.0381	*	Yes					W2	0.03878	-0.06235 to 0.1399	No	ns	0.7156
Time	38.57	<0.0001	****	Yes					W8	-0.114	-0.1926 to -0.03529	Yes	**	0.0027					Time	36.93	<0.0001	****	Yes					W8	-0.1065	-0.2037 to -0.009388	Yes	*	0.0279
Genotype	4.22	0.0799	ns	No															Genotype	1.637	0.3012	ns	No
ANOVA table	SS (Type III)	DF	MS	F (DFn, DFd)	P value				Test details	Predicted (LS) mean 1	Predicted (LS) mean 2	Predicted (LS) mean diff.	SE of diff.	N1	N2	t	DF		ANOVA table	SS (Type III)	DF	MS	F (DFn, DFd)	P value				Test details	Predicted (LS) mean 1	Predicted (LS) mean 2	Predicted (LS) mean diff.	SE of diff.	N1	N2	t	DF
Interaction	0.03322	2	0.01661	F (2, 34) = 4.835	P=0.0142														Interaction	0.03776	2	0.01888	F (2, 34) = 3.603	P=0.0381
Time	0.1023	2	0.05115	F (2, 34) = 14.89	P<0.0001				MALE - FEMALE										Time	0.1303	2	0.06514	F (2, 34) = 12.43	P<0.0001				MALE - FEMALE
Genotype	0.01119	1	0.01119	F (1, 34) = 3.258	P=0.0799				W1	0.8644	0.8631	0.0013	0.03261	7	6	0.03986	34		Genotype	0.005774	1	0.005774	F (1, 34) = 1.102	P=0.3012				W1	0.8789	0.8834	-0.004511	0.04027	7	6	0.112	34
Residual	0.1168	34	0.003435						W2	0.827	0.815	0.01203	0.03261	6	7	0.369	34		Residual	0.1781	34	0.00524						W2	0.843	0.8042	0.03878	0.04027	6	7	0.9629	34
									W8	0.6856	0.7995	-0.114	0.03133	7	7	3.637	34											W8	0.6896	0.7961	-0.1065	0.03869	7	7	2.754	34
Difference between column means																			Difference between column means
Predicted (LS) mean of MALE	0.7923																		Predicted (LS) mean of MALE	0.8038
Predicted (LS) mean of FEMALE	0.8259																		Predicted (LS) mean of FEMALE	0.8279
Difference between predicted means	-0.03354																		Difference between predicted means	-0.02409
SE of difference	0.01858																		SE of difference	0.02295
95% CI of difference	-0.07131 to 0.004224																		95% CI of difference	-0.07073 to 0.02255
																			Data summary
																			Number of columns (Genotype)	2
																			Number of rows (Time)	3
																			Number of values	40

## Sheet: FIG1B
Normalized Type 2B Fiber Area; SS TEN
	WT
	MALE								FEMALE
W1	0.966909	1.07413	1.07743	0.987498	1.00425	1.03553	1.01958		0.929803	0.750805	0.981264	1.23122	1.02351	1.1511	0.960318
W2	0.831159	0.937917	0.876999	1.06501	0.84631	0.885856			0.942539	0.907545	0.857138	0.888138	0.821088		1.06964
W8	0.895728	0.751343	0.784586	0.878538		0.787549	0.8687		0.912335	1.01444	1.17077	0.847949	1.08181	1.0357
Two-way ANOVA	Ordinary								Šídák's multiple comparisons test	Predicted (LS) mean diff.	95.00% CI of diff.	Below threshold?	Summary	Adjusted P Value
Alpha	0.05
									MALE - FEMALE
Source of Variation	% of total variation	P value	P value summary	Significant?					W1	0.01962	-0.1142 to 0.1535	No	ns	0.9767
Interaction	14.91	0.0328	*	Yes					W2	-0.007138	-0.1517 to 0.1374	No	ns	0.9991
Time	17.21	0.0206	*	Yes					W8	-0.1828	-0.3273 to -0.03818	Yes	**	0.0096
Genotype	6.032	0.0888	ns	No
ANOVA table	SS (Type III)	DF	MS	F (DFn, DFd)	P value				Test details	Predicted (LS) mean 1	Predicted (LS) mean 2	Predicted (LS) mean diff.	SE of diff.	N1	N2	t	DF
Interaction	0.07528	2	0.03764	F (2, 32) = 3.809	P=0.0328
Time	0.08684	2	0.04342	F (2, 32) = 4.394	P=0.0206				MALE - FEMALE
Genotype	0.03044	1	0.03044	F (1, 32) = 3.081	P=0.0888				W1	1.024	1.004	0.01962	0.05313	7	7	0.3692	32
Residual	0.3162	32	0.009881						W2	0.9072	0.9143	-0.007138	0.05739	6	6	0.1244	32
									W8	0.8277	1.01	-0.1828	0.05739	6	6	3.185	32
Difference between column means
Predicted (LS) mean of MALE	0.9195
Predicted (LS) mean of FEMALE	0.9763
Difference between predicted means	-0.05676
SE of difference	0.03234
95% CI of difference	-0.1226 to 0.009105
Data summary
Number of columns (Genotype)	2
Number of rows (Time)	3
Number of values	38

## Sheet: FIG1C
Normalized Total Fiber Number; SS TEN
	WT
	MALE								FEMALE
W1	0.795741	0.829888			0.933097	1.00254	1.02326		0.842162	0.896564	0.800286		0.981747	0.850752
W2	0.794974	0.915064	1.01981	0.703659	0.787684	0.909693			0.689692	0.566571	0.893701		0.91446	0.688618	0.975304
W8	1.10268	0.79766	0.90317	1.22009	0.890509	0.954199	0.663373		0.636006	0.566571	0.692198	0.896922		0.76378
Two-way ANOVA	Ordinary								Šídák's multiple comparisons test	Predicted (LS) mean diff.	95.00% CI of diff.	Below threshold?	Summary	Adjusted P Value
Alpha	0.05
									MALE - FEMALE
Source of Variation	% of total variation	P value	P value summary	Significant?					W1	0.0426	-0.1774 to 0.2626	No	ns	0.948
Interaction	7.424	0.2582	ns	No					W2	0.06709	-0.1337 to 0.2679	No	ns	0.7877
Time	5.321	0.374	ns	No					W8	0.222	0.01833 to 0.4257	Yes	*	0.0294
Genotype	14.22	0.027	*	Yes
ANOVA table	SS (Type III)	DF	MS	F (DFn, DFd)					Test details	Predicted (LS) mean 1	Predicted (LS) mean 2	Predicted (LS) mean diff.	SE of diff.	N1	N2	t	DF
Interaction	0.05336	2	0.02668	F (2, 28) = 1.422
Time	0.03824	2	0.01912	F (2, 28) = 1.019					MALE - FEMALE
Genotype	0.1022	1	0.1022	F (1, 28) = 5.448					W1	0.9169	0.8743	0.0426	0.08664	5	5	0.4917	28
Residual	0.5254	28	0.01877						W2	0.8551	0.7881	0.06709	0.07909	6	6	0.8483	28
									W8	0.9331	0.7111	0.222	0.08021	7	5	2.768	28
Difference between column means
Predicted (LS) mean of MALE	0.9017
Predicted (LS) mean of FEMALE	0.7912
Difference between predicted means	0.1106
SE of difference	0.04737
95% CI of difference	0.01353 to 0.2076
Data summary
Number of columns (Genotype)	2
Number of rows (Time)	3
Number of values	34

## Sheet: FIG1D
Normalized Predicted Fiber Length; SS TEN
	WT
	MALE								FEMALE
W2	0.724454	0.796131	0.868488	0.868488	0.868488		0.796131		0.5912	0.660983	0.876227		0.731939	0.731939	0.731939
W8	0.724454	0.796131	0.796131	0.724454		0.868488	0.724454		0.660983	0.5912	0.731939	0.660983	0.731939	0.660983	0.660983
Two-way ANOVA	Ordinary								Šídák's multiple comparisons test	Predicted (LS) mean diff.	95.00% CI of diff.	Below threshold?	Summary	Adjusted P Value
Alpha	0.05
									MALE - FEMALE
Source of Variation	% of total variation	P value	P value summary	Significant?					W2	0.09966	0.006810 to 0.1925	Yes	*	0.0343
Interaction	0.00177	0.9793	ns	No					W8	0.1011	0.01159 to 0.1905	Yes	*	0.0255
Time	8.499	0.0831	ns	No
Genotype	36.07	0.0012	**	Yes
									Test details	Predicted (LS) mean 1	Predicted (LS) mean 2	Predicted (LS) mean diff.	SE of diff.	N1	N2	t	DF
ANOVA table	SS (Type III)	DF	MS	F (DFn, DFd)	P value
Interaction	3.075e-06	1	3.075e-06	F (1, 21) = 0.0006894	P=0.9793				MALE - FEMALE
Time	0.01477	1	0.01477	F (1, 21) = 3.310	P=0.0831				W2	0.8204	0.7207	0.09966	0.03856	6	6	2.584	21
Genotype	0.06267	1	0.06267	F (1, 21) = 14.05	P=0.0012				W8	0.7724	0.6713	0.1011	0.03716	6	7	2.72	21
Residual	0.09368	21	0.004461
Difference between column means
Predicted (LS) mean of MALE	0.7964
Predicted (LS) mean of FEMALE	0.696
Difference between predicted means	0.1004
SE of difference	0.02678
95% CI of difference	0.04468 to 0.1560
Difference between row means
Predicted (LS) mean of W2	0.7705
Predicted (LS) mean of W8	0.7218
Difference between predicted means	0.04871
SE of difference	0.02678
95% CI of difference	-0.006968 to 0.1044
Interaction CI
Mean diff, A1 - B1	0.09966
Mean diff, A2 - B2	0.1011
(A1 -B1) - (A2 - B2)	-0.001406
95% CI of difference	-0.1128 to 0.1100
(B1 - A1) - (B2 - A2)	0.001406
95% CI of difference	-0.1100 to 0.1128
Data summary
Number of columns (Genotype)	2
Number of rows (Time)	2
Number of values	25

## Sheet: FIG1E
% Contribution to Mass Deficit (Predicted); SS TEN
	WT
	D FL						DF#						D CSA
MALE W2 WT	0.500186	0.569794	0.50604	0.393073	0.333197	0.340622	0.208539	0.168948	-0.0468844	0.389497	0.135794	0.21322	0.291275	0.261258	0.540845	0.21743	0.53101	0.446157
MALE W8 WT	1.1877	0.412529	0.425181	0.39822	0.315017		-0.427055	0.29168	0.190904	0.302255	0.400258		0.239355	0.295791	0.383915	0.299524	0.284724
FEMALE W2 WT	0.87443	0.250017		0.340408	0.709538		0.356089	1.28993		0.583342	0.0964337		-0.230519	-0.53995		0.0762505	0.194028
FEMALE W8 WT	0.485471	0.29441	0.607458	0.703301	0.828053	0.590238	0.556952	0.824582	0.789958	0.468459	0.35936	0.589061	-0.042423	-0.118992	-0.397416	-0.17176	-0.187412	-0.179298

## Sheet: FIG1F
Predicted vs Measured Mass Deficit; SS TEN
	WT
	Measured Mass Deficit	Predicted Mass Deficit
	12.05	21.895
	15.75	25.5244
	13.55	21.6417
	3.45	18.6361
	10.45	21.9851
	15.45	21.5058
	13.15	12.2452
	17.25	30.2549
	11.55	25.7574
	13.55	27.5012
	14.45	23.2538
	3.775	11.3959
	5.275	3.1141
	7.475	20.3774
	5.875	9.77626
	11.7	27.1222
	7.7	21.8138
	11.6	16.1702
	7.9	9.13151
	11.4	11.8625
	10.5	16.642
Simple Linear Regression
Best-fit values
Slope	1.153
Y-intercept	6.648
X-intercept	-5.768
1/slope	0.8676
Std. Error
Slope	0.3176
Y-intercept	3.6
95% Confidence Intervals
Slope	0.4879 to 1.817
Y-intercept	-0.8871 to 14.18
X-intercept	-28.41 to 0.4996
Goodness of Fit
R squared	0.4094
Sy.x	5.615
Is slope significantly non-zero?
F	13.17
DFn, DFd	1, 19
P value	0.0018
Deviation from zero?	Significant
Equation	Y = 1.153*X + 6.648
Data
Number of X values	21
Maximum number of Y replicates	1
Total number of values	21
Number of missing values	0
