# Supplementary material for: Tenotomy-induced muscle atrophy is sex-specific and independent of NFκB
Source: eLife journal article supplement (doi:10.7554/elife.82016), 2022-12-12
Supplement: supp [file elife-82016-supp-v1.zip › elife_poa_e82016_Figure_2_figure_supplement_1_source_data_1.xlsx]

## Sheet: FIG2S1
P50/Histone H3
	CTL	ECC	SHM
	0.162424	1.624	0.124648
			0.339496
