# Supplementary material for: Tenotomy-induced muscle atrophy is sex-specific and independent of NFκB
Source: eLife journal article supplement (doi:10.7554/elife.82016), 2022-12-12
Supplement: supp [file elife-82016-supp-v1.zip › elife_poa_e82016_Figure_2_source_data_1.xlsx]

## Sheet: FIG2A
Relative Ikbkb Expression; W1															Relative Ikbkb Expression; W8
	MALE															MALE
	WT							IKKmkd								WT							IKKmkd
SHM	0.920513	0.990077	0.97256	1.11685	1			0.641132	0.617485	0.489776	0.403445	0.689676			SHM	0.804535	1.31531	1.10072	0.896978	0.940959	1.06716		0.622607	0.686355	0.603542	0.633161	0.592341	0.515431
TEN	1.19412	1.36416	1.43755	1.39017	1.2427	1.49042		0.829166	0.577792	0.60445	0.562417	0.459578	0.53304		TEN	1.46678	1.62506	1.72728	1.84175	1.22991	1.21553		0.528875	0.564406	0.571398	0.939943	0.420193	0.668535
	FEMALE															FEMALE
	WT							IKKmkd								WT							IKKmkd
SHM	0.770421	0.778313	1.21662	0.855244	1.3794			0.379333	0.338311	0.282975	0.310644		0.456475		SHM	1.02146	0.912132	0.980285	0.955507	1.09957	1.03104		0.391513	0.358989	0.552595	0.629492	0.747894	0.661089
TEN	0.870776	1.03865	0.98879	1.27071	1.29442	1.51411		0.490227	0.364559	0.396148	0.537306	0.442596	0.479855		TEN	1.09325	1	1.03336	1.089	0.902166	1.07736		0.490522	0.398705	0.418943	0.487009	0.525924	0.446971
Three-way ANOVA	Ordinary							Šídák's multiple comparisons test	Mean Diff.	95.00% CI of diff.	Below threshold?	Summary	Adjusted P Value		Three-way ANOVA	Ordinary							Šídák's multiple comparisons test	Mean Diff.	95.00% CI of diff.	Below threshold?	Summary	Adjusted P Value
Alpha	0.05														Alpha	0.05
								SHM:WT Male vs. TEN:WT Male	-0.3532	-0.6380 to -0.06835	Yes	**	0.0068										SHM:WT Male vs. TEN:WT Male	-0.5044	-0.7380 to -0.2707	Yes	****	<0.0001
Source of Variation	% of total variation	P value	P value summary	Significant?				SHM:IKK Male vs. TEN:IKK Male	-0.0261	-0.3109 to 0.2587	No	ns	>0.9999		Source of Variation	% of total variation	P value	P value summary	Significant?				SHM:IKK Male vs. TEN:IKK Male	-0.006652	-0.2590 to 0.2457	No	ns	>0.9999
Treatment	4.574	0.0015	**	Yes				SHM:WT Female vs. TEN:WT Female	-0.1629	-0.4477 to 0.1219	No	ns	0.6755		Treatment	2.472	0.0084	**	Yes				SHM:WT Female vs. TEN:WT Female	-0.03809	-0.2905 to 0.2143	No	ns	>0.9999
Sex	3.345	0.0058	**	Yes				SHM:IKK Female vs. TEN:IKK Female	-0.09823	-0.3831 to 0.1866	No	ns	0.9861		Sex	5.436	0.0002	***	Yes				SHM:IKK Female vs. TEN:IKK Female	0.09558	-0.1568 to 0.3480	No	ns	0.9725
Genotype	72.4	<0.0001	****	Yes				SHM:WT Male vs. SHM:IKK Male	0.4317	0.1342 to 0.7292	Yes	**	0.001		Genotype	63.57	<0.0001	****	Yes				SHM:WT Male vs. SHM:IKK Male	0.3911	0.1479 to 0.6343	Yes	***	0.0002
Treatment x Sex	0.1557	0.5309	ns	No				SHM:WT Female vs. SHM:IKK Female	0.6465	0.3489 to 0.9440	Yes	****	<0.0001		Treatment x Sex	3.885	0.0012	**	Yes				SHM:WT Female vs. SHM:IKK Female	0.4431	0.1907 to 0.6954	Yes	****	<0.0001
Treatment x Genotype	1.711	0.043	*	Yes				TEN:WT Male vs. TEN:IKK Male	0.7588	0.4872 to 1.030	Yes	****	<0.0001		Treatment x Genotype	4.792	0.0004	***	Yes				TEN:WT Male vs. TEN:IKK Male	0.8888	0.6456 to 1.132	Yes	****	<0.0001
Sex x Genotype	0.3114	0.3768	ns	No				TEN:WT Female vs. TEN:IKK Female	0.7111	0.4395 to 0.9827	Yes	****	<0.0001		Sex x Genotype	0.8131	0.1203	ns	No				TEN:WT Female vs. TEN:IKK Female	0.5767	0.3244 to 0.8291	Yes	****	<0.0001
Treatment x Sex x Genotype	0.7678	0.1685	ns	No				SHM:WT Male vs. SHM:WT Female	0	-0.2975 to 0.2975	No	ns	>0.9999		Treatment x Sex x Genotype	1.593	0.0319	*	Yes				SHM:WT Male vs. SHM:WT Female	3.095e-09	-0.2432 to 0.2432	No	ns	>0.9999
								SHM:IKK Male vs. SHM:IKK Female	0.2148	-0.08275 to 0.5123	No	ns	0.3408										SHM:IKK Male vs. SHM:IKK Female	0.05198	-0.2004 to 0.3044	No	ns	>0.9999
ANOVA table	SS (Type III)	DF	MS	F (DFn, DFd)	P value			TEN:WT Male vs. TEN:WT Female	0.1903	-0.08131 to 0.4619	No	ns	0.3828		ANOVA table	SS (Type III)	DF	MS	F (DFn, DFd)	P value			TEN:WT Male vs. TEN:WT Female	0.4663	0.2231 to 0.7095	Yes	****	<0.0001
Treatment	0.2797	1	0.2797	F (1, 36) = 11.76	P=0.0015			TEN:IKK Male vs. TEN:IKK Female	0.1426	-0.1290 to 0.4142	No	ns	0.7779		Treatment	0.16	1	0.16	F (1, 42) = 7.646	P=0.0084			TEN:IKK Male vs. TEN:IKK Female	0.1542	-0.09816 to 0.4066	No	ns	0.5914
Sex	0.2045	1	0.2045	F (1, 36) = 8.603	P=0.0058										Sex	0.3517	1	0.3517	F (1, 42) = 16.81	P=0.0002
Genotype	4.427	1	4.427	F (1, 36) = 186.2	P<0.0001										Genotype	4.113	1	4.113	F (1, 42) = 196.6	P<0.0001
Treatment x Sex	0.009517	1	0.009517	F (1, 36) = 0.4004	P=0.5309										Treatment x Sex	0.2514	1	0.2514	F (1, 42) = 12.01	P=0.0012
Treatment x Genotype	0.1046	1	0.1046	F (1, 36) = 4.402	P=0.0430										Treatment x Genotype	0.3101	1	0.3101	F (1, 42) = 14.82	P=0.0004
Sex x Genotype	0.01904	1	0.01904	F (1, 36) = 0.8009	P=0.3768										Sex x Genotype	0.05262	1	0.05262	F (1, 42) = 2.515	P=0.1203
Treatment x Sex x Genotype	0.04695	1	0.04695	F (1, 36) = 1.975	P=0.1685										Treatment x Sex x Genotype	0.1031	1	0.1031	F (1, 42) = 4.927	P=0.0319
Residual	0.8557	36	0.02377												Residual	0.8788	42	0.02092

## Sheet: FIG2B
Relative Ikbkb Expression; W8
	MALE
	WT								IKKmca
SHM	0.883538	1.22866	1.1487	0.984056	0.908101	1.04673	0.80022		1.91923	2.96408	4.79074	3.12139	2.06891	1.47587
TEN	1.05671	0.69286	0.985181	1.93297	1.10367	1.02781	0.699009		1.50411	1.90515	2.33627	4.10577	4.10577	2.35327
	FEMALE
	WT								IKKmca
SHM	1.18588	1.23133	0.986978	1.08976	0.768158	0.737894			4.44862	3.56607	2.38912	3.07546	2.9171	2.64106	2.97547
TEN	0.707943	0.581705	1.4441	1.36003	1.81595	0.924863	1.41813		1.24238	3.52332	4.34542	3.91226	3.29411	2.81479	3.40541
Three-way ANOVA	Ordinary								Šídák's multiple comparisons test	Mean Diff.	95.00% CI of diff.	Below threshold?	Summary	Adjusted P Value
Alpha	0.05
									SHM:WT Male vs. TEN:WT Male	-0.07117	-1.264 to 1.122	No	ns	>0.9999
Source of Variation	% of total variation	P value	P value summary	Significant?					SHM:IKK Male vs. TEN:IKK Male	0.004981	-1.283 to 1.293	No	ns	>0.9999
Treatment	0.1136	0.697	ns	No					SHM:WT Female vs. TEN:WT Female	-0.179	-1.421 to 1.063	No	ns	>0.9999
Sex	1.177	0.2137	ns	No					SHM:IKK Female vs. TEN:IKK Female	-0.07497	-1.268 to 1.118	No	ns	>0.9999
Genotype	63.27	<0.0001	****	Yes					SHM:WT Male vs. SHM:IKK Male	-1.723	-2.965 to -0.4818	Yes	**	0.0016
Treatment x Sex	0.03906	0.8193	ns	No					SHM:WT Female vs. SHM:IKK Female	-2.145	-3.386 to -0.9031	Yes	****	<0.0001
Treatment x Genotype	0.03597	0.8265	ns	No					TEN:WT Male vs. TEN:IKK Male	-1.647	-2.889 to -0.4056	Yes	**	0.0028
Sex x Genotype	0.7358	0.3239	ns	No					TEN:WT Female vs. TEN:IKK Female	-2.041	-3.234 to -0.8478	Yes	****	<0.0001
Treatment x Sex x Genotype	0.0008588	0.973	ns	No					SHM:WT Male vs. SHM:WT Female	-2.381e-10	-1.242 to 1.242	No	ns	>0.9999
									SHM:IKK Male vs. SHM:IKK Female	-0.4213	-1.663 to 0.8203	No	ns	0.9888
ANOVA table	SS (Type III)	DF	MS	F (DFn, DFd)	P value				TEN:WT Male vs. TEN:WT Female	-0.1078	-1.301 to 1.085	No	ns	>0.9999
Treatment	0.08439	1	0.08439	F (1, 45) = 0.1536	P=0.6970				TEN:IKK Male vs. TEN:IKK Female	-0.5013	-1.743 to 0.7403	No	ns	0.9569
Sex	0.8744	1	0.8744	F (1, 45) = 1.591	P=0.2137
Genotype	47.02	1	47.02	F (1, 45) = 85.56	P<0.0001
Treatment x Sex	0.02903	1	0.02903	F (1, 45) = 0.05282	P=0.8193
Treatment x Genotype	0.02673	1	0.02673	F (1, 45) = 0.04863	P=0.8265
Sex x Genotype	0.5468	1	0.5468	F (1, 45) = 0.9950	P=0.3239
Treatment x Sex x Genotype	0.0006382	1	0.0006382	F (1, 45) = 0.001161	P=0.9730
Residual	24.73	45	0.5495

## Sheet: FIG2C
IKKβ/Actin; W1
	MALE
	WT							IKKmkd
SHM	0.061424	0.101566	0.0597336	0.0898305	0.067931			0.024918	0.0547307	0.0272727
TEN	0.0613982	0.0920998	0.0566917	0.0731043	0.139891			0.0250384	0.0214866	0.0297059	0.047093
	FEMALE
	WT							IKKmkd
SHM	0.0314985	0.0537944	0.0631944	0.0731481	0.0655303			0.0260305	0.0251917	0.0272273	0.00727023
TEN	0.0363801	0.0392366	0.0594978	0.0410145	0.0633862			0.0238328	0.0195719	0.0154994	0.0204112	0.0194483	0.0286385
Three-way ANOVA	Ordinary							Šídák's multiple comparisons test	Mean Diff.	95.00% CI of diff.	Below threshold?	Summary	Adjusted P Value
Alpha	0.05
								SHM:WT Male vs. TEN:WT Male	-0.00854	-0.04293 to 0.02585	No	ns	0.9992
Source of Variation	% of total variation	P value	P value summary	Significant?				SHM:IKK Male vs. TEN:IKK Male	0.00481	-0.03672 to 0.04634	No	ns	>0.9999
Treatment	0.0694	0.8006	ns	No				SHM:WT Female vs. TEN:WT Female	0.00953	-0.02486 to 0.04392	No	ns	0.9977
Sex	12.11	0.0022	**	Yes				SHM:IKK Female vs. TEN:IKK Female	0.0001962	-0.03491 to 0.03530	No	ns	>0.9999
Genotype	47.54	<0.0001	****	Yes				SHM:WT Male vs. SHM:IKK Male	0.04046	0.0007424 to 0.08017	Yes	*	0.0433
Treatment x Sex	0.3495	0.5717	ns	No				SHM:WT Female vs. SHM:IKK Female	0.036	-0.0004766 to 0.07248	No	ns	0.0552
Treatment x Genotype	0.03112	0.8657	ns	No				TEN:WT Male vs. TEN:IKK Male	0.05381	0.01733 to 0.09029	Yes	***	0.001
Sex x Genotype	1.926	0.1898	ns	No				TEN:WT Female vs. TEN:IKK Female	0.02667	-0.006260 to 0.05960	No	ns	0.1943
Treatment x Sex x Genotype	0.9932	0.3429	ns	No				SHM:WT Male vs. SHM:WT Female	0.01866	-0.01573 to 0.05306	No	ns	0.7291
								SHM:IKK Male vs. SHM:IKK Female	0.01421	-0.02732 to 0.05574	No	ns	0.9855
ANOVA table	SS (Type III)	DF	MS	F (DFn, DFd)	P value			TEN:WT Male vs. TEN:WT Female	0.03673	0.002340 to 0.07113	Yes	*	0.0294
Treatment	1.997e-05	1	1.997e-05	F (1, 29) = 0.06496	P=0.8006			TEN:IKK Male vs. TEN:IKK Female	0.009597	-0.02551 to 0.04470	No	ns	0.998
Sex	0.003485	1	0.003485	F (1, 29) = 11.33	P=0.0022
Genotype	0.01368	1	0.01368	F (1, 29) = 44.50	P<0.0001
Treatment x Sex	0.0001006	1	0.0001006	F (1, 29) = 0.3272	P=0.5717
Treatment x Genotype	8.958e-06	1	8.958e-06	F (1, 29) = 0.02913	P=0.8657
Sex x Genotype	0.0005544	1	0.0005544	F (1, 29) = 1.803	P=0.1898
Treatment x Sex x Genotype	0.0002858	1	0.0002858	F (1, 29) = 0.9296	P=0.3429
Residual	0.008917	29	0.0003075

## Sheet: FIG2D
IKKβ/Actin; W8
	MALE
	WT							IKKmca
SHM	0.0828877	0.0851582	0.0612414	0.0745981	0.0585766	0.0525292		0.221811	0.19759	0.178051	0.107706	0.100885
TEN	0.0375556	0.0717893	0.113399	0.057451	0.0587549	0.0815455		0.16245	0.251485	0.170358	0.137209
	FEMALE
	WT							IKKmca
SHM	0.0582313	0.0649558	0.0772414					0.201961	0.148462	0.170072	0.106612	0.142045
TEN	0.0540016	0.0556863	0.0591696	0.0634228	0.0320714			0.0983539	0.160138	0.126515	0.308439
Three-way ANOVA	Ordinary							Šídák's multiple comparisons test	Mean Diff.	95.00% CI of diff.	Below threshold?	Summary	Adjusted P Value
Alpha	0.05
								SHM:WT Male vs. TEN:WT Male	-0.0009173	-0.07764 to 0.07581	No	ns	>0.9999
Source of Variation	% of total variation	P value	P value summary	Significant?				SHM:IKK Male vs. TEN:IKK Male	-0.01917	-0.1083 to 0.06998	No	ns	0.9998
Treatment	0.2405	0.6563	ns	No				SHM:WT Female vs. TEN:WT Female	0.01394	-0.08311 to 0.1110	No	ns	>0.9999
Sex	0.4208	0.5566	ns	No				SHM:IKK Female vs. TEN:IKK Female	-0.01953	-0.1087 to 0.06962	No	ns	0.9998
Genotype	61.28	<0.0001	****	Yes				SHM:WT Male vs. SHM:IKK Male	-0.09204	-0.1725 to -0.01157	Yes	*	0.0159
Treatment x Sex	0.07662	0.8014	ns	No				SHM:WT Female vs. SHM:IKK Female	-0.08702	-0.1841 to 0.01003	No	ns	0.1078
Treatment x Genotype	0.9759	0.3724	ns	No				TEN:WT Male vs. TEN:IKK Male	-0.1103	-0.1961 to -0.02451	Yes	**	0.0049
Sex x Genotype	0.009771	0.9284	ns	No				TEN:WT Female vs. TEN:IKK Female	-0.1205	-0.2096 to -0.03134	Yes	**	0.0028
Treatment x Sex x Genotype	0.08452	0.7917	ns	No				SHM:WT Male vs. SHM:WT Female	0.002356	-0.09162 to 0.09633	No	ns	>0.9999
								SHM:IKK Male vs. SHM:IKK Female	0.007379	-0.07667 to 0.09143	No	ns	>0.9999
ANOVA table	SS (Type III)	DF	MS	F (DFn, DFd)	P value			TEN:WT Male vs. TEN:WT Female	0.01721	-0.06326 to 0.09768	No	ns	0.9998
Treatment	0.0003732	1	0.0003732	F (1, 30) = 0.2021	P=0.6563			TEN:IKK Male vs. TEN:IKK Female	0.007014	-0.08696 to 0.1010	No	ns	>0.9999
Sex	0.0006528	1	0.0006528	F (1, 30) = 0.3535	P=0.5566
Genotype	0.09508	1	0.09508	F (1, 30) = 51.49	P<0.0001
Treatment x Sex	0.0001189	1	0.0001189	F (1, 30) = 0.06437	P=0.8014
Treatment x Genotype	0.001514	1	0.001514	F (1, 30) = 0.8199	P=0.3724
Sex x Genotype	1.516e-05	1	1.516e-05	F (1, 30) = 0.008209	P=0.9284
Treatment x Sex x Genotype	0.0001311	1	0.0001311	F (1, 30) = 0.07101	P=0.7917
Residual	0.0554	30	0.001847

## Sheet: FIG2E
p50/Histone H3; W1																p65/Histone H3; W1
	MALE and FEMALE																MALE and FEMALE
	WT								IKKmkd								WT								IKKmkd
SHM	0.139241	0.0704819	0.182803	0.242055	0.339496	0.219917			0.0458702	0.0144717	0.0968586	0.103107	0.0741477			SHM	0.0110127	0.0435241	0.0442675	0.0376606	0.0229412				0.00181416	0.00422604	0.0215707	0.0139831	0.0251136
TEN	0.199108	0.104713	0.127723	0.125121	0.223285	0.368479	0.274559		0.0201128		0.0788991	0.0420833	0.124648	0.0970674		TEN	0.0194651	0.0185041	0.0434158	0.0466184	0.0246412	0.0491676			0.00347742		0.0236238	0.005625	0.0112676
Two-way ANOVA	Ordinary								Šídák's multiple comparisons test	Predicted (LS) mean diff.	95.00% CI of diff.	Below threshold?	Summary	Adjusted P Value		Two-way ANOVA	Ordinary								Šídák's multiple comparisons test	Predicted (LS) mean diff.	95.00% CI of diff.	Below threshold?	Summary	Adjusted P Value
Alpha	0.05															Alpha	0.05
									WT - IKK																WT - IKK
Source of Variation	% of total variation	P value	P value summary	Significant?					W1	0.1321	0.02068 to 0.2435	Yes	*	0.0192		Source of Variation	% of total variation	P value	P value summary	Significant?					W1	0.01854	-0.001044 to 0.03812	No	ns	0.0647
Interaction	0.001306	0.9829	ns	No					W8	0.1307	0.02298 to 0.2385	Yes	*	0.0166		Interaction	0.444	0.7227	ns	No					W8	0.02264	0.002650 to 0.04262	Yes	*	0.0259
Treatment	0.06743	0.8777	ns	No												Treatment	0.009172	0.9592	ns	No
Genotype	46.99	0.0006	***	Yes												Genotype	44.84	0.0023	**	Yes
ANOVA table	SS (Type III)	DF	MS	F (DFn, DFd)	P value											ANOVA table	SS (Type III)	DF	MS	F (DFn, DFd)	P value
Interaction	2.706e-06	1	2.706e-06	F (1, 19) = 0.0004709	P=0.9829											Interaction	2.056e-05	1	2.056e-05	F (1, 16) = 0.1304	P=0.7227
Treatment	0.0001397	1	0.0001397	F (1, 19) = 0.02431	P=0.8777											Treatment	4.247e-07	1	4.247e-07	F (1, 16) = 0.002695	P=0.9592
Genotype	0.09736	1	0.09736	F (1, 19) = 16.94	P=0.0006											Genotype	0.002076	1	0.002076	F (1, 16) = 13.17	P=0.0023
Residual	0.1092	19	0.005747													Residual	0.002522	16	0.0001576
Difference between column means																Difference between column means
Predicted (LS) mean of WT	0.2011															Predicted (LS) mean of WT	0.03276
Predicted (LS) mean of IKK	0.06973															Predicted (LS) mean of IKK	0.01217
Difference between predicted means	0.1314															Difference between predicted means	0.02059
SE of difference	0.03193															SE of difference	0.005672
95% CI of difference	0.06459 to 0.1982															95% CI of difference	0.008563 to 0.03261
Difference between row means																Difference between row means
Predicted (LS) mean of W1	0.1329															Predicted (LS) mean of W1	0.02261
Predicted (LS) mean of W8	0.1379															Predicted (LS) mean of W8	0.02232
Difference between predicted means	-0.004978															Difference between predicted means	0.0002944
SE of difference	0.03193															SE of difference	0.005672
95% CI of difference	-0.07180 to 0.06185															95% CI of difference	-0.01173 to 0.01232
Interaction CI																Interaction CI
Mean diff, A1 - B1	0.1321															Mean diff, A1 - B1	0.01854
Mean diff, A2 - B2	0.1307															Mean diff, A2 - B2	0.02264
(A1 -B1) - (A2 - B2)	0.001386															(A1 -B1) - (A2 - B2)	-0.004097
95% CI of difference	-0.1323 to 0.1350															95% CI of difference	-0.02815 to 0.01995
(B1 - A1) - (B2 - A2)	-0.001386															(B1 - A1) - (B2 - A2)	0.004097
95% CI of difference	-0.1350 to 0.1323															95% CI of difference	-0.01995 to 0.02815
Data summary																Data summary
Number of columns (Genotype)	2															Number of columns (Genotype)	2
Number of rows (Treatment)	2															Number of rows (Treatment)	2
Number of values	23															Number of values	20
