# Supplementary material for: Tenotomy-induced muscle atrophy is sex-specific and independent of NFκB
Source: eLife journal article supplement (doi:10.7554/elife.82016), 2022-12-12
Supplement: supp [file elife-82016-supp-v1.zip › elife_poa_e82016_Figure_3_source_data_1.xlsx]

## Sheet: FIG3A
Supraspinatus mass/Body mass; SHM																	Supraspinatus mass/Body mass; TEN
	MALE																	MALE
	WT								IKKmkd									WT								IKKmkd
W1	1.55907	1.69108	1.54162	1.61489	1.55093				1.59375	1.58892	1.52564	1.53333	1.50299				W1	1.33422	1.28304	1.37109	1.43987	1.43802	1.27233	1.49153		1.39269	1.40393	1.50168	1.53534	1.51352	1.53309
W2	1.6357	1.57042	1.50786	1.54162	1.53614	1.53749			1.66785	1.5873	1.71599	1.7314	1.67331	1.69875	1.48387		W2	1.18426	1.28846	1.31165	1.36325	1.33177	1.41786			1.21349	1.43805	1.39225	1.43814	1.38928	1.51612	1.4747
W8	1.58698	1.61003	1.50359	1.57853	1.55398	1.57208			1.63561	1.62151	1.57163	1.63704	1.67438				W8	1.02435	1.07541	1.03306	1.11412	1.12012	1.14708	1.12366		1.10219	0.987097	1.05225	1.06476	1.31831	1.09605	1.13789
	FEMALE																	FEMALE
	WT								IKKmkd									WT								IKKmkd
W1	1.53563	1.49262	1.61581	1.57702	1.43202				1.58479	1.68086	1.53253	1.60346	1.66012	1.35791			W1	1.23445	1.31913	1.37803	1.36024	1.49149		1.14327		1.4723	1.42795	1.47325	1.34503	1.48098	1.49579	1.46238
W2	1.56831	1.56831	1.64119	1.55961	1.58691				1.76616	1.6469	1.70016	1.88472	1.65776	1.87161			W2	1.16895	1.30465	1.38912	1.11613	1.18096	1.3264	1.24576		1.27335	1.37323	1.49804	1.31321	1.16146	1.54616
W8	1.54698	1.41265	1.75292	1.69032	1.48023	1.65217	1.61553		1.86349	1.65678	1.67366	1.53368	1.9216	1.94824			W8	1.22807	1.21842	1.23293	1.14893	1.17594	1.43633	1.12595		1.33318	1.27032	1.19026	1.23775	1.29453	1.5581
Three-way ANOVA	Ordinary								Original FDR method of Benjamini and Hochberg	Q: 5%							Three-way ANOVA	Ordinary								Original FDR method of Benjamini and Hochberg	Q: 5%
Alpha	0.05										Discovery?	P value	q value				Alpha	0.05										Discovery?	P value	q value
									M	W1	No	0.23654	0.425771													M	W1	No	0.0310473	0.079836
Source of Variation	% of total variation	P value	P value summary	Significant?						W2	No	0.033016	0.10468				Source of Variation	% of total variation	P value	P value summary	Significant?						W2	No	0.0885067	0.19914
Time	10.2	0.0072	**	Yes						W8	No	0.0234546	0.10468				Time	38.91	<0.0001	****	Yes						W8	No	0.696966	0.696966
Sex	3.662	0.0541	ns	No					F	W1	No	0.529418	0.67521				Sex	0.5938	0.2948	ns	No					F	W1	No	0.0245929	0.0746579
Genotype	14.11	0.0003	***	Yes						W2	No	0.00306385	0.0551493				Genotype	9.357	<0.0001	****	Yes						W2	No	0.119304	0.232607
Time x Sex	3.847	0.1406	ns	No						W8	No	0.0533018	0.119929				Time x Sex	12.19	<0.0001	****	Yes						W8	No	0.187027	0.25896
Time x Genotype	7.111	0.0294	*	Yes					M WT	W1-W2	No	0.284608	0.465722				Time x Genotype	0.8395	0.4589	ns	No					M WT	W1-W2	No	0.217035	0.279045
Sex x Genotype	4.15	0.0408	*	Yes						W1-W8	No	0.446147	0.617742				Sex x Genotype	0.445	0.3639	ns	No						W1-W8	Yes	4.9331e-06	8.87958e-05
Time x Sex x Genotype	0.136	0.9309	ns	No						W2-W8	No	0.600187	0.67521				Time x Sex x Genotype	0.1572	0.863	ns	No						W2-W8	Yes	5.429e-05	0.00032574
									M KO	W1-W2	No	0.0362636	0.10468													M KO	W1-W2	No	0.155072	0.232607
ANOVA table	SS (Type III)	DF	MS	F (DFn, DFd)	P value					W1-W8	No	0.0121008	0.097472				ANOVA table	SS (Type III)	DF	MS	F (DFn, DFd)	P value					W1-W8	Yes	1.1066e-05	9.9594e-05
Time	0.08642	2	0.04321	F (2, 58) = 5.383	P=0.0072					W2-W8	No	0.592482	0.67521				Time	0.6809	2	0.3404	F (2, 67) = 36.53	P<0.0001					W2-W8	Yes	0.00011759	0.000529155
Sex	0.03102	1	0.03102	F (1, 58) = 3.864	P=0.0541				F WT	W1-W2	No	0.142425	0.28485				Sex	0.01039	1	0.01039	F (1, 67) = 1.115	P=0.2948				F WT	W1-W2	No	0.249258	0.29911
Genotype	0.1195	1	0.1195	F (1, 58) = 14.89	P=0.0003					W1-W8	No	0.327547	0.491321				Genotype	0.1638	1	0.1638	F (1, 67) = 17.57	P<0.0001					W1-W8	No	0.143648	0.232607
Time x Sex	0.03258	2	0.01629	F (2, 58) = 2.030	P=0.1406					W2-W8	No	0.834007	0.883066				Time x Sex	0.2134	2	0.1067	F (2, 67) = 11.45	P<0.0001					W2-W8	No	0.666521	0.696966
Time x Genotype	0.06024	2	0.03012	F (2, 58) = 3.752	P=0.0294				F KO	W1-W2	No	0.0162453	0.097472				Time x Genotype	0.01469	2	0.007345	F (2, 67) = 0.7881	P=0.4589				F KO	W1-W2	No	0.14697	0.232607
Sex x Genotype	0.03515	1	0.03515	F (1, 58) = 4.379	P=0.0408					W1-W8	No	0.0407088	0.10468				Sex x Genotype	0.007788	1	0.007788	F (1, 67) = 0.8356	P=0.3639					W1-W8	No	0.024886	0.0746579
Time x Sex x Genotype	0.001152	2	0.0005759	F (2, 58) = 0.07174	P=0.9309					W2-W8	No	0.887883	0.887883				Time x Sex x Genotype	0.002752	2	0.001376	F (2, 67) = 0.1476	P=0.8630					W2-W8	No	0.56517	0.635816
Residual	0.4656	58	0.008028														Residual	0.6244	67	0.00932

## Sheet: FIG3B
Infraspinatus mass/Body mass; SHM																	Infraspinatus mass/Body mass; TEN
	MALE																	MALE
	WT								IKKmkd									WT								IKKmkd
W1	1.18301	1.27497	1.18013	1.15534	1.04012				1.16776	1.12828	1.15619	1.12982	1.16467				W1	0.982322	0.989011	0.942623	1.04119	1.03777	0.991215	1.19354		0.969442	0.942891	1.10606	1.19611	1.06712	1.07156
W2	1.13115	1.21391	1.19025	1.11786	1.12871	1.07722			1.17052	1.29252	1.28401	1.18315	1.29635	1.26416	1.09531		W2	0.888622	1.02448	0.942637	0.921732	0.934272	1.18917			0.811396	0.933682	1.05327	1.01403	0.967913	1.11694	1.17258
W8	1.08871	1.20673	1.12052	1.16667	1.13068	1.15933			1.18979	1.21363	1.22779	1.16686	1.13889				W8	0.715085	0.836268	0.766758	0.768788	0.834835	0.844954	0.702286		0.644769	0.820645	0.733205	0.768072	0.822535	0.724785	0.763975
	FEMALE																	FEMALE
	WT								IKKmkd									WT								IKKmkd
W1	1.13091	1.08118	1.16002	1.13488	1.01167				1.14908	1.13402	1.22217	1.10955	1.13752	0.979836			W1	1.00299	0.984272	0.954376	1.00787	1.00189		0.898625		1.05898	1.09592	1.02675	0.883941	0.923913	1.09932	1.12115
W2	0.998383	1.18197	1.17622	1.10197	1.10225				1.28762	1.0775	1.3187	1.19603	1.212	1.12794			W2	0.897662	0.77907	1.03441	0.833871	0.843782	0.879418	0.944915		0.894014	1.03854	0.795901	1.04747	0.906213	1.07776
W8	1.0466	1.03523	1.30739	1.2129	1.09904	1.2029	1.17424		1.19443	1.04982	1.16611	1.09672	1.26758	1.31263			W8	0.819427	0.831714	0.942657	0.959764	0.83606	0.987167	0.774089		1.00046	0.816938	0.97178	0.957046	0.793243	1.07961
Three-way ANOVA	Ordinary								Original FDR method of Benjamini and Hochberg	Q: 5%							Three-way ANOVA	Ordinary								Original FDR method of Benjamini and Hochberg	Q: 5%
Alpha	0.05										Discovery?	P value	q value				Alpha	0.05										Discovery?	P value	q value
									M	W1	No	0.664461	0.785038													M	W1	No	0.501784	0.60214
Source of Variation	% of total variation	P value	P value summary	Significant?						W2	No	0.0457712	0.390189				Source of Variation	% of total variation	P value	P value summary	Significant?						W2	No	0.689033	0.763956
Time	4.186	0.2243	ns	No						W8	No	0.107913	0.390189				Time	37.37	<0.0001	****	Yes						W8	No	0.413608	0.576019
Sex	2.395	0.1904	ns	No					F	W1	No	0.680374	0.785038				Sex	0.131	0.6533	ns	No					F	W1	No	0.207187	0.414374
Genotype	7.088	0.0264	*	Yes						W2	No	0.108386	0.390189				Genotype	2.071	0.0773	ns	No						W2	No	0.206715	0.414374
Time x Sex	1.539	0.572	ns	No						W8	No	0.631783	0.785038				Time x Sex	13.9	<0.0001	****	Yes						W8	No	0.303516	0.496662
Time x Genotype	5.384	0.1483	ns	No					M WT	W1-W2	No	0.578334	0.785038				Time x Genotype	0.3594	0.7572	ns	No					M WT	W1-W2	No	0.448015	0.576019
Sex x Genotype	0.09718	0.7905	ns	No						W1-W8	No	0.595934	0.785038				Sex x Genotype	1.015	0.2136	ns	No						W1-W8	Yes	3.3269e-05	0.000299421
Time x Sex x Genotype	0.4433	0.8504	ns	No						W2-W8	No	0.933743	0.933743				Time x Sex x Genotype	0.2719	0.8101	ns	No						W2-W8	Yes	0.00145093	0.00652918
									M KO	W1-W2	No	0.0570694	0.390189													M KO	W1-W2	No	0.435223	0.576019
ANOVA table	SS (Type III)	DF	MS	F (DFn, DFd)	P value					W1-W8	No	0.0686133	0.390189				ANOVA table	SS (Type III)	DF	MS	F (DFn, DFd)	P value					W1-W8	Yes	1.9751e-05	0.000299421
Time	0.01667	2	0.008336	F (2, 57) = 1.535	P=0.2243					W2-W8	No	0.322248	0.672272				Time	0.4673	2	0.2337	F (2, 67) = 29.04	P<0.0001					W2-W8	Yes	0.00030198	0.00181188
Sex	0.009539	1	0.009539	F (1, 57) = 1.756	P=0.1904				F WT	W1-W2	No	0.847463	0.897314				Sex	0.001638	1	0.001638	F (1, 67) = 0.2036	P=0.6533				F WT	W1-W2	No	0.0406933	0.12208
Genotype	0.02823	1	0.02823	F (1, 57) = 5.197	P=0.0264					W1-W8	No	0.336136	0.672272				Genotype	0.0259	1	0.0259	F (1, 67) = 3.218	P=0.0773					W1-W8	No	0.0259731	0.093503
Time x Sex	0.006129	2	0.003064	F (2, 57) = 0.5641	P=0.5720					W2-W8	No	0.44405	0.785038				Time x Sex	0.1739	2	0.08693	F (2, 67) = 10.80	P<0.0001					W2-W8	No	0.844332	0.844332
Time x Genotype	0.02145	2	0.01072	F (2, 57) = 1.974	P=0.1483				F KO	W1-W2	No	0.131846	0.395538				Time x Genotype	0.004495	2	0.002247	F (2, 67) = 0.2793	P=0.7572				F KO	W1-W2	No	0.239742	0.431535
Sex x Genotype	0.0003871	1	0.0003871	F (1, 57) = 0.07125	P=0.7905					W1-W8	No	0.281414	0.672272				Sex x Genotype	0.01269	1	0.01269	F (1, 67) = 1.577	P=0.2136					W1-W8	No	0.123997	0.31885
Time x Sex x Genotype	0.001766	2	0.0008828	F (2, 57) = 0.1625	P=0.8504					W2-W8	No	0.697811	0.785038				Time x Sex x Genotype	0.0034	2	0.0017	F (2, 67) = 0.2113	P=0.8101					W2-W8	No	0.721514	0.763956
Residual	0.3096	57	0.005432														Residual	0.5391	67	0.008047

## Sheet: FIG3C
Supraspinatus mass/Tibialis Anterior mass; TEN																	Infraspinatus mass/Tibialis Anterior mass; TEN
	MALE																	MALE
	WT								IKKmkd									WT								IKKmkd
W1	0.779783	0.778013	0.826087	0.831157	0.835577	0.869287			0.838266	0.82807	0.856046	0.835577	0.907227	0.890852			W1	0.622622	0.601083	0.534884	0.597353	0.599813	0.650962	0.695612		0.58351	0.55614	0.630518	0.650962	0.639648	0.622661
W2	0.68306	0.86612	0.826214	0.755361					0.804688	0.786133	0.868979	0.831224	0.763208	0.719153			W2	0.490893	0.58561	0.579612	0.633528					0.522461	0.594727	0.612717	0.579114	0.562264	0.571823
W8	0.633218	0.698095	0.645315	0.72048	0.699812	0.680118	0.751381		0.753744	0.700549	0.827652	0.669508	0.795918	0.746978			W8	0.442042	0.542857	0.478967	0.602399	0.521576	0.500984	0.469613		0.440932	0.582418	0.576705	0.442235	0.496599	0.493955	0.557065
	FEMALE																	FEMALE
	WT								IKKmkd									WT								IKKmkd
W1	0.696629	0.790274	0.774869	0.918883	1.01154		0.827546		0.847044	0.820449	0.822785	0.786842	0.809406	0.845023	0.825871		W1	0.566011	0.589666	0.536649	0.680851	0.679487		0.650463		0.609255	0.629676	0.573418	0.517105	0.50495	0.621041	0.633085
W2	0.766393	0.782297	0.763797	0.754329	0.809645		0.7		0.802133	0.839853	0.744152	0.665533	0.845771				W2	0.45765	0.582536	0.57064	0.538961	0.536802		0.530952		0.606635	0.44621	0.593567	0.519274	0.589552
W8	0.642058	0.741135	0.785882	0.6373	0.748843	0.824363	0.732394		0.714109	0.785714	0.691799	0.73	0.78683	0.918246			W8	0.428412	0.50591	0.611765	0.522883	0.532407	0.566572	0.503521		0.535891	0.505291	0.564815	0.564444	0.482143	0.636256
Three-way ANOVA	Ordinary								Original FDR method of Benjamini and Hochberg	Q: 5%							Three-way ANOVA	Ordinary								Original FDR method of Benjamini and Hochberg	Q: 5%
Alpha	0.05										Discovery?	P value	q value				Alpha	0.05										Discovery?	P value	q value
									M	W1	No	0.0721324	0.185483													M	W1	No	0.977507	0.977507
Source of Variation	% of total variation	P value	P value summary	Significant?						W2	No	0.764918	0.809913				Source of Variation	% of total variation	P value	P value summary	Significant?						W2	No	0.960637	0.977507
Time	32.12	<0.0001	****	Yes						W8	No	0.055543	0.181345				Time	32.8	<0.0001	****	Yes						W8	No	0.884689	0.977507
Sex	0.005005	0.9431	ns	No					F	W1	No	0.748288	0.809913				Sex	0.2123	0.6439	ns	No					F	W1	No	0.322066	0.579719
Genotype	2.996	0.0846	ns	No						W2	No	0.639995	0.767994				Genotype	0.01953	0.8884	ns	No						W2	No	0.671322	0.885205
Time x Sex	2.166	0.3357	ns	No						W8	No	0.349924	0.449902				Time x Sex	3.454	0.1814	ns	No						W8	No	0.461461	0.692192
Time x Genotype	1.399	0.492	ns	No					M WT	W1-W2	No	0.338222	0.449902				Time x Genotype	1.219	0.5416	ns	No					M WT	W1-W2	No	0.238536	0.512386
Sex x Genotype	0.5781	0.4442	ns	No						W1-W8	Yes	8.1545e-05	0.00146781				Sex x Genotype	1.715e-06	0.999	ns	No						W1-W8	Yes	0.0023174	0.038781
Time x Sex x Genotype	0.6108	0.7321	ns	No						W2-W8	No	0.0296807	0.133563				Time x Sex x Genotype	0.8899	0.6384	ns	No						W2-W8	No	0.0981938	0.252498
									M KO	W1-W2	No	0.029666	0.133563													M KO	W1-W2	No	0.0669928	0.200978
ANOVA table	SS (Type III)	DF	MS	F (DFn, DFd)	P value					W1-W8	Yes	0.00236449	0.0212804				ANOVA table	SS (Type III)	DF	MS	F (DFn, DFd)	P value					W1-W8	Yes	0.004309	0.038781
Time	0.1259	2	0.06293	F (2, 60) = 16.48	P<0.0001					W2-W8	No	0.177299	0.290126				Time	0.09352	2	0.04676	F (2, 62) = 16.66	P<0.0001					W2-W8	No	0.0468552	0.168679
Sex	1.961e-05	1	1.961e-05	F (1, 60) = 0.005136	P=0.9431				F WT	W1-W2	No	0.156098	0.290126				Sex	0.0006054	1	0.0006054	F (1, 62) = 0.2157	P=0.6439				F WT	W1-W2	No	0.0252327	0.113547
Genotype	0.01174	1	0.01174	F (1, 60) = 3.074	P=0.0846					W1-W8	No	0.0604483	0.181345				Genotype	5.568e-05	1	5.568e-05	F (1, 62) = 0.01984	P=0.8884					W1-W8	No	0.016643	0.0998581
Time x Sex	0.00849	2	0.004245	F (2, 60) = 1.111	P=0.3357					W2-W8	No	0.326066	0.449902				Time x Sex	0.009847	2	0.004924	F (2, 62) = 1.755	P=0.1814					W2-W8	No	0.688493	0.885205
Time x Genotype	0.005482	2	0.002741	F (2, 60) = 0.7178	P=0.4920				F KO	W1-W2	No	0.175392	0.290126				Time x Genotype	0.003476	2	0.001738	F (2, 62) = 0.6193	P=0.5416				F KO	W1-W2	No	0.367542	0.601433
Sex x Genotype	0.002266	1	0.002266	F (1, 60) = 0.5932	P=0.4442					W1-W8	No	0.134353	0.290126				Sex x Genotype	4.889e-09	1	4.889e-09	F (1, 62) = 1.742e-006	P=0.9990					W1-W8	No	0.256193	0.512386
Time x Sex x Genotype	0.002394	2	0.001197	F (2, 60) = 0.3134	P=0.7321					W2-W8	No	0.864892	0.864892				Time x Sex x Genotype	0.002537	2	0.001269	F (2, 62) = 0.4521	P=0.6384					W2-W8	No	0.938555	0.977507
Residual	0.2291	60	0.003819														Residual	0.174	62	0.002806

## Sheet: FIG3D
Supraspinatus mass/Body mass; W8
	MALE
	WT								IKKmca
SHM	1.80665	1.74361	1.99725	1.76048	1.86524	1.87541	1.66281		1.55142	1.83813	1.84787	1.77186	1.93232	1.78795
TEN	1.66901	1.43464	1.55246	1.49082	1.39579	1.43461	1.57949		1.50615	1.27479	1.45618	1.34589	1.58036
	FEMALE
	WT								IKKmca
SHM	1.7359	1.8359	1.64708	1.72539	1.75546	1.97321			1.83216	1.88285	1.94444	2.09626	2.03843	1.81055	1.78694
TEN	1.32516	1.31303	1.37313	1.45092	1.63137	1.5639	1.62173		1.1824	1.32739	1.4229	1.14689	1.3313	1.51896	1.43022
Three-way ANOVA	Ordinary								Šídák's multiple comparisons test	Mean Diff.	95.00% CI of diff.	Below threshold?	Summary	Adjusted P Value
Alpha	0.05
									SHM:WT Male vs. TEN:WT Male	0.3078	0.1326 to 0.4830	Yes	****	<0.0001
Source of Variation	% of total variation	P value	P value summary	Significant?					SHM:IKK Male vs. TEN:IKK Male	0.4076	0.2091 to 0.6060	Yes	****	<0.0001
Treatment	77.8	<0.0001	****	Yes					SHM:WT Female vs. TEN:WT Female	0.3392	0.1473 to 0.5311	Yes	****	<0.0001
Sex	2.737e-05	0.9943	ns	No					SHM:IKK Female vs. TEN:IKK Female	0.4764	0.2779 to 0.6749	Yes	****	<0.0001
Genotype	0.17	0.574	ns	No					SHM:WT Male vs. SHM:IKK Male	-0.02431	-0.2067 to 0.1581	No	ns	>0.9999
Treatment x Sex	0.3337	0.4317	ns	No					SHM:WT Female vs. SHM:IKK Female	-0.05839	-0.2408 to 0.1240	No	ns	0.9929
Treatment x Genotype	1.864	0.0678	ns	No					TEN:WT Male vs. TEN:IKK Male	0.07544	-0.1165 to 0.2674	No	ns	0.9632
Sex x Genotype	0.03133	0.809	ns	No					TEN:WT Female vs. TEN:IKK Female	0.07881	-0.1285 to 0.2861	No	ns	0.9713
Treatment x Sex x Genotype	0.04654	0.7683	ns	No					SHM:WT Male vs. SHM:WT Female	-0.008251	-0.1835 to 0.1670	No	ns	>0.9999
									SHM:IKK Male vs. SHM:IKK Female	-0.04233	-0.2316 to 0.1469	No	ns	0.9998
ANOVA table	SS (Type III)	DF	MS	F (DFn, DFd)	P value				TEN:WT Male vs. TEN:WT Female	0.02316	-0.1688 to 0.2151	No	ns	>0.9999
Treatment	1.721	1	1.721	F (1, 40) = 147.1	P<0.0001				TEN:IKK Male vs. TEN:IKK Female	0.02652	-0.1808 to 0.2338	No	ns	>0.9999
Sex	6.053e-07	1	6.053e-07	F (1, 40) = 5.175e-005	P=0.9943
Genotype	0.003759	1	0.003759	F (1, 40) = 0.3214	P=0.5740
Treatment x Sex	0.007381	1	0.007381	F (1, 40) = 0.6310	P=0.4317
Treatment x Genotype	0.04122	1	0.04122	F (1, 40) = 3.524	P=0.0678
Sex x Genotype	0.0006929	1	0.0006929	F (1, 40) = 0.05924	P=0.8090
Treatment x Sex x Genotype	0.00103	1	0.00103	F (1, 40) = 0.08801	P=0.7683
Residual	0.4679	40	0.0117

## Sheet: FIG3E
Infraspinatus mass/Body mass; W8
	MALE
	WT								IKKmca
SHM	1.28294	1.28197	1.19146	1.32934	1.34278	1.53024	1.30083		1.34701	1.3809	1.42129	1.23768	1.2978	1.22654
TEN	1.11969	0.957102	1.04568	1.08931	0.957211	1.02221	1.02182		1.04634	0.858276	1.00069	0.92637	1.14464
	FEMALE
	WT								IKKmca
SHM	1.27678	1.31282	1.30781	1.21709	1.25328	1.30804			1.41696	1.31799	1.27931	1.36861	1.45033	1.22302	1.34021
TEN	1.03983	0.971683	0.939628	1.09087	1.14656	1.05898	0.96302		0.901915	1.05194	0.939252	0.89725	0.981362	0.96249	0.817271
Three-way ANOVA	Ordinary								Šídák's multiple comparisons test	Mean Diff.	95.00% CI of diff.	Below threshold?	Summary	Adjusted P Value
Alpha	0.05
									SHM:WT Male vs. TEN:WT Male	0.2924	0.1644 to 0.4203	Yes	****	<0.0001
Source of Variation	% of total variation	P value	P value summary	Significant?					SHM:IKK Male vs. TEN:IKK Male	0.3233	0.1783 to 0.4682	Yes	****	<0.0001
Treatment	78.3	<0.0001	****	Yes					SHM:WT Female vs. TEN:WT Female	0.2492	0.1161 to 0.3824	Yes	****	<0.0001
Sex	0.3052	0.3757	ns	No					SHM:IKK Female vs. TEN:IKK Female	0.4064	0.2785 to 0.5344	Yes	****	<0.0001
Genotype	0.241	0.4307	ns	No					SHM:WT Male vs. SHM:IKK Male	0.004257	-0.1289 to 0.1374	No	ns	>0.9999
Treatment x Sex	0.07754	0.6542	ns	No					SHM:WT Female vs. SHM:IKK Female	-0.06304	-0.1962 to 0.07012	No	ns	0.8777
Treatment x Genotype	1.714	0.0396	*	Yes					TEN:WT Male vs. TEN:IKK Male	0.03517	-0.1050 to 0.1753	No	ns	0.9993
Sex x Genotype	0.003347	0.9258	ns	No					TEN:WT Female vs. TEN:IKK Female	0.09416	-0.03378 to 0.2221	No	ns	0.321
Treatment x Sex x Genotype	0.7727	0.1616	ns	No					SHM:WT Male vs. SHM:WT Female	0.04349	-0.08967 to 0.1767	No	ns	0.9919
									SHM:IKK Male vs. SHM:IKK Female	-0.02381	-0.1570 to 0.1094	No	ns	>0.9999
ANOVA table	SS (Type III)	DF	MS	F (DFn, DFd)	P value				TEN:WT Male vs. TEN:WT Female	0.0003496	-0.1276 to 0.1283	No	ns	>0.9999
Treatment	1.295	1	1.295	F (1, 44) = 205.4	P<0.0001				TEN:IKK Male vs. TEN:IKK Female	0.05934	-0.08081 to 0.1995	No	ns	0.9396
Sex	0.005049	1	0.005049	F (1, 44) = 0.8007	P=0.3757
Genotype	0.003988	1	0.003988	F (1, 44) = 0.6324	P=0.4307
Treatment x Sex	0.001283	1	0.001283	F (1, 44) = 0.2034	P=0.6542
Treatment x Genotype	0.02836	1	0.02836	F (1, 44) = 4.498	P=0.0396
Sex x Genotype	5.538e-05	1	5.538e-05	F (1, 44) = 0.008782	P=0.9258
Treatment x Sex x Genotype	0.01278	1	0.01278	F (1, 44) = 2.027	P=0.1616
Residual	0.2775	44	0.006306

## Sheet: FIG3F
Supraspinatus mass/Tibialis Anterior mass; TEN																	Infraspinatus mass/Tibialis Anterior mass; TEN
	SS																	IS
	WT								IKKmca									WT								IKKmca
MALE	0.737209	0.735477	0.900621	0.754098	0.698618	0.710297	0.865275		0.714777	0.708417	0.650231	0.636953	0.906762				MALE	0.487768	0.547454	0.563895	0.561433	0.5254	0.510923	0.575722		0.499654	0.484923	0.440194	0.436009	0.624026
FEMALE	0.750542	0.75558	0.828767	0.854798	0.72049	0.961538	0.884454		0.777042	0.846154	0.867521	0.706013	1.02486	0.817757	0.815265		FEMALE	0.588937	0.559152	0.567123	0.642677	0.660356	0.651099	0.52521		0.592715	0.670569	0.678063	0.552339	0.585635	0.602804	0.516593
Two-way ANOVA	Ordinary								Šídák's multiple comparisons test	Predicted (LS) mean diff.	95.00% CI of diff.	Below threshold?	Summary	Adjusted P Value			Two-way ANOVA	Ordinary								Šídák's multiple comparisons test	Predicted (LS) mean diff.	95.00% CI of diff.	Below threshold?	Summary	Adjusted P Value
Alpha	0.05																Alpha	0.05
									WT - IKK																	WT - IKK
Source of Variation	% of total variation	P value	P value summary	Significant?					MALE	0.04823	-0.08105 to 0.1775	No	ns	0.6161			Source of Variation	% of total variation	P value	P value summary	Significant?					MALE	0.04198	-0.03526 to 0.1192	No	ns	0.369
Interaction	2.651	0.4024	ns	No					FEMALE	-0.01406	-0.1321 to 0.1040	No	ns	0.9505			Interaction	2.598	0.3392	ns	No					FEMALE	-0.0005947	-0.07110 to 0.06991	No	ns	0.9997
Sex	18.29	0.0353	*	Yes													Sex	38.14	0.0011	**	Yes
Genotype	0.7976	0.6442	ns	No													Genotype	2.455	0.3526	ns	No
ANOVA table	SS (Type III)	DF	MS	F (DFn, DFd)	P value												ANOVA table	SS (Type III)	DF	MS	F (DFn, DFd)	P value
Interaction	0.006173	1	0.006173	F (1, 22) = 0.7291	P=0.4024												Interaction	0.002884	1	0.002884	F (1, 22) = 0.9543	P=0.3392
Time	0.04258	1	0.04258	F (1, 22) = 5.029	P=0.0353												Time	0.04234	1	0.04234	F (1, 22) = 14.01	P=0.0011
Genotype	0.001857	1	0.001857	F (1, 22) = 0.2193	P=0.6442												Genotype	0.002725	1	0.002725	F (1, 22) = 0.9017	P=0.3526
Residual	0.1863	22	0.008466														Residual	0.06648	22	0.003022
Difference between column means																	Difference between column means
Predicted (LS) mean of WT	0.797																Predicted (LS) mean of WT	0.5691
Predicted (LS) mean of IKK	0.7799																Predicted (LS) mean of IKK	0.5484
Difference between predicted means	0.01708																Difference between predicted means	0.02069
SE of difference	0.03648																SE of difference	0.02179
95% CI of difference	-0.05856 to 0.09273																95% CI of difference	-0.02450 to 0.06589
Difference between row means																	Difference between row means
Predicted (LS) mean of MALE	0.7475																Predicted (LS) mean of MALE	0.518
Predicted (LS) mean of FEMALE	0.8293																Predicted (LS) mean of FEMALE	0.5995
Difference between predicted means	-0.0818																Difference between predicted means	-0.08157
SE of difference	0.03648																SE of difference	0.02179
95% CI of difference	-0.1574 to -0.006155																95% CI of difference	-0.1268 to -0.03637
Interaction CI																	Interaction CI
Mean diff, A1 - B1	0.04823																Mean diff, A1 - B1	0.04198
Mean diff, A2 - B2	-0.01406																Mean diff, A2 - B2	-0.0005947
(A1 -B1) - (A2 - B2)	0.06229																(A1 -B1) - (A2 - B2)	0.04258
95% CI of difference	-0.08900 to 0.2136																95% CI of difference	-0.04781 to 0.1330
(B1 - A1) - (B2 - A2)	-0.06229																(B1 - A1) - (B2 - A2)	-0.04258
95% CI of difference	-0.2136 to 0.08900																95% CI of difference	-0.1330 to 0.04781
Data summary																	Data summary
Number of columns (Genotype)	2																Number of columns (Genotype)	2
Number of rows (Sex)	2																Number of rows (Sex)	2
Number of values	26																Number of values	26
