# Supplementary material for: Tenotomy-induced muscle atrophy is sex-specific and independent of NFκB
Source: eLife journal article supplement (doi:10.7554/elife.82016), 2022-12-12
Supplement: supp [file elife-82016-supp-v1.zip › elife_poa_e82016_Figure_4_source_data_1.xlsx]

## Sheet: FIG4A
Supraspinatus Peak Tetanic Tension (kPa); SHM																Supraspinatus Peak Tetanic Tension (kPa); TEN
	MALE																MALE
	WT								IKKmkd								WT								IKKmkd
W2	228.332	239.008	240.908	213.28	233.704				236.568	213.28	200.24	179.891	251.498	223.713		W2	154.796	160.007	188.892	141.707	146.251	183.253			143.975	155.858	152.249	158.546	171.132	183.326
W8	179.119	218.535	192.213	213.093	233.267	219.151	193.41		229.327	216.285	207.378	217.857	213.569			W8	141.766	115.272	167.839	185.859	129.296	181.531			150.936	153.672	142.618	126.677	169.118	160.7
	FEMALE																FEMALE
	WT								IKKmkd								WT								IKKmkd
W2	215.193	226.729	179.874	176.82	184.375				184.375	180.325	193.094	159.125	165			W2	121.872	106.96	162.669	126.575	127.212	175.17			130.741	116.076	133.212	154.181	120.969
W8	185.974	215.253	176.906	166.362	178.944	177.235	202.062		166.298	167.469	185.651	193.353	218.576			W8	175.603	116.704	136.202	132.988	147.791	116.307	131.363		148.384	165.916	124.35	152.652	155.063	103.519
Three-way ANOVA	Ordinary								Šídák's multiple comparisons test	Mean Diff.	95.00% CI of diff.	Below threshold?	Summary	Adjusted P Value		Three-way ANOVA	Ordinary								Šídák's multiple comparisons test	Mean Diff.	95.00% CI of diff.	Below threshold?	Summary	Adjusted P Value
Alpha	0.05															Alpha	0.05
									W2:MALE WT vs. W8:MALE WT	24.08	-8.883 to 57.04	No	ns	0.3255											W2:MALE WT vs. W8:MALE WT	8.891	-27.92 to 45.70	No	ns	0.9995
Source of Variation	% of total variation	P value	P value summary	Significant?					W2:MALE IKK vs. W8:MALE IKK	0.6485	-33.44 to 34.73	No	ns	>0.9999		Source of Variation	% of total variation	P value	P value summary	Significant?					W2:MALE IKK vs. W8:MALE IKK	10.23	-26.58 to 47.04	No	ns	0.998
Time	1.698	0.2627	ns	No					W2:FEMALE WT vs. W8:FEMALE WT	10.49	-22.47 to 43.45	No	ns	0.993		Time	0.2317	0.7279	ns	No					W2:FEMALE WT vs. W8:FEMALE WT	0.035	-35.44 to 35.51	No	ns	>0.9999
Sex	42.73	<0.0001	****	Yes					W2:FEMALE IKK vs. W8:FEMALE IKK	-9.886	-45.49 to 25.72	No	ns	0.998		Sex	21.05	0.0018	**	Yes					W2:FEMALE IKK vs. W8:FEMALE IKK	-10.61	-49.22 to 28.00	No	ns	0.9982
Genotype	1.48	0.2952	ns	No					W2:MALE WT vs. W2:MALE IKK	13.51	-20.57 to 47.60	No	ns	0.9598		Genotype	0.09186	0.8265	ns	No					W2:MALE WT vs. W2:MALE IKK	1.637	-35.17 to 38.45	No	ns	>0.9999
Time x Sex	1.539	0.2859	ns	No					W2:FEMALE WT vs. W2:FEMALE IKK	20.21	-15.39 to 55.81	No	ns	0.6863		Time x Sex	2.8	0.2303	ns	No					W2:FEMALE WT vs. W2:FEMALE IKK	5.707	-32.90 to 44.31	No	ns	>0.9999
Time x Genotype	5.078	0.0568	ns	No					W8:MALE WT vs. W8:MALE IKK	-9.914	-42.87 to 23.05	No	ns	0.9957		Time x Genotype	0.2752	0.7046	ns	No					W8:MALE WT vs. W8:MALE IKK	2.973	-33.84 to 39.78	No	ns	>0.9999
Sex x Genotype	0.716	0.4649	ns	No					W8:FEMALE WT vs. W8:FEMALE IKK	-0.1644	-33.12 to 32.80	No	ns	>0.9999		Sex x Genotype	0.04688	0.8756	ns	No					W8:FEMALE WT vs. W8:FEMALE IKK	-4.939	-40.41 to 30.53	No	ns	>0.9999
Time x Sex x Genotype	0.02461	0.8919	ns	No					W2:MALE WT vs. W2:FEMALE WT	34.45	-1.153 to 70.05	No	ns	0.0644		Time x Sex x Genotype	0.456	0.6257	ns	No					W2:MALE WT vs. W2:FEMALE WT	25.74	-11.07 to 62.55	No	ns	0.3897
									W2:MALE IKK vs. W2:FEMALE IKK	41.15	7.063 to 75.23	Yes	**	0.0089											W2:MALE IKK vs. W2:FEMALE IKK	29.81	-8.795 to 68.42	No	ns	0.256
ANOVA table	SS (Type III)	DF	MS	F (DFn, DFd)	P value				W8:MALE WT vs. W8:FEMALE WT	20.86	-9.223 to 50.95	No	ns	0.3987		ANOVA table	SS (Type III)	DF	MS	F (DFn, DFd)	P value				W8:MALE WT vs. W8:FEMALE WT	16.89	-18.59 to 52.36	No	ns	0.871
Time	441.9	1	441.9	F (1, 37) = 1.293	P=0.2627				W8:MALE IKK vs. W8:FEMALE IKK	30.61	-4.987 to 66.21	No	ns	0.1423		Time	54.33	1	54.33	F (1, 40) = 0.1228	P=0.7279				W8:MALE IKK vs. W8:FEMALE IKK	8.973	-27.84 to 45.78	No	ns	0.9994
Sex	11118	1	11118	F (1, 37) = 32.55	P<0.0001											Sex	4936	1	4936	F (1, 40) = 11.15	P=0.0018
Genotype	385.1	1	385.1	F (1, 37) = 1.127	P=0.2952											Genotype	21.54	1	21.54	F (1, 40) = 0.04867	P=0.8265
Time x Sex	400.5	1	400.5	F (1, 37) = 1.172	P=0.2859											Time x Sex	656.6	1	656.6	F (1, 40) = 1.484	P=0.2303
Time x Genotype	1321	1	1321	F (1, 37) = 3.868	P=0.0568											Time x Genotype	64.54	1	64.54	F (1, 40) = 0.1458	P=0.7046
Sex x Genotype	186.3	1	186.3	F (1, 37) = 0.5453	P=0.4649											Sex x Genotype	10.99	1	10.99	F (1, 40) = 0.02484	P=0.8756
Time x Sex x Genotype	6.402	1	6.402	F (1, 37) = 0.01874	P=0.8919											Time x Sex x Genotype	106.9	1	106.9	F (1, 40) = 0.2416	P=0.6257
Residual	12640	37	341.6													Residual	17703	40	442.6

## Sheet: FIG4B
Infraspinus Peak Tetanic Tension (kPa); SHM																Infraspinatus Peak Tetanic Tension (kPa); TEN
	MALE																MALE
	WT								IKKmkd								WT								IKKmkd
W2	187.519	180.697	195.054	186.624	177.178				222.598	196.965	217.968	216.618	217.751	182.868		W2	152.505	157.515	145.801	123.903	153.346	127.55			115.611	145.265	131.936	134.75	115.196	134.034	152.982
W8	253.104	214.401	183.684	156.085	164.078	173.457			159.031	161.931	165.052	188.947	194.368			W8	142.932	121.09	118.087	129.758	119.18	95.441	142.771		152.772	141.862	145.585	140.408	86.5724	134.711	117.79
	FEMALE																FEMALE
	WT								IKKmkd								WT								IKKmkd
W2	170.416	179.634	176.067	169.605					202.686	176.88	157.136	167.391	165.092			W2	137.788	111.999	129.729	150.303	119.185	126.891	107.029		115.878	123.883	157.155	136.715	78.5995	109.184
W8	168.136	153.376	165.785	174.469	179.943	144.754			106.015	186.003	193.823	172.733	152.265			W8	164.823	171.301	129.585	129.585	132.67	137.906	142.286		162.397	103.144	133.35	135.156	146.557	150.44
Three-way ANOVA	Ordinary								Šídák's multiple comparisons test	Mean Diff.	95.00% CI of diff.	Below threshold?	Summary	Adjusted P Value		Three-way ANOVA	Ordinary								Šídák's multiple comparisons test	Mean Diff.	95.00% CI of diff.	Below threshold?	Summary	Adjusted P Value
Alpha	0.05															Alpha	0.05
									W2:MALE WT vs. W8:MALE WT	-5.387	-46.02 to 35.25	No	ns	>0.9999											W2:MALE WT vs. W8:MALE WT	19.26	-11.90 to 50.41	No	ns	0.5778
Source of Variation	% of total variation	P value	P value summary	Significant?					W2:MALE IKK vs. W8:MALE IKK	35.26	-5.374 to 75.90	No	ns	0.1337		Source of Variation	% of total variation	P value	P value summary	Significant?					W2:MALE IKK vs. W8:MALE IKK	1.439	-28.49 to 31.37	No	ns	>0.9999
Time	6.513	0.0698	ns	No					W2:FEMALE WT vs. W8:FEMALE WT	9.52	-33.80 to 52.84	No	ns	0.9998		Time	1.031	0.4545	ns	No					W2:FEMALE WT vs. W8:FEMALE WT	-17.89	-47.82 to 12.04	No	ns	0.626
Sex	17.99	0.0038	**	Yes					W2:FEMALE IKK vs. W8:FEMALE IKK	11.67	-30.77 to 54.11	No	ns	0.9981		Sex	0.03697	0.887	ns	No					W2:FEMALE IKK vs. W8:FEMALE IKK	-18.27	-50.60 to 14.06	No	ns	0.7013
Genotype	0.04928	0.8716	ns	No					W2:MALE WT vs. W2:MALE IKK	-23.71	-64.35 to 16.92	No	ns	0.6454		Genotype	0.9459	0.4735	ns	No					W2:MALE WT vs. W2:MALE IKK	10.61	-20.54 to 41.77	No	ns	0.9885
Time x Sex	0.1885	0.7521	ns	No					W2:FEMALE WT vs. W2:FEMALE IKK	0.0933	-44.92 to 45.11	No	ns	>0.9999		Time x Sex	13.93	0.008	**	Yes					W2:FEMALE WT vs. W2:FEMALE IKK	5.896	-25.26 to 37.05	No	ns	>0.9999
Time x Genotype	4.575	0.1259	ns	No					W8:MALE WT vs. W8:MALE IKK	16.94	-23.70 to 57.57	No	ns	0.9413		Time x Genotype	1.427	0.3794	ns	No					W8:MALE WT vs. W8:MALE IKK	-7.206	-37.14 to 22.73	No	ns	0.9995
Sex x Genotype	0.2075	0.7403	ns	No					W8:FEMALE WT vs. W8:FEMALE IKK	2.243	-38.39 to 42.88	No	ns	>0.9999		Sex x Genotype	0.2761	0.698	ns	No					W8:FEMALE WT vs. W8:FEMALE IKK	5.515	-25.64 to 36.67	No	ns	>0.9999
Time x Sex x Genotype	3.702	0.1672	ns	No					W2:MALE WT vs. W2:FEMALE WT	11.48	-33.53 to 56.50	No	ns	0.999		Time x Sex x Genotype	1.31	0.3995	ns	No					W2:MALE WT vs. W2:FEMALE WT	17.3	-13.85 to 48.46	No	ns	0.723
									W2:MALE IKK vs. W2:FEMALE IKK	35.29	-5.345 to 75.93	No	ns	0.1331											W2:MALE IKK vs. W2:FEMALE IKK	12.59	-18.57 to 43.74	No	ns	0.9567
ANOVA table	SS (Type III)	DF	MS	F (DFn, DFd)	P value				W8:MALE WT vs. W8:FEMALE WT	26.39	-12.35 to 65.14	No	ns	0.421		ANOVA table	SS (Type III)	DF	MS	F (DFn, DFd)	P value				W8:MALE WT vs. W8:FEMALE WT	-19.84	-49.78 to 10.09	No	ns	0.4735
Time	1682	1	1682	F (1, 34) = 3.505	P=0.0698				W8:MALE IKK vs. W8:FEMALE IKK	11.7	-30.75 to 54.14	No	ns	0.998		Time	197	1	197	F (1, 45) = 0.5693	P=0.4545				W8:MALE IKK vs. W8:FEMALE IKK	-7.122	-38.28 to 24.03	No	ns	0.9997
Sex	4646	1	4646	F (1, 34) = 9.680	P=0.0038											Sex	7.066	1	7.066	F (1, 45) = 0.02042	P=0.8870
Genotype	12.73	1	12.73	F (1, 34) = 0.02652	P=0.8716											Genotype	180.8	1	180.8	F (1, 45) = 0.5226	P=0.4735
Time x Sex	48.68	1	48.68	F (1, 34) = 0.1014	P=0.7521											Time x Sex	2662	1	2662	F (1, 45) = 7.694	P=0.0080
Time x Genotype	1182	1	1182	F (1, 34) = 2.462	P=0.1259											Time x Genotype	272.7	1	272.7	F (1, 45) = 0.7882	P=0.3794
Sex x Genotype	53.59	1	53.59	F (1, 34) = 0.1116	P=0.7403											Sex x Genotype	52.78	1	52.78	F (1, 45) = 0.1525	P=0.6980
Time x Sex x Genotype	956.3	1	956.3	F (1, 34) = 1.992	P=0.1672											Time x Sex x Genotype	250.4	1	250.4	F (1, 45) = 0.7235	P=0.3995
Residual	16320	34	480													Residual	15571	45	346

## Sheet: FIG4C
Supraspinatus Peak Tetanic Tension (kPa); SHM
	MALE
	WT								IKKmca
SHM	206.466	221.574	231.812	230.55	199.16	195.109			219.949	208.136	217.081	242.156	203.369	210.709
TEN	188.924	182.786	171.56	171.914	189.146	189.544	180.775		174.053	148.649	179.208	162.536	191.466
	FEMALE
	WT								IKKmkd
SHM	193.973	175.603	179.936	194.09	177.445				162.411	168.574	166.176	190.894	145.016
TEN	115.6	133.512	127.873	152.294	158.896	154.496	148.374		148.075	133.475	143.136	139.612	138.669	113.412	147.231
Three-way ANOVA	Ordinary								Šídák's multiple comparisons test	Mean Diff.	95.00% CI of diff.	Below threshold?	Summary	Adjusted P Value
Alpha	0.05
									SHM:WT Male vs. TEN:WT Male	32.02	9.267 to 54.77	Yes	**	0.0014
Source of Variation	% of total variation	P value	P value summary	Significant?					SHM:IKK Male vs. TEN:IKK Male	45.72	20.95 to 70.48	Yes	****	<0.0001
Treatment	35.04	<0.0001	****	Yes					SHM:WT Female vs. TEN:WT Female	42.63	18.69 to 66.58	Yes	****	<0.0001
Sex	37.37	<0.0001	****	Yes					SHM:IKK Female vs. TEN:IKK Female	29.55	6.234 to 52.86	Yes	**	0.0051
Genotype	1.425	0.0606	ns	No					SHM:WT Male vs. SHM:IKK Male	-2.788	-26.40 to 20.82	No	ns	>0.9999
Treatment x Sex	0.04814	0.7246	ns	No					SHM:WT Female vs. SHM:IKK Female	17.6	-8.269 to 43.46	No	ns	0.4311
Treatment x Genotype	0.0005888	0.9689	ns	No					TEN:WT Male vs. TEN:IKK Male	10.91	-13.04 to 34.86	No	ns	0.9012
Sex x Genotype	0.3049	0.3773	ns	No					TEN:WT Female vs. TEN:IKK Female	4.511	-16.65 to 25.68	No	ns	0.9999
Treatment x Sex x Genotype	1.118	0.0949	ns	No					SHM:WT Male vs. SHM:WT Female	29.9	5.139 to 54.67	Yes	**	0.0087
									SHM:IKK Male vs. SHM:IKK Female	50.29	25.52 to 75.05	Yes	****	<0.0001
ANOVA table	SS (Type III)	DF	MS	F (DFn, DFd)	P value				TEN:WT Male vs. TEN:WT Female	40.52	18.66 to 62.37	Yes	****	<0.0001
Treatment	16722	1	16722	F (1, 41) = 91.57	P<0.0001				TEN:IKK Male vs. TEN:IKK Female	34.12	10.80 to 57.43	Yes	***	0.0008
Sex	17833	1	17833	F (1, 41) = 97.65	P<0.0001
Genotype	679.9	1	679.9	F (1, 41) = 3.723	P=0.0606
Treatment x Sex	22.97	1	22.97	F (1, 41) = 0.1258	P=0.7246
Treatment x Genotype	0.281	1	0.281	F (1, 41) = 0.001539	P=0.9689
Sex x Genotype	145.5	1	145.5	F (1, 41) = 0.7967	P=0.3773
Treatment x Sex x Genotype	533.7	1	533.7	F (1, 41) = 2.922	P=0.0949
Residual	7487	41	182.6

## Sheet: FIG4D
Infraspinatus Peak Tetanic Tension (kPa); SHM
	MALE
	WT								IKKmca
SHM	194.701	159.13	213.882	192.268	192.748	173.246			183.633	157.956	165.783	177.893	221.199	213.507
TEN	151.296	124.698	143.725	129.238	146.461				132.664	164.233	114.93	153.411	154.283
	FEMALE
	WT								IKKmkd
SHM	146.088	159.454	141.393	158.075	170.769				155.283	178.617	186.69	186.708	182.851	147.516	112.805
TEN	132.815	140.546	160.965	125.19	118.649	112.805			144.818	125.376	100.507	112.608	128.935	145.485	112.495
Three-way ANOVA	Ordinary								Šídák's multiple comparisons test	Mean Diff.	95.00% CI of diff.	Below threshold?	Summary	Adjusted P Value
Alpha	0.05
									SHM:WT Male vs. TEN:WT Male	48.58	11.91 to 85.25	Yes	**	0.0031
Source of Variation	% of total variation	P value	P value summary	Significant?					SHM:IKK Male vs. TEN:IKK Male	42.76	6.090 to 79.42	Yes	*	0.0126
Treatment	42.95	<0.0001	****	Yes					SHM:WT Female vs. TEN:WT Female	23.33	-13.34 to 59.99	No	ns	0.5287
Sex	11.97	0.0013	**	Yes					SHM:IKK Female vs. TEN:IKK Female	40.03	7.668 to 72.40	Yes	**	0.0068
Genotype	0.05442	0.8158	ns	No					SHM:WT Male vs. SHM:IKK Male	1.001	-33.96 to 35.96	No	ns	>0.9999
Treatment x Sex	1.404	0.2408	ns	No					SHM:WT Female vs. SHM:IKK Female	-9.197	-44.65 to 26.26	No	ns	0.999
Treatment x Genotype	0.2127	0.6455	ns	No					TEN:WT Male vs. TEN:IKK Male	-4.821	-43.12 to 33.48	No	ns	>0.9999
Sex x Genotype	0.008171	0.9281	ns	No					TEN:WT Female vs. TEN:IKK Female	7.511	-26.18 to 41.20	No	ns	0.9998
Treatment x Sex x Genotype	0.9108	0.3433	ns	No					SHM:WT Male vs. SHM:WT Female	32.51	-4.160 to 69.17	No	ns	0.1183
									SHM:IKK Male vs. SHM:IKK Female	22.31	-11.38 to 56.00	No	ns	0.469
ANOVA table	SS (Type III)	DF	MS	F (DFn, DFd)	P value				TEN:WT Male vs. TEN:WT Female	7.255	-29.41 to 43.92	No	ns	>0.9999
Treatment	17270	1	17270	F (1, 39) = 43.39	P<0.0001				TEN:IKK Male vs. TEN:IKK Female	19.59	-15.87 to 55.04	No	ns	0.7235
Sex	4812	1	4812	F (1, 39) = 12.09	P=0.0013
Genotype	21.88	1	21.88	F (1, 39) = 0.05499	P=0.8158
Treatment x Sex	564.7	1	564.7	F (1, 39) = 1.419	P=0.2408
Treatment x Genotype	85.52	1	85.52	F (1, 39) = 0.2149	P=0.6455
Sex x Genotype	3.286	1	3.286	F (1, 39) = 0.008257	P=0.9281
Treatment x Sex x Genotype	366.3	1	366.3	F (1, 39) = 0.9203	P=0.3433
Residual	15522	39	398
