# Supplementary material for: Tenotomy-induced muscle atrophy is sex-specific and independent of NFκB
Source: eLife journal article supplement (doi:10.7554/elife.82016), 2022-12-12
Supplement: supp [file elife-82016-supp-v1.zip › elife_poa_e82016_Figure_5_figure_supplement_1_source_data_1.xlsx]

## Sheet: FIG5S1 W1
Fiber Type Distribution (%) - W1
	Type 1								Type 2A								Type 2B								Type 2x
WT SHM M	0	0	0.4	0	0				12.4	13.01	16.6	17.2	18.05				62.4	55.28	55.47	47.2	49.62				25.2	31.71	27.53	35.6	32.33
IKK SHM M	0	0	0	0	0				17.56	9.29	28.23	19.08	20.39				51.91	56.79	43.88	50	51.78				30.53	33.93	27.89	30.92	27.83
WT TEN M	0	0	0	0	0	0	0		10.68	9.09	17.57	7.25	10.53	16.27	16.27		55.13	46.82	47.75	66.03	51.32	53.17	45.42		34.19	44.09	34.68	26.72	38.16	30.56	38.31
IKK TEN M	0	0	0	0	0	0			19.17	12.65	18.9	17.32	16.31	15.61			38.66	48.16	50.39	51.18	55.32	58.6			42.17	39.18	30.71	31.5	28.37	25.8
WT SHM F	0	0	0	0					21.91	27.67	27.96	20.38					54.58	39.73	41.56	54.69					23.51	32.6	30.48	24.93
IKK SHM F	0	0	0	0	0	0			21.37	21.13	17.13	13.28	12.01	26.17			45.8	54.76	55.25	49.48	57.66	45.97			32.82	24.11	27.62	37.24	30.33	27.85
WT TEN F	0	0.27	0	0	2.68	0	4.62		8.36	7.77	16.22	14.84	6.85	16.61	24.57		70.74	73.99	50	59.89	59.52	53.87	52.02		20.9	17.96	33.78	25.27	30.95	29.52	18.79
IKK TEN F	0	0	0	0	0	0	0		13.05	12.8	14	20.82	12.04	20.56	15.54		59.96	57.25	64.4	55.39	53.28	48.61	62.55		26.99	29.95	21.6	23.79	34.67	30.84	21.91
	Type 1								Type 2A								Type 2B								Type 2X
	Three-way ANOVA	Ordinary							Three-way ANOVA	Ordinary							Three-way ANOVA	Ordinary							Three-way ANOVA	Ordinary
	Alpha	0.05							Alpha	0.05							Alpha	0.05							Alpha	0.05
	Source of Variation	% of total variation	P value	P value summary	Significant?				Source of Variation	% of total variation	P value	P value summary	Significant?				Source of Variation	% of total variation	P value	P value summary	Significant?				Source of Variation	% of total variation	P value	P value summary	Significant?
	Genotype	3.486	0.1858	ns	No				Genotype	1.622	0.3429	ns	No				Genotype	0.4141	0.6401	ns	No				Genotype	0.08777	0.8243	ns	No
	Sex	2.592	0.2526	ns	No				Sex	2.685	0.2241	ns	No				Sex	2.344	0.2691	ns	No				Sex	16.21	0.0042	**	Yes
	Treatment	2.592	0.2526	ns	No				Treatment	17.1	0.0034	**	Yes				Treatment	7.399	0.0534	ns	No				Treatment	0.1964	0.7399	ns	No
	Genotype x Sex	2.592	0.2526	ns	No				Genotype x Sex	5.578	0.0828	ns	No				Genotype x Sex	1.1	0.447	ns	No				Genotype x Sex	1.952	0.2982	ns	No
	Genotype x Treatment	2.592	0.2526	ns	No				Genotype x Treatment	2.676	0.2249	ns	No				Genotype x Treatment	0.7925	0.5183	ns	No				Genotype x Treatment	0.2594	0.7028	ns	No
	Sex x Treatment	3.486	0.1858	ns	No				Sex x Treatment	2.741	0.2194	ns	No				Sex x Treatment	12.15	0.0147	*	Yes				Sex x Treatment	7.871	0.0407	*	Yes
	Genotype x Sex x Treatment	3.486	0.1858	ns	No				Genotype x Sex x Treatment	1.718	0.3292	ns	No				Genotype x Sex x Treatment	1.752	0.3384	ns	No				Genotype x Sex x Treatment	0.1382	0.7806	ns	No
	ANOVA table	SS (Type III)	DF	MS	F (DFn, DFd)	P value			ANOVA table	SS (Type III)	DF	MS	F (DFn, DFd)	P value			ANOVA table	SS (Type III)	DF	MS	F (DFn, DFd)	P value			ANOVA table	SS (Type III)	DF	MS	F (DFn, DFd)	P value
	Genotype	0.9554	1	0.9554	F (1, 39) = 1.814	P=0.1858			Genotype	20.06	1	20.06	F (1, 39) = 0.9217	P=0.3429			Genotype	10.12	1	10.12	F (1, 39) = 0.2221	P=0.6401			Genotype	1.327	1	1.327	F (1, 39) = 0.04998	P=0.8243
	Sex	0.7103	1	0.7103	F (1, 39) = 1.349	P=0.2526			Sex	33.21	1	33.21	F (1, 39) = 1.526	P=0.2241			Sex	57.3	1	57.3	F (1, 39) = 1.257	P=0.2691			Sex	245.1	1	245.1	F (1, 39) = 9.229	P=0.0042
	Treatment	0.7103	1	0.7103	F (1, 39) = 1.349	P=0.2526			Treatment	211.4	1	211.4	F (1, 39) = 9.715	P=0.0034			Treatment	180.9	1	180.9	F (1, 39) = 3.968	P=0.0534			Treatment	2.969	1	2.969	F (1, 39) = 0.1118	P=0.7399
	Genotype x Sex	0.7103	1	0.7103	F (1, 39) = 1.349	P=0.2526			Genotype x Sex	68.98	1	68.98	F (1, 39) = 3.170	P=0.0828			Genotype x Sex	26.89	1	26.89	F (1, 39) = 0.5901	P=0.4470			Genotype x Sex	29.52	1	29.52	F (1, 39) = 1.112	P=0.2982
	Genotype x Treatment	0.7103	1	0.7103	F (1, 39) = 1.349	P=0.2526			Genotype x Treatment	33.09	1	33.09	F (1, 39) = 1.521	P=0.2249			Genotype x Treatment	19.37	1	19.37	F (1, 39) = 0.4250	P=0.5183			Genotype x Treatment	3.922	1	3.922	F (1, 39) = 0.1477	P=0.7028
	Sex x Treatment	0.9554	1	0.9554	F (1, 39) = 1.814	P=0.1858			Sex x Treatment	33.9	1	33.9	F (1, 39) = 1.558	P=0.2194			Sex x Treatment	296.9	1	296.9	F (1, 39) = 6.513	P=0.0147			Sex x Treatment	119	1	119	F (1, 39) = 4.482	P=0.0407
	Genotype x Sex x Treatment	0.9554	1	0.9554	F (1, 39) = 1.814	P=0.1858			Genotype x Sex x Treatment	21.25	1	21.25	F (1, 39) = 0.9765	P=0.3292			Genotype x Sex x Treatment	42.82	1	42.82	F (1, 39) = 0.9393	P=0.3384			Genotype x Sex x Treatment	2.089	1	2.089	F (1, 39) = 0.07868	P=0.7806
	Residual	20.54	39	0.5267					Residual	848.7	39	21.76					Residual	1778	39	45.58					Residual	1036	39	26.55

## Sheet: FIG5S1 W2
Fiber Type Distribution (%) - W2
	Type 1								Type 2A								Type 2B								Type 2x
WT SHM M	0	0	0	0					15.57	16.43	17.59	18.07					57.79	57.34	62.5	48.32					26.64	26.22	19.91	33.61
IKK SHM M	0	0	5.29	0	0	0	0		10.42	17.6	14.9	18.69	20.08	22.27	22.55		65.47	63.3	65.38	57.01	43.31	56.72	46.41		24.1	19.1	14.42	24.3	36.61	21.01	31.05
WT TEN M	0	0	0	0	0	0			9.73	21.03	25.44	18.11	17.06	16.98			67.11	56.9	46.64	55.51	53.58	56.79			23.15	22.07	27.92	26.38	29.35	26.23
IKK TEN M	0	0		0	0	0	0		14.16	21.94		14.29	15.67	11.95	11.79		58.85	54.19		61.73	63.67	59.36	65.04		26.99	23.87		23.98	20.67	28.69	23.17
WT SHM F	0	0	0	0					13.54	19.11	17.65	17.13					63.11	59.56	56.86	52.81					23.34	21.33	25.49	30.06
IKK SHM F	0.3	0	0	0	0				26.71	7.27	23.8	15.73	19.01				61.13	65.76	55.52	61.33	57.39				11.87	26.97	20.68	22.93	23.59
WT TEN F		0	0	0	0	0	0			26.35	26.07	22.53	17.66	25	18.38			48.99	44.55	62.28	52.72	54.76	59.56			24.66	29.37	15.19	29.62	20.24	22.06
IKK TEN F	0	0	0	0	0.54	0	0		19.3	0	17.48	18.32	20.65	17.93	15.03		51.93	67.21	61.65	55.56	43.48	61.11	67.92		28.77	32.79	20.87	26.13	35.33	20.96	17.05
	Type 1								Type 2A								Type 2B								Type 2X
	Three-way ANOVA	Ordinary							Three-way ANOVA	Ordinary							Three-way ANOVA	Ordinary							Three-way ANOVA	Ordinary
	Alpha	0.05							Alpha	0.05							Alpha	0.05							Alpha	0.05
	Source of Variation	% of total variation	P value	P value summary	Significant?				Source of Variation	% of total variation	P value	P value summary	Significant?				Source of Variation	% of total variation	P value	P value summary	Significant?				Source of Variation	% of total variation	P value	P value summary	Significant?
	Genotype	1.949	0.372	ns	No				Genotype	3.157	0.2343	ns	No				Genotype	4.699	0.1715	ns	No				Genotype	1.335	0.4668	ns	No
	Sex	0.9355	0.5351	ns	No				Sex	1.761	0.3724	ns	No				Sex	0.01663	0.9343	ns	No				Sex	1.748	0.4055	ns	No
	Treatment	1.334	0.4594	ns	No				Treatment	0.04344	0.888	ns	No				Treatment	0.2853	0.7331	ns	No				Treatment	0.4035	0.6884	ns	No
	Genotype x Sex	0.9355	0.5351	ns	No				Genotype x Sex	0.7241	0.5661	ns	No				Genotype x Sex	0.1498	0.8047	ns	No				Genotype x Sex	0.2522	0.7511	ns	No
	Genotype x Treatment	1.334	0.4594	ns	No				Genotype x Treatment	9.731	0.0405	*	Yes				Genotype x Treatment	1.532	0.431	ns	No				Genotype x Treatment	2.922	0.2837	ns	No
	Sex x Treatment	1.46	0.439	ns	No				Sex x Treatment	1.318	0.4396	ns	No				Sex x Treatment	3.152	0.2607	ns	No				Sex x Treatment	0.8034	0.5719	ns	No
	Genotype x Sex x Treatment	1.46	0.439	ns	No				Genotype x Sex x Treatment	1.177	0.465	ns	No				Genotype x Sex x Treatment	0.09369	0.845	ns	No				Genotype x Sex x Treatment	1.606	0.4251	ns	No
	ANOVA table	SS (Type III)	DF	MS	F (DFn, DFd)	P value			ANOVA table	SS (Type III)	DF	MS	F (DFn, DFd)	P value			ANOVA table	SS (Type III)	DF	MS	F (DFn, DFd)	P value			ANOVA table	SS (Type III)	DF	MS	F (DFn, DFd)	P value
	Genotype	0.5366	1	0.5366	F (1, 37) = 0.8167	P=0.3720			Genotype	37.08	1	37.08	F (1, 37) = 1.462	P=0.2343			Genotype	88.04	1	88.04	F (1, 37) = 1.945	P=0.1715			Genotype	16.15	1	16.15	F (1, 37) = 0.5406	P=0.4668
	Sex	0.2575	1	0.2575	F (1, 37) = 0.3920	P=0.5351			Sex	20.68	1	20.68	F (1, 37) = 0.8154	P=0.3724			Sex	0.3116	1	0.3116	F (1, 37) = 0.006883	P=0.9343			Sex	21.14	1	21.14	F (1, 37) = 0.7079	P=0.4055
	Treatment	0.3672	1	0.3672	F (1, 37) = 0.5589	P=0.4594			Treatment	0.5102	1	0.5102	F (1, 37) = 0.02011	P=0.8880			Treatment	5.346	1	5.346	F (1, 37) = 0.1181	P=0.7331			Treatment	4.88	1	4.88	F (1, 37) = 0.1634	P=0.6884
	Genotype x Sex	0.2575	1	0.2575	F (1, 37) = 0.3920	P=0.5351			Genotype x Sex	8.505	1	8.505	F (1, 37) = 0.3353	P=0.5661			Genotype x Sex	2.807	1	2.807	F (1, 37) = 0.06200	P=0.8047			Genotype x Sex	3.05	1	3.05	F (1, 37) = 0.1021	P=0.7511
	Genotype x Treatment	0.3672	1	0.3672	F (1, 37) = 0.5589	P=0.4594			Genotype x Treatment	114.3	1	114.3	F (1, 37) = 4.505	P=0.0405			Genotype x Treatment	28.7	1	28.7	F (1, 37) = 0.6340	P=0.4310			Genotype x Treatment	35.34	1	35.34	F (1, 37) = 1.183	P=0.2837
	Sex x Treatment	0.402	1	0.402	F (1, 37) = 0.6119	P=0.4390			Sex x Treatment	15.48	1	15.48	F (1, 37) = 0.6104	P=0.4396			Sex x Treatment	59.05	1	59.05	F (1, 37) = 1.304	P=0.2607			Sex x Treatment	9.716	1	9.716	F (1, 37) = 0.3253	P=0.5719
	Genotype x Sex x Treatment	0.402	1	0.402	F (1, 37) = 0.6119	P=0.4390			Genotype x Sex x Treatment	13.82	1	13.82	F (1, 37) = 0.5450	P=0.4650			Genotype x Sex x Treatment	1.755	1	1.755	F (1, 37) = 0.03878	P=0.8450			Genotype x Sex x Treatment	19.43	1	19.43	F (1, 37) = 0.6505	P=0.4251
	Residual	24.31	37	0.657					Residual	938.6	37	25.37					Residual	1675	37	45.27					Residual	1105	37	29.87

## Sheet: FIG5S1 W8
Fiber Type Distribution (%) - W8
	Type 1								Type 2A								Type 2B								Type 2x
WT SHM M	0	0.43	0	0	0	0	0	0.4	26.82	17.09	13.9	15.27	30.27	28.62	15.02	15.48	45.25	55.98	60.23	58.02	54.41	28.94	54.94	54.37	27.93	26.5	25.87	26.72	15.33	42.44	30.04	29.76
IKK SHM M	0	0	0	0	0	0			16.09	23.61	16.87	18.64	21.52	13.48			57.85	52.31	56.22	62.01	54.01	56.93			26.05	24.07	26.91	19.35	24.47	29.59
WT TEN M	0	0	0	1.19	0	0	0		19.03	24.3	30	20	16.15	13.88	18.85		56.34	57.63	52.41	48.36	50	67.35	54.62		24.63	18.07	17.59	30.45	33.85	18.78	26.54
IKK TEN M	0	0	0	0		0.39	0.44		16.42	16.02	16.55	18.95		19.84	20.89		61.57	67.97	63.79	50.53		51.36	55.11		22.01	16.02	19.66	30.53		28.4	23.56
WT SHM F	0	0	0	0	1.05	0	0.34		19.5	19.88	19.6	16.29	26.32	22.32	23.49		53.55	46.89	51.7	56.68	40.7	53.21	49.66		26.95	33.23	28.69	27.04	31.93	24.46	26.51
IKK SHM F	0.7	0	0	0	5.1	0			20.77	20.21	14.63	19.32	30.61	27.96			51.41	52.13	61.67	55.25	39.8	45.72			27.11	27.66	23.69	25.42	24.49	26.32
WT TEN F		0	0.36	0	0	0	0		26.42	23.66	24.25	24.38	34.7	14.59			48.68	50.54	59.33	53.09	45.76	57.3			24.91	25.45	16.42	22.53	19.54	28.11
IKK TEN F	0	0	0	2.26	0	0	0		24.22	29.02	34.13	31.08	30.75	30.47	24.65		54.13	39.22	42.22	48.62	47.37	45.16	52.08		21.65	31.76	23.65	18.05	21.88	24.37	23.26
	Type 1								Type 2A								Type 2B								Type 2X
	Three-way ANOVA	Ordinary							Three-way ANOVA	Ordinary							Three-way ANOVA	Ordinary							Three-way ANOVA	Ordinary
	Alpha	0.05							Alpha	0.05							Alpha	0.05							Alpha	0.05
	Source of Variation	% of total variation	P value	P value summary	Significant?				Source of Variation	% of total variation	P value	P value summary	Significant?				Source of Variation	% of total variation	P value	P value summary	Significant?				Source of Variation	% of total variation	P value	P value summary	Significant?
	Genotype	2.051	0.3098	ns	No				Genotype	0.1157	0.7774	ns	No				Genotype	0.3501	0.6517	ns	No				Genotype	2.11	0.2917	ns	No
	Sex	3.301	0.1992	ns	No				Sex	18.88	0.0007	***	Yes				Sex	13.62	0.0069	**	Yes				Sex	0.004068	0.9628	ns	No
	Treatment	0.854	0.5108	ns	No				Treatment	4.977	0.0687	ns	No				Treatment	0.4121	0.6244	ns	No				Treatment	11.03	0.0187	*	Yes
	Genotype x Sex	3.48	0.1876	ns	No				Genotype x Sex	4.562	0.0809	ns	No				Genotype x Sex	5.25	0.0852	ns	No				Genotype x Sex	0.2428	0.7191	ns	No
	Genotype x Treatment	0.4799	0.6217	ns	No				Genotype x Treatment	0.441	0.5815	ns	No				Genotype x Treatment	2	0.2831	ns	No				Genotype x Treatment	1.805	0.329	ns	No
	Sex x Treatment	2.492	0.2636	ns	No				Sex x Treatment	5.471	0.0567	ns	No				Sex x Treatment	1.735	0.3171	ns	No				Sex x Treatment	0.3355	0.6726	ns	No
	Genotype x Sex x Treatment	0.8526	0.5112	ns	No				Genotype x Sex x Treatment	0.6057	0.5186	ns	No				Genotype x Sex x Treatment	0.5582	0.569	ns	No				Genotype x Sex x Treatment	0.09201	0.8247	ns	No
	ANOVA table	SS (Type III)	DF	MS	F (DFn, DFd)	P value			ANOVA table	SS (Type III)	DF	MS	F (DFn, DFd)	P value			ANOVA table	SS (Type III)	DF	MS	F (DFn, DFd)	P value			ANOVA table	SS (Type III)	DF	MS	F (DFn, DFd)	P value
	Genotype	0.6572	1	0.6572	F (1, 45) = 1.055	P=0.3098			Genotype	2.021	1	2.021	F (1, 45) = 0.08088	P=0.7774			Genotype	9.242	1	9.242	F (1, 45) = 0.2065	P=0.6517			Genotype	27.94	1	27.94	F (1, 45) = 1.138	P=0.2917
	Sex	1.058	1	1.058	F (1, 45) = 1.698	P=0.1992			Sex	329.7	1	329.7	F (1, 45) = 13.20	P=0.0007			Sex	359.5	1	359.5	F (1, 45) = 8.034	P=0.0069			Sex	0.05386	1	0.05386	F (1, 45) = 0.002194	P=0.9628
	Treatment	0.2736	1	0.2736	F (1, 45) = 0.4393	P=0.5108			Treatment	86.91	1	86.91	F (1, 45) = 3.479	P=0.0687			Treatment	10.88	1	10.88	F (1, 45) = 0.2431	P=0.6244			Treatment	146.1	1	146.1	F (1, 45) = 5.949	P=0.0187
	Genotype x Sex	1.115	1	1.115	F (1, 45) = 1.790	P=0.1876			Genotype x Sex	79.66	1	79.66	F (1, 45) = 3.188	P=0.0809			Genotype x Sex	138.6	1	138.6	F (1, 45) = 3.097	P=0.0852			Genotype x Sex	3.215	1	3.215	F (1, 45) = 0.1309	P=0.7191
	Genotype x Treatment	0.1538	1	0.1538	F (1, 45) = 0.2469	P=0.6217			Genotype x Treatment	7.701	1	7.701	F (1, 45) = 0.3082	P=0.5815			Genotype x Treatment	52.81	1	52.81	F (1, 45) = 1.180	P=0.2831			Genotype x Treatment	23.91	1	23.91	F (1, 45) = 0.9738	P=0.3290
	Sex x Treatment	0.7983	1	0.7983	F (1, 45) = 1.282	P=0.2636			Sex x Treatment	95.55	1	95.55	F (1, 45) = 3.824	P=0.0567			Sex x Treatment	45.81	1	45.81	F (1, 45) = 1.024	P=0.3171			Sex x Treatment	4.443	1	4.443	F (1, 45) = 0.1810	P=0.6726
	Genotype x Sex x Treatment	0.2731	1	0.2731	F (1, 45) = 0.4386	P=0.5112			Genotype x Sex x Treatment	10.58	1	10.58	F (1, 45) = 0.4234	P=0.5186			Genotype x Sex x Treatment	14.74	1	14.74	F (1, 45) = 0.3293	P=0.5690			Genotype x Sex x Treatment	1.218	1	1.218	F (1, 45) = 0.04963	P=0.8247
	Residual	28.02	45	0.6228					Residual	1124	45	24.99					Residual	2014	45	44.75					Residual	1105	45	24.55
