# Supplementary material for: Tenotomy-induced muscle atrophy is sex-specific and independent of NFκB
Source: eLife journal article supplement (doi:10.7554/elife.82016), 2022-12-12
Supplement: supp [file elife-82016-supp-v1.zip › elife_poa_e82016_Figure_5_source_data_1.xlsx]

## Sheet: FIG5B
Fiber Type Distributions (Freq); W8 MALE
Type 2A
um^2	WT SHM							WT TEN							IKKmkd SHM							IKKmkd TEN
200	0	0	0	0	1.13636	0	0	0	0	0	1.49254	0	0		0	0	0	2.17391	0	0		0	2.5	0	0	2.12766
400	7.5	8.33333	10.2564	6.57895	7.95455	2.7027	0	4	6.84932	4.70588	1.49254	3.0303	2.5		14.2857	4	0	13.0435	1.96078	11.1111		0	5	6.66667	0	0
600	25	22.2222	43.5897	18.4211	20.4545	37.8378	26.3158	20	10.9589	5.88235	14.9254	3.0303	5		23.8095	10	30.9524	32.6087	13.7255	25		2.32558	12.5	11.1111	3.92157	2.12766
800	30	33.3333	28.2051	26.3158	23.8636	27.027	28.9474	14	10.9589	20	19.403	18.1818	27.5		19.0476	12	21.4286	28.2609	25.4902	30.5556		9.30233	17.5	17.7778	11.7647	0
1000	17.5	33.3333	7.69231	28.9474	15.9091	24.3243	23.6842	30	24.6575	27.0588	20.8955	18.1818	27.5		30.9524	30	14.2857	17.3913	17.6471	25		27.907	20	17.7778	15.6863	2.12766
1200	2.5	2.77778	7.69231	9.21053	9.09091	5.40541	13.1579	12	19.1781	17.6471	11.9403	9.09091	12.5		11.9048	22	21.4286	2.17391	9.80392	5.55556		20.9302	7.5	11.1111	13.7255	23.4043
1400	12.5	0	2.5641	6.57895	11.3636	0	2.63158	6	5.47945	15.2941	11.9403	27.2727	5		0	20	7.14286	2.17391	17.6471	2.77778		9.30233	10	13.3333	13.7255	19.1489
1600	0	0	0	1.31579	7.95455	2.7027	0	4	5.47945	5.88235	4.47761	0	12.5		0	2	2.38095	0	3.92157	0		4.65116	7.5	8.88889	17.6471	10.6383
1800	2.5	0	0	1.31579	1.13636	0	5.26316	10	8.21918	3.52941	5.97015	3.0303	0		0	0	0	0	5.88235	0		13.9535	7.5	2.22222	9.80392	12.766
2000	2.5	0	0	0	1.13636	0	0	0	5.47945	0	2.98507	9.09091	5		0	0	0	0	1.96078	0		2.32558	2.5	4.44444	7.84314	12.766
2200	0	0	0	1.31579	0	0	0	0	2.73973	0	1.49254	0	0		0	0	2.38095	0	1.96078	0		9.30233	5	2.22222	0	6.38298
2400	0	0	0	0	0	0	0	0	0	0	1.49254	3.0303	2.5		0	0	0	0	0	0		0	2.5	0	3.92157	4.25532
2600	0	0	0	0	0	0	0	0	0	0	1.49254	0	0		0	0	0	0	0	0		0	0	2.22222	1.96078	2.12766
2800	0	0	0	0	0	0	0	0	0	0	0	6.06061	0		0	0	0	0	0	0		0	0	2.22222	0	0
3000	0	0	0	0	0	0	0	0	0	0	0	0	0		0	0	0	0	0	0		0	0	0	0	0
3200	0	0	0	0	0	0	0	0	0	0	0	0	0		0	0	0	0	0	0		0	0	0	0	0
3400	0	0	0	0	0	0	0	0	0	0	0	0	0		0	0	0	0	0	0		0	0	0	0	0
3600	0	0	0	0	0	0	0	0	0	0	0	0	0		0	0	0	0	0	0		0	0	0	0	0
3800	0	0	0	0	0	0	0	0	0	0	0	0	0		0	0	0	0	0	0		0	0	0	0	2.12766
4000	0	0	0	0	0	0	0	0	0	0	0	0	0		0	0	0	2.17391	0	0		0	0	0	0	0
4200	0	0	0	0	0	0	0	0	0	0	0	0	0		0	0	0	0	0	0		0	0	0	0	0
4400	0	0	0	0	0	0	0	0	0	0	0	0	0		0	0	0	0	0	0		0	0	0	0	0
4600	0	0	0	0	0	0	0	0	0	0	0	0	0		0	0	0	0	0	0		0	0	0	0	0
4800	0	0	0	0	0	0	0	0	0	0	0	0	0		0	0	0	0	0	0		0	0	0	0	0
5000	0	0	0	0	0	0	0	0	0	0	0	0	0		0	0	0	0	0	0		0	0	0	0	0
Type 2X
um^2	WT SHM							WT TEN							IKKmkd SHM							IKKmkd TEN
0	0	0	0	0	0	0	0	0	0	0	0	0	0		0	0	0	0	0	0		0	0	0	0	0	0
200	0	1.49254	0	0	0.833333	0	0	0	0	0	0	0	0		0	0	0	0	0	0		1.78571	0	0	0	0	0
400	0	1.49254	0	0	1.66667	0	1.33333	0	0	0	0.990099	0	0		0	0	0	0	3.50877	5.33333		0	0	0	0	2.04082	1.75439
600	1.6129	1.49254	1.42857	0	1.66667	0	1.33333	1.5873	5.45455	4.16667	9.90099	5	0		0	0	0	1.85185	1.75439	5.33333		5.35714	2.43902	3.7037	2.8169	2.04082	0
800	1.6129	1.49254	1.42857	0	5.83333	6.75676	0	1.5873	7.27273	2.08333	10.8911	5	1.44928		0	1.92308	1.53846	1.85185	5.26316	5.33333		14.2857	4.87805	16.6667	5.6338	6.12245	1.75439
1000	4.83871	19.403	11.4286	0	8.33333	16.2162	4	4.7619	14.5455	10.4167	21.7822	7.5	4.34783		4.47761	0	9.23077	1.85185	7.01754	10.6667		19.6429	7.31707	31.4815	12.6761	6.12245	1.75439
1200	12.9032	11.9403	14.2857	7.89474	12.5	13.5135	13.3333	7.93651	12.7273	14.5833	5.94059	5	14.4928		10.4478	5.76923	15.3846	7.40741	14.0351	12		1.78571	12.1951	5.55556	11.2676	8.16327	14.0351
1400	19.3548	11.9403	14.2857	28.9474	15	10.8108	9.33333	3.1746	10.9091	8.33333	10.8911	5	11.5942		13.4328	5.76923	10.7692	18.5185	10.5263	8		5.35714	12.1951	3.7037	8.4507	12.2449	7.01754
1600	20.9677	13.4328	17.1429	18.4211	11.6667	9.45946	16	15.873	14.5455	8.33333	8.91089	5	11.5942		13.4328	7.69231	10.7692	22.2222	10.5263	13.3333		0	14.6341	5.55556	4.22535	10.2041	10.5263
1800	19.3548	10.4478	17.1429	10.5263	13.3333	14.8649	16	11.1111	7.27273	16.6667	8.91089	12.5	23.1884		17.9104	15.3846	16.9231	16.6667	12.2807	10.6667		1.78571	7.31707	7.40741	5.6338	14.2857	1.75439
2000	8.06452	11.9403	11.4286	15.7895	12.5	12.1622	22.6667	4.7619	3.63636	12.5	6.93069	12.5	14.4928		20.8955	9.61538	10.7692	11.1111	7.01754	14.6667		5.35714	9.7561	7.40741	2.8169	2.04082	7.01754
2200	6.45161	1.49254	2.85714	5.26316	7.5	6.75676	6.66667	17.4603	3.63636	6.25	3.9604	5	5.7971		8.95522	23.0769	6.15385	9.25926	12.2807	6.66667		3.57143	0	1.85185	7.04225	4.08163	3.50877
2400	0	4.47761	7.14286	13.1579	4.16667	5.40541	5.33333	6.34921	3.63636	8.33333	4.9505	7.5	5.7971		5.97015	17.3077	4.61538	3.7037	8.77193	5.33333		10.7143	9.7561	1.85185	8.4507	8.16327	14.0351
2600	0	5.97015	1.42857	0	2.5	0	4	7.93651	5.45455	6.25	3.9604	12.5	4.34783		1.49254	0	4.61538	1.85185	5.26316	0		1.78571	4.87805	1.85185	12.6761	8.16327	8.77193
2800	0	0	0	0	1.66667	1.35135	0	7.93651	1.81818	0	0	7.5	1.44928		1.49254	7.69231	6.15385	3.7037	0	1.33333		10.7143	7.31707	0	8.4507	2.04082	3.50877
3000	3.22581	1.49254	0	0	0	2.7027	0	4.7619	1.81818	2.08333	0	2.5	0		1.49254	0	3.07692	0	1.75439	1.33333		8.92857	2.43902	3.7037	5.6338	2.04082	7.01754
3200	0	1.49254	0	0	0.833333	0	0	1.5873	1.81818	0	0.990099	5	1.44928		0	3.84615	0	0	0	0		1.78571	0	3.7037	1.40845	2.04082	5.26316
3400	1.6129	0	0	0	0	0	0	1.5873	5.45455	0	0.990099	2.5	0		0	1.92308	0	0	0	0		3.57143	2.43902	1.85185	2.8169	4.08163	1.75439
3600	0	0	0	0	0	0	0	1.5873	0	0	0	0	0		0	0	0	0	0	0		1.78571	0	1.85185	0	2.04082	0
3800	0	0	0	0	0	0	0	0	0	0	0	0	0		0	0	0	0	0	0		1.78571	0	0	0	2.04082	3.50877
4000	0	0	0	0	0	0	0	0	0	0	0	0	0		0	0	0	0	0	0		0	0	1.85185	0	2.04082	3.50877
4200	0	0	0	0	0	0	0	0	0	0	0	0	0		0	0	0	0	0	0		0	2.43902	0	0	0	1.75439
4400	0	0	0	0	0	0	0	0	0	0	0	0	0		0	0	0	0	0	0		0	0	0	0	0	0
4600	0	0	0	0	0	0	0	0	0	0	0	0	0		0	0	0	0	0	0		0	0	0	0	0	1.75439
4800	0	0	0	0	0	0	0	0	0	0	0	0	0		0	0	0	0	0	0		0	0	0	0	0	0
5000	0	0	0	0	0	0	0	0	0	0	0	0	0		0	0	0	0	0	0		0	0	0	0	0	0
Type 2B
um^2	WT SHM							WT TEN							IKKmkd SHM							IKKmkd TEN
0	0	0	0	0	0	0	0	0	0	0	0	0	0		0.704225	0	0	0	0	0		0	0	0	0	0
200	0	0	0	0	1.19048	0	0	0	0	0	0.625	1.37931	0		0	0.943396	0.740741	0	0.833333	0		0.757576	0.704225	0	0	0.900901
400	0	0	6.77966	1.45985	3.57143	0.735294	0	0.746269	1.22699	0	0	1.37931	0		0	0	0	0	0	0.694444		0.757576	0	2.45399	0	0.900901
600	0	0	25.4237	0	0	0	0	0.746269	2.45399	0	0	3.44828	0		0	0.943396	0.740741	1.21951	0	1.38889		0	1.40845	4.90798	0	0
800	0	0	13.5593	1.45985	2.38095	0	0	2.23881	6.74847	2.98507	2.5	7.58621	0		0	0	0.740741	1.21951	0.833333	0		2.27273	3.52113	6.74847	0.806452	0
1000	0	0	5.08475	1.45985	2.38095	0	0	1.49254	6.13497	6.71642	6.25	8.27586	5.42636		0.704225	0.943396	2.22222	3.65854	0.833333	1.38889		5.30303	1.40845	5.52147	6.45161	1.8018
1200	0	6.57895	3.38983	2.18978	0	0.735294	0.806452	6.71642	6.13497	9.70149	5	11.0345	6.20155		0	0.943396	1.48148	1.82927	0.833333	4.86111		6.81818	2.11268	9.81595	4.03226	2.7027
1400	0.769231	5.92105	1.69492	3.64964	4.7619	5.14706	3.22581	4.47761	15.9509	11.9403	5	7.58621	7.75194		4.22535	2.83019	4.44444	6.09756	1.66667	5.55556		13.6364	7.04225	6.74847	7.25806	7.20721
1600	4.61538	6.57895	1.69492	7.29927	5.95238	5.14706	9.67742	13.4328	15.9509	8.20896	12.5	9.65517	7.75194		5.6338	5.66038	5.18519	9.7561	5	7.63889		7.57576	8.4507	12.2699	12.0968	12.6126
1800	7.69231	4.60526	5.08475	13.1387	8.33333	8.08824	12.0968	8.95522	12.2699	15.6716	9.375	4.82759	10.8527		8.4507	7.54717	14.0741	8.53659	5	7.63889		10.6061	11.2676	8.58896	11.2903	5.40541
2000	9.23077	11.1842	6.77966	13.8686	15.4762	11.7647	16.9355	14.9254	10.4294	12.6866	8.75	6.89655	13.9535		9.85915	11.3208	8.14815	11.5854	1.66667	13.8889		12.8788	11.9718	9.20245	19.3548	9.90991
2200	9.23077	9.86842	6.77966	13.1387	9.52381	12.5	20.1613	9.70149	4.90798	11.9403	9.375	6.89655	13.9535		14.0845	16.9811	7.40741	15.2439	11.6667	11.1111		9.09091	4.92958	6.74847	11.2903	12.6126
2400	12.3077	9.86842	3.38983	10.219	5.95238	13.9706	14.5161	9.70149	4.29448	8.20896	14.375	2.75862	13.1783		8.4507	10.3774	17.037	17.6829	10.8333	9.02778		6.06061	16.1972	5.52147	7.25806	9.00901
2600	11.5385	12.5	0	8.0292	19.0476	11.7647	8.06452	5.22388	1.84049	3.73134	9.375	8.96552	13.9535		11.2676	6.60377	9.62963	6.70732	14.1667	12.5		4.54545	6.33803	4.29448	13.7097	8.10811
2800	14.6154	11.1842	6.77966	3.64964	7.14286	11.0294	3.22581	7.46269	1.22699	2.23881	7.5	6.2069	3.87597		10.5634	10.3774	8.88889	5.4878	12.5	8.33333		3.78788	8.4507	3.06748	2.41935	7.20721
3000	4.61538	7.23684	11.8644	7.29927	8.33333	9.55882	3.22581	3.73134	1.84049	4.47761	3.75	6.2069	0.775194		9.15493	8.49057	7.40741	4.87805	9.16667	7.63889		3.78788	4.92958	4.29448	3.22581	4.5045
3200	11.5385	4.60526	1.69492	3.64964	3.57143	5.14706	1.6129	3.73134	3.68098	0	3.125	2.75862	0.775194		5.6338	4.71698	6.66667	4.26829	10.8333	2.77778		6.81818	2.11268	2.45399	0.806452	4.5045
3400	5.38462	5.92105	0	4.37956	1.19048	2.94118	3.22581	5.22388	0.613497	1.49254	1.25	2.06897	0.775194		4.22535	2.83019	2.22222	1.21951	5.83333	2.08333		0.757576	2.11268	2.45399	0	3.6036
3600	3.84615	1.31579	0	2.91971	1.19048	0.735294	0.806452	1.49254	1.22699	0	0	0	0		4.22535	0.943396	1.48148	0	4.16667	0		1.51515	2.8169	0.613497	0	3.6036
3800	1.53846	0	0	1.45985	0	0	0	0	0.613497	0	0	0	0		2.8169	4.71698	0.740741	0.609756	2.5	2.08333		1.51515	2.11268	0.613497	0	1.8018
4000	1.53846	1.31579	0	0.729927	0	0.735294	0.806452	0	2.45399	0	0	1.37931	0		0	0.943396	0	0	0.833333	0.694444		0.757576	2.11268	0.613497	0	1.8018
4200	0.769231	0.657895	0	0	0	0	0.806452	0	0	0	1.25	0	0		0	0.943396	0	0	0	0.694444		0	0	0	0	0.900901
4400	0	0	0	0	0	0	0	0	0	0	0	0.689655	0.775194		0	0	0.740741	0	0.833333	0		0	0	0.613497	0	0
4600	0	0.657895	0	0	0	0	0.806452	0	0	0	0	0	0		0	0.943396	0	0	0	0		0.757576	0	1.22699	0	0
4800	0	0	0	0	0	0	0	0	0	0	0	0	0		0	0	0	0	0	0		0	0	0	0	0
5000	0.769231	0	0	0	0	0	0	0	0	0	0	0	0		0	0	0	0	0	0		0	0	1.22699	0	0.900901
Fiber Type Distributions; W8 FEMALE
Type 2A
um^2	WT SHM						WT TEN						IKKmkd SHM						IKKmkd TEN
200	0	0	0	2	0	2.85714	4.41176	15.3846	0	0	0	0	0	1.75439	4.7619	0	2.22222	0	0	0	0	0	1.20482	1.44928
400	7.27273	6.45161	11.7647	12	4.16667	20	7.35294	10.7692	3.22581	2.66667	3.22581	2.43902	5.26316	0	4.7619	5.26316	7.77778	2.46914	10.7143	3.8961	12.1951	2.7027	4.81928	11.5942
600	16.3636	16.129	17.6471	28	9.72222	32.8571	7.35294	3.07692	16.129	8	12.9032	17.0732	10.5263	10.5263	14.2857	36.8421	10	12.3457	14.2857	0	25.2033	18.018	9.63855	10.1449
800	29.0909	40.3226	29.4118	20	16.6667	25.7143	1.47059	13.8462	19.3548	2.66667	25.8065	31.7073	28.0702	15.7895	21.4286	22.807	27.7778	19.7531	20.2381	12.987	17.8862	19.8198	9.63855	20.2899
1000	16.3636	33.871	20.5882	20	23.6111	8.57143	8.82353	9.23077	11.2903	9.33333	16.129	12.1951	24.5614	21.0526	21.4286	15.7895	18.8889	19.7531	22.619	19.4805	21.9512	18.9189	14.4578	8.69565
1200	10.9091	1.6129	13.2353	12	16.6667	2.85714	11.7647	12.3077	20.9677	6.66667	17.7419	2.43902	14.0351	22.807	16.6667	8.77193	16.6667	12.3457	13.0952	20.7792	10.5691	19.8198	12.0482	15.942
1400	12.7273	1.6129	5.88235	4	8.33333	4.28571	11.7647	3.07692	9.67742	14.6667	14.5161	12.1951	7.01754	10.5263	9.52381	3.50877	8.88889	13.5802	9.52381	16.8831	5.69106	12.6126	13.253	14.4928
1600	3.63636	0	1.47059	2	1.38889	2.85714	7.35294	6.15385	12.9032	16	7.25806	4.87805	8.77193	10.5263	2.38095	3.50877	4.44444	7.40741	5.95238	7.79221	4.87805	2.7027	7.22892	7.24638
1800	3.63636	0	0	0	9.72222	0	13.2353	10.7692	4.83871	12	0.806452	2.43902	1.75439	5.26316	0	3.50877	1.11111	4.93827	2.38095	6.49351	0	4.5045	8.43373	4.34783
2000	0	0	0	0	2.77778	0	13.2353	6.15385	0	16	1.6129	7.31707	0	1.75439	2.38095	0	1.11111	6.17284	0	2.5974	0.813008	0.900901	7.22892	2.89855
2200	0	0	0	0	1.38889	0	4.41176	1.53846	1.6129	2.66667	0	2.43902	0	0	0	0	0	1.23457	0	2.5974	0.813008	0	3.61446	2.89855
2400	0	0	0	0	2.77778	0	4.41176	4.61538	0	6.66667	0	2.43902	0	0	0	0	1.11111	0	1.19048	2.5974	0	0	2.40964	0
2600	0	0	0	0	1.38889	0	1.47059	0	0	1.33333	0	0	0	0	2.38095	0	0	0	0	0	0	0	1.20482	0
2800	0	0	0	0	1.38889	0	0	1.53846	0	1.33333	0	0	0	0	0	0	0	0	0	1.2987	0	0	3.61446	0
3000	0	0	0	0	0	0	1.47059	1.53846	0	0	0	0	0	0	0	0	0	0	0	0	0	0	0	0
3200	0	0	0	0	0	0	0	0	0	0	0	0	0	0	0	0	0	0	0	2.5974	0	0	0	0
3400	0	0	0	0	0	0	1.47059	0	0	0	0	2.43902	0	0	0	0	0	0	0	0	0	0	1.20482	0
3600	0	0	0	0	0	0	0	0	0	0	0	0	0	0	0	0	0	0	0	0	0	0	0	0
3800	0	0	0	0	0	0	0	0	0	0	0	0	0	0	0	0	0	0	0	0	0	0	0	0
4000	0	0	0	0	0	0	0	0	0	0	0	0	0	0	0	0	0	0	0	0	0	0	0	0
4200	0	0	0	0	0	0	0	0	0	0	0	0	0	0	0	0	0	0	0	0	0	0	0	0
4400	0	0	0	0	0	0	0	0	0	0	0	0	0	0	0	0	0	0	0	0	0	0	0	0
4600	0	0	0	0	0	0	0	0	0	0	0	0	0	0	0	0	0	0	0	0	0	0	0	0
4800	0	0	0	0	0	0	0	0	0	0	0	0	0	0	0	0	0	0	0	0	0	0	0	0
5000	0	0	0	0	0	0	0	0	0	0	0	0	0	0	0	0	0	0	0	0	0	0	0	0
Type 2X
um^2	WT SHM							WT TEN							IKKmkd SHM							IKKmkd TEN
0	0	0	0	0	0	0	0	0	0	0	0	0	0	0	0	0	0	0	0	0	0	0	0	0	0	0	0
200	0	0	0	1.21951	1.20482	0	3.44828	0	0	2.89855	4.05405	0	0	0	0	0	0	0	0	0	0	0	0	0	0	0	0
400	0	1.13636	0	0	1.20482	0	10.3448	4.41176	0	10.1449	6.75676	1.35135	1.31579	0	0	0	1.51515	1.25	5.33333	4.34783	5.55556	3.84615	1.49254	1.6129	1.75439	2.04082	1.75439
600	2.7027	0	13.4831	2.43902	1.20482	0	10.3448	10.2941	0	7.24638	10.8108	5.40541	0	0	4.91803	0	4.54545	12.5	0	2.89855	11.1111	3.84615	1.49254	12.9032	0	2.04082	0
800	6.75676	1.13636	21.3483	9.7561	2.40964	3.79747	22.4138	8.82353	2.32558	8.69565	2.7027	10.8108	3.94737	2.5641	18.0328	9.33333	9.09091	15	12	11.5942	12.5	11.5385	4.47761	19.3548	1.75439	6.12245	1.75439
1000	9.45946	3.40909	15.7303	21.9512	10.8434	15.1899	15.5172	17.6471	2.32558	14.4928	6.75676	14.8649	15.7895	2.5641	6.55738	16	10.6061	3.75	12	13.0435	22.2222	12.8205	10.4478	19.3548	1.75439	6.12245	1.75439
1200	14.8649	17.0455	12.3596	17.0732	13.253	20.2532	10.3448	14.7059	18.6047	13.0435	5.40541	13.5135	15.7895	17.9487	11.4754	20	7.57576	7.5	4	14.4928	20.8333	10.2564	7.46269	4.83871	14.0351	8.16327	14.0351
1400	18.9189	34.0909	8.98876	12.1951	13.253	18.9873	3.44828	7.35294	20.9302	5.7971	16.2162	14.8649	11.8421	14.1026	13.1148	14.6667	21.2121	16.25	18.6667	14.4928	13.8889	21.7949	7.46269	3.22581	7.01754	12.2449	7.01754
1600	16.2162	20.4545	7.86517	18.2927	10.8434	17.7215	3.44828	8.82353	18.6047	1.44928	16.2162	8.10811	15.7895	24.359	6.55738	21.3333	18.1818	20	20	11.5942	4.16667	10.2564	11.9403	11.2903	10.5263	10.2041	10.5263
1800	9.45946	10.2273	3.37079	4.87805	16.8675	3.79747	1.72414	1.47059	9.30233	2.89855	14.8649	4.05405	6.57895	12.8205	14.7541	12	9.09091	2.5	10.6667	5.7971	6.94444	8.97436	4.47761	8.06452	1.75439	14.2857	1.75439
2000	10.8108	4.54545	7.86517	4.87805	8.43373	10.1266	3.44828	1.47059	11.6279	5.7971	8.10811	2.7027	11.8421	12.8205	13.1148	5.33333	12.1212	10	12	5.7971	2.77778	10.2564	16.4179	11.2903	7.01754	2.04082	7.01754
2200	8.10811	3.40909	1.1236	3.65854	4.81928	3.79747	0	4.41176	4.65116	5.7971	2.7027	8.10811	2.63158	6.41026	8.19672	0	4.54545	3.75	1.33333	5.7971	0	3.84615	10.4478	6.45161	3.50877	4.08163	3.50877
2400	2.7027	3.40909	3.37079	1.21951	4.81928	3.79747	1.72414	2.94118	6.97674	5.7971	4.05405	8.10811	2.63158	2.5641	0	0	0	3.75	4	1.44928	0	1.28205	5.97015	1.6129	14.0351	8.16327	14.0351
2600	0	1.13636	3.37079	2.43902	1.20482	2.53165	1.72414	0	2.32558	7.24638	1.35135	1.35135	3.94737	2.5641	0	1.33333	0	0	0	4.34783	0	0	10.4478	0	8.77193	8.16327	8.77193
2800	0	0	1.1236	0	4.81928	0	3.44828	1.47059	2.32558	2.89855	0	0	6.57895	1.28205	0	0	1.51515	3.75	0	1.44928	0	0	1.49254	0	3.50877	2.04082	3.50877
3000	0	0	0	0	2.40964	0	1.72414	4.41176	0	2.89855	0	2.7027	0	0	3.27869	0	0	0	0	0	0	0	4.47761	0	7.01754	2.04082	7.01754
3200	0	0	0	0	1.20482	0	3.44828	1.47059	0	1.44928	0	1.35135	0	0	0	0	0	0	0	2.89855	0	1.28205	1.49254	0	5.26316	2.04082	5.26316
3400	0	0	0	0	0	0	1.72414	4.41176	0	1.44928	0	0	1.31579	0	0	0	0	0	0	0	0	0	0	0	1.75439	4.08163	1.75439
3600	0	0	0	0	0	0	0	2.94118	0	0	0	2.7027	0	0	0	0	0	0	0	0	0	0	0	0	0	2.04082	0
3800	0	0	0	0	1.20482	0	0	1.47059	0	0	0	0	0	0	0	0	0	0	0	0	0	0	0	0	3.50877	2.04082	3.50877
4000	0	0	0	0	0	0	1.72414	0	0	0	0	0	0	0	0	0	0	0	0	0	0	0	0	0	3.50877	2.04082	3.50877
4200	0	0	0	0	0	0	0	0	0	0	0	0	0	0	0	0	0	0	0	0	0	0	0	0	1.75439	0	1.75439
4400	0	0	0	0	0	0	0	0	0	0	0	0	0	0	0	0	0	0	0	0	0	0	0	0	0	0	0
4600	0	0	0	0	0	0	0	1.47059	0	0	0	0	0	0	0	0	0	0	0	0	0	0	0	0	1.75439	0	1.75439
4800	0	0	0	0	0	0	0	0	0	0	0	0	0	0	0	0	0	0	0	0	0	0	0	0	0	0	0
5000	0	0	0	0	0	0	0	0	0	0	0	0	0	0	0	0	0	0	0	0	0	0	0	0	0	0	0
Type 2B
um^2	WT SHM						WT TEN						IKKmkd SHM						IKKmkd TEN
200	0.694444	0	0	0	0	0	0	0	0	1.28205	0	0	0	0	0	0	0	0.819672	1.14943	1.5873	0	0	0.917431	0
400	0.694444	0	0	0	0	0	0	0.78125	0	0	1.79641	0	0	0	0	0	1.9802	0.819672	0.574713	1.5873	0	1.05263	0	1.86916
600	0.694444	0	1.68539	0	0	0	0.847458	0.78125	1.44928	6.41026	4.79042	0.657895	0.714286	0	1.97368	0	0	2.45902	1.14943	2.38095	4.27807	5.26316	1.83486	1.86916
800	2.77778	0	2.24719	0	0.952381	2.51572	4.23729	3.90625	2.17391	6.41026	0	1.97368	0	0	4.60526	1.25	0	4.09836	5.74713	2.38095	5.88235	8.42105	1.83486	3.73832
1000	6.25	1.40845	7.30337	2.40964	2.85714	5.66038	11.0169	5.46875	5.7971	10.2564	1.79641	2.63158	4.28571	1.36986	3.28947	3.125	1.9802	7.37705	10.9195	2.38095	11.7647	18.9474	9.17431	10.2804
1200	9.02778	9.15493	7.30337	6.62651	4.7619	8.80503	14.4068	11.7188	2.17391	10.2564	2.99401	6.57895	4.28571	4.10959	6.57895	6.25	5.94059	9.01639	14.3678	8.73016	14.9733	9.47368	1.83486	10.2804
1400	11.1111	20.4225	15.7303	12.6506	9.52381	11.9497	13.5593	11.7188	2.17391	13.4615	5.38922	12.5	7.14286	6.84932	8.55263	6.875	5.94059	13.9344	20.6897	7.93651	18.1818	11.5789	8.25688	9.34579
1600	9.02778	17.6056	10.1124	12.6506	12.381	14.4654	12.7119	8.59375	10.1449	10.2564	11.3772	13.8158	9.28571	10.274	9.21053	15.625	14.8515	9.83607	19.5402	12.6984	13.9037	10.5263	9.17431	16.8224
1800	9.02778	12.6761	15.7303	13.253	14.2857	17.6101	15.2542	11.7188	10.8696	12.8205	9.58084	20.3947	11.4286	15.0685	8.55263	16.875	11.8812	14.7541	9.1954	18.254	12.2995	11.5789	7.33945	12.1495
2000	8.33333	9.85915	12.9213	12.6506	9.52381	10.0629	5.9322	14.8438	13.0435	8.97436	10.7784	8.55263	12.1429	12.3288	15.1316	15	9.90099	7.37705	9.77011	15.0794	9.62567	12.6316	12.844	11.215
2200	9.72222	10.5634	8.98876	13.8554	10.4762	9.43396	6.77966	8.59375	6.52174	5.76923	14.3713	10.5263	14.2857	15.7534	15.7895	14.375	12.8713	9.01639	1.72414	6.34921	3.74332	5.26316	3.66972	7.47664
2400	5.55556	7.04225	8.98876	13.253	11.4286	6.91824	2.54237	3.125	10.1449	4.48718	13.1737	8.55263	11.4286	13.6986	9.86842	6.875	16.8317	6.55738	2.29885	5.55556	3.74332	4.21053	9.17431	3.73832
2600	6.25	6.33803	4.49438	6.0241	8.57143	5.66038	2.54237	3.125	7.97101	1.92308	9.58084	3.94737	14.2857	12.3288	9.21053	5	6.93069	2.45902	1.72414	7.14286	1.60428	1.05263	18.3486	2.80374
2800	4.16667	2.11268	3.37079	3.61446	5.71429	3.77358	2.54237	3.90625	11.5942	3.20513	7.18563	2.63158	6.42857	2.73973	3.94737	4.375	3.9604	4.09836	0.574713	1.5873	0	0	7.33945	1.86916
3000	3.47222	2.11268	0.561798	1.20482	4.7619	1.88679	0.847458	3.90625	4.34783	1.28205	1.79641	2.63158	0.714286	5.47945	0.657895	1.875	2.9703	4.09836	0.574713	2.38095	0	0	3.66972	1.86916
3200	2.77778	0.704225	0	0	1.90476	0	0.847458	0.78125	3.62319	0.641026	2.39521	0.657895	0.714286	0	0.657895	1.25	1.9802	0.819672	0	0	0	0	1.83486	2.80374
3400	4.16667	0	0.561798	0.60241	2.85714	0.628931	0	3.125	1.44928	1.28205	0.598802	0.657895	2.14286	0	1.31579	1.25	0.990099	0.819672	0	0	0	0	0	0
3600	0	0	0	1.20482	0	0	3.38983	2.34375	4.34783	0	1.1976	1.31579	0	0	0	0	0	0.819672	0	0.793651	0	0	1.83486	1.86916
3800	2.77778	0	0	0	0	0.628931	1.69492	0	0	0	1.1976	0.657895	0	0	0.657895	0	0.990099	0	0	1.5873	0	0	0.917431	0
4000	0.694444	0	0	0	0	0	0.847458	0.78125	1.44928	1.28205	0	1.31579	0	0	0	0	0	0	0	0	0	0	0	0
4200	2.08333	0	0	0	0	0	0	0	0	0	0	0	0	0	0	0	0	0.819672	0	0.793651	0	0	0	0
4400	0.694444	0	0	0	0	0	0	0	0	0	0	0	0	0	0	0	0	0	0	0.793651	0	0	0	0
4600	0	0	0	0	0	0	0	0	0.724638	0	0	0	0	0	0	0	0	0	0	0	0	0	0	0
4800	0	0	0	0	0	0	0	0	0	0	0	0	0.714286	0	0	0	0	0	0	0	0	0	0	0
5000	0	0	0	0	0	0	0	0.78125	0	0	0	0	0	0	0	0	0	0	0	0	0	0	0	0

## Sheet: FIG5C
Type 2A Fiber CSA (um^2); SS TEN
	MALE
	WT								IKKmkd
W1	937.983	859.513	1166.68	545.986	832.874	737.948	893.209		612.433	895.027	845.457	838.095	926.783	567.729
W2	715.244	1202.34	1181.77	620.332	888.177	984.543			868.945	962.145		1235.93	635.563	1016.63	1116.3
W8	1011.61	1141.51	1078.9	1124.1		1336.9	1134.09		1330.25	1149.98	1194.05			1386.02	1621.41
	FEMALE
	WT								IKKmkd
W1	729.019	715.696	864.876	780.336	741.329	865.019	1057.47		719.28	711.736	1343.28	893.174	897.939	607.974	1120.11
W2	1048.78	1108.41	757.774	742.167	907.529		634.734		1116.95		994.134	699.689	860.411	932.943	990.253
W8	1447.93	1135.2	1086.97	1537.68	1038.27	1138.63			979.842	1468.74	1226.68	885.14	1017.59	1353.4	1080.79
Three-way ANOVA	Ordinary								Original FDR method of Benjamini and Hochberg	Q: 5%
Alpha	0.05										Discovery?	P value	q value
									M	W1	No	0.467899	0.625091
Source of Variation	% of total variation	P value	P value summary	Significant?						W2	No	0.760235	0.783722
Time	43.73	<0.0001	****	Yes						W8	No	0.0544453	0.159219
Sex	0.1666	0.6576	ns	No					F	W1	No	0.487084	0.625091
Genotype	0.5976	0.4022	ns	No						W2	No	0.507332	0.625091
Time x Sex	0.8921	0.5906	ns	No						W8	No	0.476922	0.625091
Time x Genotype	0.2745	0.8496	ns	No					M WT	W1-W2	No	0.520909	0.625091
Sex x Genotype	0.1444	0.6799	ns	No						W1-W8	Yes	0.00792516	0.043464
Time x Sex x Genotype	3.596	0.1261	ns	No						W2-W8	No	0.0833866	0.166773
									M KO	W1-W2	No	0.098441	0.177194
ANOVA table	SS (Type III)	DF	MS	F (DFn, DFd)	P value					W1-W8	Yes	0.00040221	0.00723978
Time	1881425	2	940712	F (2, 63) = 26.03	P<0.0001					W2-W8	No	0.0143827	0.0517775
Sex	7166	1	7166	F (1, 63) = 0.1983	P=0.6576				F WT	W1-W2	No	0.613564	0.69026
Genotype	25711	1	25711	F (1, 63) = 0.7114	P=0.4022					W1-W8	Yes	0.00102865	0.00925785
Time x Sex	38379	2	19190	F (2, 63) = 0.5310	P=0.5906					W2-W8	Yes	0.00965866	0.043464
Time x Genotype	11810	2	5905	F (2, 63) = 0.1634	P=0.8496				F KO	W1-W2	No	0.783722	0.783722
Sex x Genotype	6211	1	6211	F (1, 63) = 0.1719	P=0.6799					W1-W8	No	0.0754205	0.166773
Time x Sex x Genotype	154705	2	77352	F (2, 63) = 2.140	P=0.1261					W2-W8	No	0.0619184	0.159219
Residual	2276849	63	36140

## Sheet: FIG5D
Type 2B Fiber CSA (um^2); SS TEN
	MALE
	WT								IKKmkd
W1	2277	2529.51	2537.27	2325.49	2364.95	2438.61	2401.04		2104.2	2678.43	2383.49	2268.31	2352.94	1711.22
W2	1957.32	2100.73	2065.27	2508.03	1993	2086.13			2025.14	2014.46		2430.67	1962.24	2498.04	2512.82
W8	2109.38	1769.36	1847.65	2068.9		1854.62	2045.73		2022.53	2265.97	1961.2			1971.1	2317.91
	FEMALE
	WT								IKKmkd
W1	1763.79	1424.24	1861.41	2335.57	1941.54	2183.57	1821.68		1249.8	1451.15	2032.93	2003.41	1950.58	1560.39	2020.83
W2	1787.95	1721.57	1625.95	1684.75	1557.56		2029.05		1667	1710.2	2080.63	1894.93	1268.15	1559.64	2142.75
W8	1730.65	1924.33	2220.89	1608.52	2052.13	1964.67			1474.61	2365.34	1844.09	1478.38	1470.92	2057.83	1776.58
Three-way ANOVA	Ordinary								Original FDR method of Benjamini and Hochberg	Q: 5%
Alpha	0.05										Discovery?	P value	q value
									M	W1	No	0.235017	0.611518
Source of Variation	% of total variation	P value	P value summary	Significant?						W2	No	0.461587	0.69238
Time	43.73	<0.0001	****	Yes						W8	No	0.126583	0.487173
Sex	0.1666	0.6576	ns	No					F	W1	No	0.378468	0.69238
Genotype	0.5976	0.4022	ns	No						W2	No	0.855993	0.964119
Time x Sex	0.8921	0.5906	ns	No						W8	No	0.423173	0.69238
Time x Genotype	0.2745	0.8496	ns	No					M WT	W1-W2	Yes	0.00549797	0.0494817
Sex x Genotype	0.1444	0.6799	ns	No						W1-W8	Yes	2.6104e-05	0.000469872
Time x Sex x Genotype	3.596	0.1261	ns	No						W2-W8	No	0.09287	0.487173
									M KO	W1-W2	No	0.958097	0.964119
ANOVA table	SS (Type III)	DF	MS	F (DFn, DFd)	P value					W1-W8	No	0.402152	0.69238
Time	1881425	2	940712	F (2, 63) = 26.03	P<0.0001					W2-W8	No	0.361323	0.69238
Sex	7166	1	7166	F (1, 63) = 0.1983	P=0.6576				F WT	W1-W2	No	0.237812	0.611518
Genotype	25711	1	25711	F (1, 63) = 0.7114	P=0.4022					W1-W8	No	0.934665	0.964119
Time x Sex	38379	2	19190	F (2, 63) = 0.5310	P=0.5906					W2-W8	No	0.135326	0.487173
Time x Genotype	11810	2	5905	F (2, 63) = 0.1634	P=0.8496				F KO	W1-W2	No	0.964119	0.964119
Sex x Genotype	6211	1	6211	F (1, 63) = 0.1719	P=0.6799					W1-W8	No	0.87627	0.964119
Time x Sex x Genotype	154705	2	77352	F (2, 63) = 2.140	P=0.1261					W2-W8	No	0.907305	0.964119
Residual	2276849	63	36140

## Sheet: FIG5E
Total Fiber Number; SS TEN
	MALE
	WT								IKKmkd
W1	2074	2163			2432	2613	2667		2528	1755	2641	2288	2827	1931
W2	2072	2385	2658	1834	2053	2371			2594	1815	1834	1711	2091
W8	2874	2079	2354	3180	2321	2487	1729		2765	2170	2148	2185		2567	1900
	FEMALE
	WT								IKKmkd
W1	2353	2505	2236		2743	2377			2366	3131	2423	2409	2658	3236
W2	1927	1583	2497		2555	1924	2725		2049	2367	1953		2094	2941
W8	1777	1583	1934	2506		2134			2797	2039	1647	2012	2666	2391
Three-way ANOVA	Ordinary								Original FDR method of Benjamini and Hochberg	Q: 5%
Alpha	0.05										Discovery?	P value	q value
									M	W1	No	0.783232	0.91453
Source of Variation	% of total variation	P value	P value summary	Significant?						W2	No	0.291848	0.596866
Time	9.683	0.0377	*	Yes						W8	No	0.548824	0.75991
Sex	0.1774	0.7225	ns	No					F	W1	No	0.205219	0.596866
Genotype	0.1601	0.7358	ns	No						W2	No	0.768337	0.91453
Time x Sex	6.384	0.1104	ns	No						W8	No	0.293473	0.596866
Time x Genotype	0.862	0.7351	ns	No					M WT	W1-W2	No	0.371772	0.615465
Sex x Genotype	4.876	0.0665	ns	No						W1-W8	No	0.863723	0.91453
Time x Sex x Genotype	0.1048	0.9631	ns	No						W2-W8	No	0.390453	0.615465
									M KO	W1-W2	No	0.211067	0.596866
ANOVA table	SS (Type III)	DF	MS	F (DFn, DFd)	P value					W1-W8	No	0.858472	0.91453
Time	994686	2	497343	F (2, 56) = 3.477	P=0.0377					W2-W8	No	0.199755	0.596866
Sex	18221	1	18221	F (1, 56) = 0.1274	P=0.7225				F WT	W1-W2	No	0.298433	0.596866
Genotype	16447	1	16447	F (1, 56) = 0.1150	P=0.7358					W1-W8	No	0.0353126	0.596866
Time x Sex	655801	2	327901	F (2, 56) = 2.292	P=0.1104					W2-W8	No	0.41031	0.615465
Time x Genotype	88548	2	44274	F (2, 56) = 0.3095	P=0.7351				F KO	W1-W2	No	0.108853	0.596866
Sex x Genotype	500871	1	500871	F (1, 56) = 3.502	P=0.0665					W1-W8	No	0.0913397	0.596866
Time x Sex x Genotype	10764	2	5382	F (2, 56) = 0.03763	P=0.9631					W2-W8	No	0.932728	0.932728
Residual	8010491	56	143044

## Sheet: FIG5F
Predicted Fiber Length (mm); SS TEN
	MALE
	WT								IKKmkd
W2	4.7862	5.25974	5.73777	5.73777	5.73777		5.25974		5.73777	5.25974	5.73777	5.73777	5.73777
W8	4.7862	5.25974	5.25974	4.7862		5.73777	4.7862		4.7862	5.73777		4.7862	5.73777	5.73777
	FEMALE
	WT								IKKmkd
W2	3.90583	4.36686	5.7889		4.83564	4.83564	4.83564		4.83564	4.83564	4.36686	4.83564	4.83564
W8	4.36686	3.90583	4.83564	4.36686	4.83564	4.36686	4.36686		4.36686	4.36686	3.90583	4.83564	4.83564	4.36686
Three-way ANOVA	Ordinary								Šídák's multiple comparisons test	Mean Diff.	95.00% CI of diff.	Below threshold?	Summary	Adjusted P Value
Alpha	0.05
									W2:MALE WT vs. W8:MALE WT	0.3172	-0.3904 to 1.025	No	ns	0.9101
Source of Variation	% of total variation	P value	P value summary	Significant?					W2:MALE IKK vs. W8:MALE IKK	0.3164	-0.3912 to 1.024	No	ns	0.9115
Time	7.955	0.0107	*	Yes					W2:FEMALE WT vs. W8:FEMALE WT	0.3265	-0.3554 to 1.008	No	ns	0.8666
Sex	44.75	<0.0001	****	Yes					W2:FEMALE IKK vs. W8:FEMALE IKK	0.2956	-0.4465 to 1.038	No	ns	0.9595
Genotype	0.484	0.5124	ns	No					W2:MALE WT vs. W2:MALE IKK	-0.1586	-0.8662 to 0.5490	No	ns	0.9998
Time x Sex	0.0006733	0.9805	ns	No					W2:FEMALE WT vs. W2:FEMALE IKK	0.01953	-0.7226 to 0.7617	No	ns	>0.9999
Time x Genotype	0.005046	0.9465	ns	No					W8:MALE WT vs. W8:MALE IKK	-0.1593	-0.8669 to 0.5483	No	ns	0.9997
Sex x Genotype	0.5365	0.4905	ns	No					W8:FEMALE WT vs. W8:FEMALE IKK	-0.01135	-0.6932 to 0.6705	No	ns	>0.9999
Time x Sex x Genotype	0.00458	0.9491	ns	No					W2:MALE WT vs. W2:FEMALE WT	0.6584	-0.04919 to 1.366	No	ns	0.0857
									W2:MALE IKK vs. W2:FEMALE IKK	0.8365	0.09440 to 1.579	Yes	*	0.0175
ANOVA table	SS (Type III)	DF	MS	F (DFn, DFd)	P value				W8:MALE WT vs. W8:FEMALE WT	0.6677	-0.01416 to 1.350	No	ns	0.0589
Time	1.174	1	1.174	F (1, 40) = 7.180	P=0.0107				W8:MALE IKK vs. W8:FEMALE IKK	0.8157	0.1081 to 1.523	Yes	*	0.0141
Sex	6.606	1	6.606	F (1, 40) = 40.39	P<0.0001
Genotype	0.07145	1	0.07145	F (1, 40) = 0.4369	P=0.5124
Time x Sex	9.939e-05	1	9.939e-05	F (1, 40) = 0.0006077	P=0.9805
Time x Genotype	0.0007449	1	0.0007449	F (1, 40) = 0.004555	P=0.9465
Sex x Genotype	0.0792	1	0.0792	F (1, 40) = 0.4843	P=0.4905
Time x Sex x Genotype	0.0006761	1	0.0006761	F (1, 40) = 0.004134	P=0.9491
Residual	6.542	40	0.1635
