# Supplementary material for: Tenotomy-induced muscle atrophy is sex-specific and independent of NFκB
Source: eLife journal article supplement (doi:10.7554/elife.82016), 2022-12-12
Supplement: supp [file elife-82016-supp-v1.zip › elife_poa_e82016_Figure_6_source_data_1.xlsx]

## Sheet: FIG6B
Sirius Red (Area Fraction); W8
	MALE
	WT							IKKmkd
SHM	13.6883	14.721	15.7159	16.4613	14.3825			16.6652	17.1936	16.7872	15.8782
TEN	19.3173	18.1219	17.4913	18.3969	19.319			24.188	16.3856	17.8524	18.5008
	FEMALE
	WT							IKKmkd
SHM	16.438	16.8834	17.9161	18.6399				15.7562	16.0134	15.9743	15.2029
TEN	21.0733	16.1478	18.4586	18.6709				18.2087	18.4403	20.2029	18.6784	18.4374
Three-way ANOVA	Ordinary							Šídák's multiple comparisons test	Mean Diff.	95.00% CI of diff.	Below threshold?	Summary	Adjusted P Value
Alpha	0.05
								SHM:WT Male vs. TEN:WT Male	-3.535	-6.514 to -0.5570	Yes	*	0.0115
Source of Variation	% of total variation	P value	P value summary	Significant?				SHM:IKK Male vs. TEN:IKK Male	-2.601	-5.931 to 0.7293	No	ns	0.2312
Treatment	41.42	<0.0001	****	Yes				SHM:WT Female vs. TEN:WT Female	-1.118	-4.448 to 2.212	No	ns	0.9871
Sex	0.5624	0.5632	ns	No				SHM:IKK Female vs. TEN:IKK Female	-3.057	-6.216 to 0.1023	No	ns	0.0638
Genotype	0.2575	0.6952	ns	No				SHM:WT Male vs. SHM:IKK Male	-1.637	-4.796 to 1.522	No	ns	0.7767
Treatment x Sex	1.498	0.3479	ns	No				SHM:WT Female vs. SHM:IKK Female	1.733	-1.597 to 5.063	No	ns	0.7724
Treatment x Genotype	0.3925	0.6288	ns	No				TEN:WT Male vs. TEN:IKK Male	-0.7025	-3.862 to 2.457	No	ns	0.9997
Sex x Genotype	5.824	0.0704	ns	No				TEN:WT Female vs. TEN:IKK Female	-0.2059	-3.365 to 2.953	No	ns	>0.9999
Treatment x Sex x Genotype	3.217	0.1729	ns	No				SHM:WT Male vs. SHM:WT Female	-2.476	-5.635 to 0.6836	No	ns	0.2274
								SHM:IKK Male vs. SHM:IKK Female	0.8943	-2.436 to 4.224	No	ns	0.9982
ANOVA table	SS (Type III)	DF	MS	F (DFn, DFd)	P value			TEN:WT Male vs. TEN:WT Female	-0.05839	-3.218 to 3.101	No	ns	>0.9999
Treatment	57.47	1	57.47	F (1, 27) = 25.24	P<0.0001			TEN:IKK Male vs. TEN:IKK Female	0.4382	-2.721 to 3.597	No	ns	>0.9999
Sex	0.7802	1	0.7802	F (1, 27) = 0.3426	P=0.5632
Genotype	0.3572	1	0.3572	F (1, 27) = 0.1569	P=0.6952
Treatment x Sex	2.079	1	2.079	F (1, 27) = 0.9128	P=0.3479
Treatment x Genotype	0.5446	1	0.5446	F (1, 27) = 0.2391	P=0.6288
Sex x Genotype	8.081	1	8.081	F (1, 27) = 3.548	P=0.0704
Treatment x Sex x Genotype	4.463	1	4.463	F (1, 27) = 1.960	P=0.1729
Residual	61.49	27	2.277

## Sheet: FIG6D
Oil Red O (Area Fraction); W8
	MALE
	WT								IKKmkd
SHM	0.189	0.128	0.223	0.928	0.223	0.546	0.288		0.0452	0.04	0.275	0.229	0.478
TEN	1.191	1.655	0.464	0.836	0.576	0.7193	0.649		0.803	1.013	0.407	0.603	0.792	1.088
	FEMALE
	WT								IKKmkd
SHM	0.832	0.203	0.293	0.361	0.767	0.285			0.086	1.1	0.202	0.787	0.188	0.705
TEN	2.698	2.296	0.782	1.625	0.989				1.226	1.01	2.04	0.901	1.272	0.796
Three-way ANOVA	Ordinary								Šídák's multiple comparisons test	Mean Diff.	95.00% CI of diff.	Below threshold?	Summary	Adjusted P Value
Alpha	0.05
									SHM:WT Male vs. TEN:WT Male	-0.5093	-1.182 to 0.1630	No	ns	0.2799
Source of Variation	% of total variation	P value	P value summary	Significant?					SHM:IKK Male vs. TEN:IKK Male	-0.5709	-1.333 to 0.1907	No	ns	0.2936
Treatment	41.74	<0.0001	****	Yes					SHM:WT Female vs. TEN:WT Female	-1.221	-1.983 to -0.4596	Yes	***	0.0002
Sex	12.27	0.0017	**	Yes					SHM:IKK Female vs. TEN:IKK Female	-0.6962	-1.422 to 0.03000	No	ns	0.0691
Genotype	1.957	0.1863	ns	No					SHM:WT Male vs. SHM:IKK Male	0.1473	-0.5892 to 0.8837	No	ns	>0.9999
Treatment x Sex	3.256	0.0905	ns	No					SHM:WT Female vs. SHM:IKK Female	-0.0545	-0.7807 to 0.6717	No	ns	>0.9999
Treatment x Genotype	0.9978	0.3427	ns	No					TEN:WT Male vs. TEN:IKK Male	0.08571	-0.6140 to 0.7855	No	ns	>0.9999
Sex x Genotype	0.1556	0.7065	ns	No					TEN:WT Female vs. TEN:IKK Female	0.4705	-0.2911 to 1.232	No	ns	0.5732
Treatment x Sex x Genotype	1.598	0.2314	ns	No					SHM:WT Male vs. SHM:WT Female	-0.09612	-0.7959 to 0.6036	No	ns	>0.9999
									SHM:IKK Male vs. SHM:IKK Female	-0.2979	-1.060 to 0.4637	No	ns	0.9645
ANOVA table	SS (Type III)	DF	MS	F (DFn, DFd)	P value				TEN:WT Male vs. TEN:WT Female	-0.808	-1.544 to -0.07149	Yes	*	0.0226
Treatment	6.644	1	6.644	F (1, 40) = 38.58	P<0.0001				TEN:IKK Male vs. TEN:IKK Female	-0.4232	-1.149 to 0.3030	No	ns	0.6557
Sex	1.953	1	1.953	F (1, 40) = 11.34	P=0.0017
Genotype	0.3114	1	0.3114	F (1, 40) = 1.808	P=0.1863
Treatment x Sex	0.5182	1	0.5182	F (1, 40) = 3.008	P=0.0905
Treatment x Genotype	0.1588	1	0.1588	F (1, 40) = 0.9221	P=0.3427
Sex x Genotype	0.02477	1	0.02477	F (1, 40) = 0.1438	P=0.7065
Treatment x Sex x Genotype	0.2544	1	0.2544	F (1, 40) = 1.477	P=0.2314
Residual	6.889	40	0.1722

## Sheet: FIG6F
Central Nuclei (% Fibers); TEN
	MALE
	WT								IKKmkd
W1	0.530376	1.52566	0.719572	0.612323	0.674916				0.593354	0.626781	0.624763	0.437063	0.265299	0.880373
W2	1.73745	0.985325	0.714823	0.660161	0.736096	1.01223			1.29144	2.91454	0.841067	0.789012	0.613346	1.48387
W8	1.14823	1.8759	1.48683	4.74843	1.93882	5.3076			0.922242	0.852535	0.651769	3.20366	1.05181	1.52632
	FEMALE
	WT								IKKmkd
W1	0.467488	0.359281	0.33542	0.286862	0.532765				0.211327	0.23954	0.453983	0.705687	0.3386	0.139061
W2	0.544888	0.50537	0.841009	1.52642	0.597713	0.440367			2.85505	0.591466	1.30568	0.764088	0.459028
W8	2.87001	2.55843	0.41365	0.598563	0.468604				0.393279	1.37322	0.819672	0.646123	0.375094	0.334588
Three-way ANOVA	Ordinary								Original FDR method of Benjamini and Hochberg	Q: 5%
Alpha	0.05										Discovery?	P value	q value
									M	W1	No	0.231848	0.354437
Source of Variation	% of total variation	P value	P value summary	Significant?						W2	No	0.472984	0.567581
Time	17.5	0.0007	***	Yes						W8	No	0.126026	0.252051
Sex	6.617	0.0152	*	Yes					F	W1	No	0.646098	0.684104
Genotype	1.893	0.1858	ns	No						W2	No	0.327728	0.421364
Time x Sex	3.798	0.1747	ns	No						W8	No	0.201034	0.354437
Time x Genotype	9.157	0.0178	*	Yes					M WT	W1-W2	No	0.524095	0.589607
Sex x Genotype	0.696	0.4201	ns	No						W1-W8	No	0.0436748	0.252051
Time x Sex x Genotype	0.3555	0.8453	ns	No						W2-W8	No	0.0395923	0.252051
									M KO	W1-W2	No	0.0996555	0.252051
ANOVA table	SS (Type III)	DF	MS	F (DFn, DFd)	P value					W1-W8	No	0.0714426	0.252051
Time	11.33	2	5.664	F (2, 55) = 8.299	P=0.0007					W2-W8	No	0.894242	0.894242
Sex	4.283	1	4.283	F (1, 55) = 6.275	P=0.0152				F WT	W1-W2	No	0.099451	0.252051
Genotype	1.225	1	1.225	F (1, 55) = 1.795	P=0.1858					W1-W8	No	0.110299	0.252051
Time x Sex	2.458	2	1.229	F (2, 55) = 1.801	P=0.1747					W2-W8	No	0.255982	0.354437
Time x Genotype	5.926	2	2.963	F (2, 55) = 4.342	P=0.0178				F KO	W1-W2	No	0.0673355	0.252051
Sex x Genotype	0.4505	1	0.4505	F (1, 55) = 0.6600	P=0.4201					W1-W8	No	0.122437	0.252051
Time x Sex x Genotype	0.2301	2	0.1151	F (2, 55) = 0.1686	P=0.8453					W2-W8	No	0.247768	0.354437
Residual	37.54	55	0.6825

## Sheet: FIG6H
Basophilic Puncta (% Fibers); TEN
	MALE
	WT								IKKmkd
W1	0.048216	0.23116	0.205592	0.03827	0.112486				0.158228	0.22792	0.113593	0.176866	0.31072
W2	0.289575	0.293501	0.112867	0.287026	0.218103	0.126529			0.462606	0.509338	0.638051	0.049068
W8	4.31454	1.0582	2.46389	1.03774	2.8436	3.81986	3.23887		5.60579	2.35023	2.00186	3.84439	3.19439	3.52632
	FEMALE
	WT								IKKmkd
W1	0	0.07984	0.044723	0	0				0	0.063877	0	0.124533	0	0
W2	0	0	0.080096	0	0.051975	0			0.195217	0.042248	0.102407	0	0.034002
W8	0.337648	0.252685	0.155119	0.079808	0.187441				0.107258	0.392349	0.242866	0.099404	0.075019	0.125471
Three-way ANOVA	Ordinary								Original FDR method of Benjamini and Hochberg	Q: 5%
Alpha	0.05										Discovery?	P value	q value
									M	W1	No	0.213214	0.295219
Source of Variation	% of total variation	P value	P value summary	Significant?						W2	No	0.114892	0.206805
Time	30.8	<0.0001	****	Yes						W8	No	0.320126	0.384151
Sex	17.86	<0.0001	****	Yes					F	W1	No	0.820538	0.868805
Genotype	0.4458	0.2399	ns	No						W2	No	0.164197	0.246296
Time x Sex	24.86	<0.0001	****	Yes						W8	No	0.680933	0.766049
Time x Genotype	0.2808	0.6433	ns	No					M WT	W1-W2	No	0.103481	0.206805
Sex x Genotype	0.3948	0.2684	ns	No						W1-W8	Yes	0.00127936	0.00767616
Time x Sex x Genotype	0.3908	0.5423	ns	No						W2-W8	Yes	0.00064364	0.00579276
									M KO	W1-W2	No	0.108763	0.206805
ANOVA table	SS (Type III)	DF	MS	F (DFn, DFd)	P value					W1-W8	Yes	0.00034434	0.00579276
Time	33.08	2	16.54	F (2, 54) = 48.79	P<0.0001					W2-W8	Yes	0.00186875	0.00783914
Sex	19.18	1	19.18	F (1, 54) = 56.58	P<0.0001				F WT	W1-W2	No	0.896256	0.896256
Genotype	0.4787	1	0.4787	F (1, 54) = 1.412	P=0.2399					W1-W8	Yes	0.00519773	0.0155932
Time x Sex	26.7	2	13.35	F (2, 54) = 39.38	P<0.0001					W2-W8	Yes	0.00217754	0.00783914
Time x Genotype	0.3016	2	0.1508	F (2, 54) = 0.4448	P=0.6433				F KO	W1-W2	No	0.29442	0.37854
Sex x Genotype	0.4239	1	0.4239	F (1, 54) = 1.251	P=0.2684					W1-W8	No	0.0254241	0.0653761
Time x Sex x Genotype	0.4196	2	0.2098	F (2, 54) = 0.6190	P=0.5423					W2-W8	No	0.1521	0.246296
Residual	18.31	54	0.339

## Sheet: FIG6I
FAPs (PDGFRa+ cells/fiber)
	MALE
	WT								IKKmkd
SHM	1.19355	1.14807	1.34626	1.15877					1.10452	0.940322	0.716707	1.11228
TEN	1.71629	1.55555	1.68839						1.45095	1.35969	1.78704	1.71582
	FEMALE
	WT								IKKmkd
SHM	1.29037	0.893775	1.26041	1.21296					1.11935	0.992998	0.966632	1.04173
TEN	1.45095	1.35969	1.78704	1.73765					1.50358	1.42667	1.45594	1.18617
Three-way ANOVA	Ordinary								Šídák's multiple comparisons test	Mean Diff.	95.00% CI of diff.	Below threshold?	Summary	Adjusted P Value
Alpha	0.05
									SHM:WT Male vs. TEN:WT Male	-0.4417	-0.8253 to -0.05815	Yes	*	0.0159
Source of Variation	% of total variation	P value	P value summary	Significant?					SHM:IKK Male vs. TEN:IKK Male	-0.6099	-0.9651 to -0.2548	Yes	***	0.0002
Treatment	65.91	<0.0001	****	Yes					SHM:WT Female vs. TEN:WT Female	-0.4195	-0.7746 to -0.06432	Yes	*	0.0126
Sex	1.133	0.3039	ns	No					SHM:IKK Female vs. TEN:IKK Female	-0.3629	-0.7181 to -0.007773	Yes	*	0.0425
Genotype	8.106	0.0099	**	Yes					SHM:WT Male vs. SHM:IKK Male	0.2432	-0.1119 to 0.5983	No	ns	0.3908
Treatment x Sex	1.421	0.2509	ns	No					SHM:WT Female vs. SHM:IKK Female	0.1342	-0.2209 to 0.4893	No	ns	0.9646
Treatment x Genotype	0.2442	0.63	ns	No					TEN:WT Male vs. TEN:IKK Male	0.07503	-0.3086 to 0.4586	No	ns	>0.9999
Sex x Genotype	0.0008811	0.9769	ns	No					TEN:WT Female vs. TEN:IKK Female	0.1907	-0.1644 to 0.5459	No	ns	0.7251
Treatment x Sex x Genotype	0.9895	0.3359	ns	No					SHM:WT Male vs. SHM:WT Female	0.04729	-0.3079 to 0.4024	No	ns	>0.9999
									SHM:IKK Male vs. SHM:IKK Female	-0.06172	-0.4169 to 0.2934	No	ns	>0.9999
ANOVA table	SS (Type III)	DF	MS	F (DFn, DFd)	P value				TEN:WT Male vs. TEN:WT Female	0.06958	-0.3140 to 0.4532	No	ns	>0.9999
Treatment	1.615	1	1.615	F (1, 23) = 64.35	P<0.0001				TEN:IKK Male vs. TEN:IKK Female	0.1853	-0.1699 to 0.5404	No	ns	0.7584
Sex	0.02775	1	0.02775	F (1, 23) = 1.106	P=0.3039
Genotype	0.1986	1	0.1986	F (1, 23) = 7.915	P=0.0099
Treatment x Sex	0.03481	1	0.03481	F (1, 23) = 1.387	P=0.2509
Treatment x Genotype	0.005981	1	0.005981	F (1, 23) = 0.2384	P=0.6300
Sex x Genotype	2.158e-05	1	2.158e-05	F (1, 23) = 0.0008603	P=0.9769
Treatment x Sex x Genotype	0.02424	1	0.02424	F (1, 23) = 0.9661	P=0.3359
Residual	0.577	23	0.02509

## Sheet: FIG6J
SCs (Pax7+ cells/fiber)
	MALE
	WT								IKKmkd
SHM	0.032121	0.0349355	0.0308867	0.0293021					0.0494298	0.0199962	0.0447078	0.0376727
TEN	0.0386471	0.0355434	0.0327714						0.0314341	0.0403067	0.043306	0.0323665	0.0376025
	FEMALE
	WT								IKKmkd
SHM	0.0276257	0.0371287	0.0210843	0.0333333					0.0321533	0.0263407	0.0311079	0.0256592
TEN	0.0292857	0.0248619	0.0421475	0.024911					0.0371651	0.0354223	0.0218638	0.0385578
Three-way ANOVA	Ordinary								Šídák's multiple comparisons test	Mean Diff.	95.00% CI of diff.	Below threshold?	Summary	Adjusted P Value
Alpha	0.05
									SHM:WT Male vs. TEN:WT Male	-0.003843	-0.02085 to 0.01317	No	ns	0.9996
Source of Variation	% of total variation	P value	P value summary	Significant?					SHM:IKK Male vs. TEN:IKK Male	0.0009484	-0.01399 to 0.01589	No	ns	>0.9999
Treatment	1.963	0.4435	ns	No					SHM:WT Female vs. TEN:WT Female	-0.0005085	-0.01626 to 0.01524	No	ns	>0.9999
Sex	13.11	0.0554	ns	No					SHM:IKK Female vs. TEN:IKK Female	-0.004437	-0.02019 to 0.01131	No	ns	0.9969
Genotype	2.859	0.3563	ns	No					SHM:WT Male vs. SHM:IKK Male	-0.00614	-0.02189 to 0.009609	No	ns	0.9568
Treatment x Sex	0.1344	0.8402	ns	No					SHM:WT Female vs. SHM:IKK Female	0.0009777	-0.01477 to 0.01673	No	ns	>0.9999
Treatment x Genotype	0.02376	0.9324	ns	No					TEN:WT Male vs. TEN:IKK Male	-0.001349	-0.01762 to 0.01492	No	ns	>0.9999
Sex x Genotype	0.9718	0.5886	ns	No					TEN:WT Female vs. TEN:IKK Female	-0.002951	-0.01870 to 0.01280	No	ns	>0.9999
Treatment x Sex x Genotype	2.428	0.3947	ns	No					SHM:WT Male vs. SHM:WT Female	0.002018	-0.01373 to 0.01777	No	ns	>0.9999
									SHM:IKK Male vs. SHM:IKK Female	0.009136	-0.006613 to 0.02489	No	ns	0.63
ANOVA table	SS (Type III)	DF	MS	F (DFn, DFd)	P value				TEN:WT Male vs. TEN:WT Female	0.005352	-0.01166 to 0.02236	No	ns	0.9919
Treatment	3.023e-05	1	3.023e-05	F (1, 24) = 0.6071	P=0.4435				TEN:IKK Male vs. TEN:IKK Female	0.003751	-0.01119 to 0.01869	No	ns	0.999
Sex	0.0002018	1	0.0002018	F (1, 24) = 4.054	P=0.0554
Genotype	4.404e-05	1	4.404e-05	F (1, 24) = 0.8845	P=0.3563
Treatment x Sex	2.069e-06	1	2.069e-06	F (1, 24) = 0.04156	P=0.8402
Treatment x Genotype	3.66e-07	1	3.66e-07	F (1, 24) = 0.007350	P=0.9324
Sex x Genotype	1.497e-05	1	1.497e-05	F (1, 24) = 0.3006	P=0.5886
Treatment x Sex x Genotype	3.739e-05	1	3.739e-05	F (1, 24) = 0.7510	P=0.3947
Residual	0.001195	24	4.979e-05
