# Supplementary material for: Tenotomy-induced muscle atrophy is sex-specific and independent of NFκB
Source: eLife journal article supplement (doi:10.7554/elife.82016), 2022-12-12
Supplement: supp [file elife-82016-supp-v1.zip › elife_poa_e82016_Figure_7_figure_supplement_1_source_data_1.xlsx]

## Sheet: FIG7S1A
pAkt/Akt; W1																	pS6/S6; W1																pmTOR/mTOR; W1
	MALE																	MALE																MALE
	WT								IKKmkd									WT								IKKmkd								WT								IKKmkd
SHM	0.173684	0.340909	0.265101	0.223404					0.510791	0.447326	0.292	0.243784					SHM	1.17089	0.825503	1.22754	0.927273					0.647059	4	1.67839	0.809524				SHM	0.224138	0.140441	0.115652	0.250441					0.302326	0.182667	0.17975	0.149758
TEN	0.167568	0.146684	0.423837	0.249171	0.463376	0.349515	0.616822		0.234076	0.163205	0.169248	0.140441	0.313333	0.391509			TEN	0.769886	0.234237	4.80822	1.5871	1.55378	1.15385			1.22936	0.221176	1.12211	0.72314	3.76119	1.89831		TEN	0.0870321	0.142411	0.145833	0.162946	0.221774	0.261261	0.23871		0.172964	0.148009	0.147838	0.188612	0.145513	0.454039
	FEMALE																	FEMALE																FEMALE
	WT								IKKmkd									WT								IKKmkd								WT								IKKmkd
SHM	0.149015	0.273203	0.336585						0.132263	0.409767	0.5	0.561765	0.143448				SHM	1.24419	0.535922	0.849123						0.993757	1.97854	1.18797	7.58537	2.0954			SHM	0.343499	0.147571	0.159265							0.192446	0.237129	0.252404	0.324138	0.555324
TEN	0.155093	0.18	0.253403	0.341216	0.237327	0.370621	0.365591	0.239938	0.166197	0.257209	0.217325	0.295082	0.337748	0.142857			TEN	0.578	0.182231	0.516993	0.104545	3.9823				0.638393	0.276349	0.401802	0.374839	1.4434	3.53488		TEN	0.280233	0.269859	0.166081	0.224971	0.188073	0.248038	0.314035		0.236181	0.278274	0.174099	0.231308	0.267754	0.195181	0.296632
Three-way ANOVA	Ordinary								Šídák's multiple comparisons test	Mean Diff.	95.00% CI of diff.	Below threshold?	Summary	Adjusted P Value			Three-way ANOVA	Ordinary								Šídák's multiple comparisons test	Mean Diff.	95.00% CI of diff.	Below threshold?	Summary	Adjusted P Value		Three-way ANOVA	Ordinary								Šídák's multiple comparisons test	Mean Diff.	95.00% CI of diff.	Below threshold?	Summary	Adjusted P Value
Alpha	0.05																Alpha	0.05															Alpha	0.05
									SHM:WT Male vs. TEN:WT Male	0.02396	-0.2105 to 0.2584	No	ns	>0.9999												SHM:WT Male vs. TEN:WT Male	-0.6467	-3.988 to 2.695	No	ns	>0.9999											SHM:WT Male vs. TEN:WT Male	0.002673	-0.1363 to 0.1417	No	ns	>0.9999
Source of Variation	% of total variation	P value	P value summary	Significant?					SHM:IKK Male vs. TEN:IKK Male	0.1382	-0.1118 to 0.3881	No	ns	0.7172			Source of Variation	% of total variation	P value	P value summary	Significant?					SHM:IKK Male vs. TEN:IKK Male	0.2912	-3.050 to 3.633	No	ns	>0.9999		Source of Variation	% of total variation	P value	P value summary	Significant?					SHM:IKK Male vs. TEN:IKK Male	-0.005871	-0.1490 to 0.1373	No	ns	>0.9999
Treatment	6.22	0.1193	ns	No					SHM:WT Female vs. TEN:WT Female	-0.01896	-0.2861 to 0.2482	No	ns	>0.9999			Treatment	0.9589	0.5592	ns	No					SHM:WT Female vs. TEN:WT Female	-0.1964	-3.977 to 3.584	No	ns	>0.9999		Treatment	0.07048	0.8666	ns	No					SHM:WT Female vs. TEN:WT Female	-0.02483	-0.1779 to 0.1282	No	ns	>0.9999
Sex	1.41	0.4522	ns	No					SHM:IKK Female vs. TEN:IKK Female	0.1128	-0.1139 to 0.3395	No	ns	0.8297			Sex	0.0005218	0.9891	ns	No					SHM:IKK Female vs. TEN:IKK Female	1.857	-1.278 to 4.991	No	ns	0.6195		Sex	8.779	0.0673	ns	No					SHM:IKK Female vs. TEN:IKK Female	0.01237	-0.1175 to 0.1422	No	ns	>0.9999
Genotype	0.2009	0.7758	ns	No					SHM:WT Male vs. SHM:IKK Male	-0.04949	-0.3092 to 0.2102	No	ns	>0.9999			Genotype	4.06	0.2336	ns	No					SHM:WT Male vs. SHM:IKK Male	-0.7459	-4.406 to 2.914	No	ns	0.9999		Genotype	2.04	0.369	ns	No					SHM:WT Male vs. SHM:IKK Male	-0.02096	-0.1778 to 0.1359	No	ns	>0.9999
Treatment x Sex	0.4423	0.6729	ns	No					SHM:WT Female vs. SHM:IKK Female	-0.09651	-0.3793 to 0.1862	No	ns	0.9871			Treatment x Sex	2.289	0.3687	ns	No					SHM:WT Female vs. SHM:IKK Female	-2.092	-5.872 to 1.689	No	ns	0.7095		Treatment x Sex	0.02467	0.9209	ns	No					SHM:WT Female vs. SHM:IKK Female	-0.03551	-0.1975 to 0.1265	No	ns	0.9998
Treatment x Genotype	5.743	0.1339	ns	No					TEN:WT Male vs. TEN:IKK Male	0.06472	-0.1588 to 0.2883	No	ns	0.9969			Treatment x Genotype	5.039	0.1857	ns	No					TEN:WT Male vs. TEN:IKK Male	0.192	-2.797 to 3.181	No	ns	>0.9999		Treatment x Genotype	0.236	0.7587	ns	No					TEN:WT Male vs. TEN:IKK Male	-0.0295	-0.1529 to 0.09389	No	ns	0.9995
Sex x Genotype	0.555	0.6363	ns	No					TEN:WT Female vs. TEN:IKK Female	0.03527	-0.1717 to 0.2422	No	ns	>0.9999			Sex x Genotype	1.4	0.4809	ns	No					TEN:WT Female vs. TEN:IKK Female	-0.0388	-3.173 to 3.096	No	ns	>0.9999		Sex x Genotype	0.07957	0.8584	ns	No					TEN:WT Female vs. TEN:IKK Female	0.001694	-0.1169 to 0.1202	No	ns	>0.9999
Treatment x Sex x Genotype	0.0293	0.9134	ns	No					SHM:WT Male vs. SHM:WT Female	0.07105	-0.2117 to 0.3538	No	ns	0.9992			Treatment x Sex x Genotype	0.7004	0.6174	ns	No					SHM:WT Male vs. SHM:WT Female	0.1614	-3.792 to 4.115	No	ns	>0.9999		Treatment x Sex x Genotype	0.6012	0.6243	ns	No					SHM:WT Male vs. SHM:WT Female	-0.03411	-0.2035 to 0.1353	No	ns	>0.9999
									SHM:IKK Male vs. SHM:IKK Female	0.02403	-0.2357 to 0.2838	No	ns	>0.9999												SHM:IKK Male vs. SHM:IKK Female	-1.184	-4.657 to 2.288	No	ns	0.9864											SHM:IKK Male vs. SHM:IKK Female	-0.04866	-0.1974 to 0.1001	No	ns	0.9909
ANOVA table	SS (Type III)	DF	MS	F (DFn, DFd)	P value				TEN:WT Male vs. TEN:WT Female	0.02813	-0.1873 to 0.2435	No	ns	>0.9999			ANOVA table	SS (Type III)	DF	MS	F (DFn, DFd)	P value				TEN:WT Male vs. TEN:WT Female	0.6117	-2.523 to 3.746	No	ns	>0.9999		ANOVA table	SS (Type III)	DF	MS	F (DFn, DFd)	P value				TEN:WT Male vs. TEN:WT Female	-0.06162	-0.1802 to 0.05693	No	ns	0.7875
Treatment	0.0409	1	0.0409	F (1, 35) = 2.549	P=0.1193				TEN:IKK Male vs. TEN:IKK Female	-0.00132	-0.2167 to 0.2141	No	ns	>0.9999			Treatment	0.982	1	0.982	F (1, 31) = 0.3486	P=0.5592				TEN:IKK Male vs. TEN:IKK Female	0.3809	-2.608 to 3.370	No	ns	>0.9999		Treatment	0.0001506	1	0.0001506	F (1, 35) = 0.02862	P=0.8666				TEN:IKK Male vs. TEN:IKK Female	-0.03042	-0.1538 to 0.09297	No	ns	0.9993
Sex	0.009272	1	0.009272	F (1, 35) = 0.5779	P=0.4522												Sex	0.0005345	1	0.0005345	F (1, 31) = 0.0001897	P=0.9891											Sex	0.01876	1	0.01876	F (1, 35) = 3.565	P=0.0673
Genotype	0.001321	1	0.001321	F (1, 35) = 0.08236	P=0.7758												Genotype	4.158	1	4.158	F (1, 31) = 1.476	P=0.2336											Genotype	0.004361	1	0.004361	F (1, 35) = 0.8284	P=0.3690
Treatment x Sex	0.002908	1	0.002908	F (1, 35) = 0.1813	P=0.6729												Treatment x Sex	2.344	1	2.344	F (1, 31) = 0.8322	P=0.3687											Treatment x Sex	5.273e-05	1	5.273e-05	F (1, 35) = 0.01002	P=0.9209
Treatment x Genotype	0.03777	1	0.03777	F (1, 35) = 2.354	P=0.1339												Treatment x Genotype	5.161	1	5.161	F (1, 31) = 1.832	P=0.1857											Treatment x Genotype	0.0005044	1	0.0005044	F (1, 35) = 0.09582	P=0.7587
Sex x Genotype	0.00365	1	0.00365	F (1, 35) = 0.2275	P=0.6363												Sex x Genotype	1.434	1	1.434	F (1, 31) = 0.5091	P=0.4809											Sex x Genotype	0.0001701	1	0.0001701	F (1, 35) = 0.03231	P=0.8584
Treatment x Sex x Genotype	0.0001927	1	0.0001927	F (1, 35) = 0.01201	P=0.9134												Treatment x Sex x Genotype	0.7174	1	0.7174	F (1, 31) = 0.2547	P=0.6174											Treatment x Sex x Genotype	0.001285	1	0.001285	F (1, 35) = 0.2441	P=0.6243
Residual	0.5615	35	0.01604														Residual	87.32	31	2.817													Residual	0.1842	35	0.005264

## Sheet: FIG7S1B
pAkt/Akt								pmTOR/mTOR
	CTL	INS	CHX	CTL	ECC	CTL			CTL	INS	CHX	CTL	ECC	CTL
	0.0418848	0.339823	0.0447826	0.0692523	0.122517	0.0966749			0.283041	0.513393	0.261486	0.257669	0.622901	0.223841

## Sheet: FIG7S1C
Mstn/GAPDH; W1																	Mstn/GAPDH; W8																	Mstn/GAPDH
	MALE																	MALE
	WT								IKKmkd									WT								IKKmkd								CTL	ECC	SHM	MORB
SHM	1.30562	0.925112	0.97575	0.793517					0.738163	0.680726	0.908702	1.45111					SHM	0.795589		0.380658	1.3827	0.60731	0.598307	2.03102	0.195897	1.22783	1.66972		0.948784					1	1.5597	0.79347	3.72333
TEN	1.66808	1.09883	0.711001	1.31696	1.97096	1.33148			1.41544		0.509166	0.425015	0.608634	2.80263			TEN	0.594903		0.932934	1.77182	0.806327	1.83858		0.594903		1.89131	1.43332	0.790116	0.443499	1.33966					0.867783
	FEMALE																	FEMALE
	WT								IKKmkd									WT								IKKmkd
SHM	0.612398	0.728893	0.602152	1.67051					0.545723	0.585206	0.386457	0.374654		2.05566			SHM	1.50707	1.03645		0.658228	0.436516			1.78669	1.11341		0.917025	0.700253
TEN	0.987456	1.12468	0.405347		1.01749	1.36269	1.60547		0.924262	0.888947		1.19631	1.45055	0.647346			TEN	1.66858		0.947017	0.74761	0.843062	0.520876	0.750242	1.00021		1.48681	0.788449	0.870308
Three-way ANOVA	Ordinary								Šídák's multiple comparisons test	Mean Diff.	95.00% CI of diff.	Below threshold?	Summary	Adjusted P Value			Three-way ANOVA	Ordinary								Šídák's multiple comparisons test	Mean Diff.	95.00% CI of diff.	Below threshold?	Summary	Adjusted P Value
Alpha	0.05																Alpha	0.05
									SHM:WT Male vs. TEN:WT Male	-0.3496	-1.454 to 0.7551	No	ns	0.9927												SHM:WT Male vs. TEN:WT Male	-0.234	-1.110 to 0.6416	No	ns	0.9984
Source of Variation	% of total variation	P value	P value summary	Significant?					SHM:IKK Male vs. TEN:IKK Male	-0.2075	-1.356 to 0.9405	No	ns	>0.9999			Source of Variation	% of total variation	P value	P value summary	Significant?					SHM:IKK Male vs. TEN:IKK Male	0.1025	-1.047 to 1.252	No	ns	>0.9999
Treatment	5.254	0.1879	ns	No					SHM:WT Female vs. TEN:WT Female	-0.1804	-1.285 to 0.9243	No	ns	>0.9999			Treatment	0.07489	0.875	ns	No					SHM:WT Female vs. TEN:WT Female	0.1596	-0.7619 to 1.081	No	ns	>0.9999
Sex	2.348	0.3749	ns	No					SHM:IKK Female vs. TEN:IKK Female	-0.2319	-1.314 to 0.8504	No	ns	0.9998			Sex	1.187	0.5324	ns	No					SHM:IKK Female vs. TEN:IKK Female	-0.1383	-1.423 to 1.147	No	ns	>0.9999
Genotype	1.029	0.5555	ns	No					SHM:WT Male vs. SHM:IKK Male	0.05533	-1.155 to 1.265	No	ns	>0.9999			Genotype	1.331	0.5087	ns	No					SHM:WT Male vs. SHM:IKK Male	-0.4262	-1.512 to 0.6598	No	ns	0.96
Treatment x Sex	0.1172	0.842	ns	No					SHM:WT Female vs. SHM:IKK Female	0.1139	-1.034 to 1.262	No	ns	>0.9999			Treatment x Sex	0.1442	0.8273	ns	No					SHM:WT Female vs. SHM:IKK Female	0.1748	-0.9745 to 1.324	No	ns	>0.9999
Treatment x Genotype	0.04577	0.9008	ns	No					TEN:WT Male vs. TEN:IKK Male	0.1974	-0.8389 to 1.234	No	ns	>0.9999			Treatment x Genotype	0.009203	0.956	ns	No					TEN:WT Male vs. TEN:IKK Male	-0.08967	-1.043 to 0.8633	No	ns	>0.9999
Sex x Genotype	0.03262	0.9162	ns	No					TEN:WT Female vs. TEN:IKK Female	0.06237	-0.9739 to 1.099	No	ns	>0.9999			Sex x Genotype	1.989	0.4201	ns	No					TEN:WT Female vs. TEN:IKK Female	-0.1232	-1.209 to 0.9628	No	ns	>0.9999
Treatment x Sex x Genotype	0.2096	0.7897	ns	No					SHM:WT Male vs. SHM:WT Female	0.09651	-1.114 to 1.307	No	ns	>0.9999			Treatment x Sex x Genotype	2.486	0.368	ns	No					SHM:WT Male vs. SHM:WT Female	-0.2291	-1.151 to 0.6924	No	ns	0.9992
									SHM:IKK Male vs. SHM:IKK Female	0.1551	-0.9929 to 1.303	No	ns	>0.9999												SHM:IKK Male vs. SHM:IKK Female	0.3719	-0.9131 to 1.657	No	ns	0.9967
ANOVA table	SS (Type III)	DF	MS	F (DFn, DFd)	P value				TEN:WT Male vs. TEN:WT Female	0.2657	-0.7223 to 1.254	No	ns	0.9983			ANOVA table	SS (Type III)	DF	MS	F (DFn, DFd)	P value				TEN:WT Male vs. TEN:WT Female	0.1645	-0.7110 to 1.040	No	ns	>0.9999
Treatment	0.5582	1	0.5582	F (1, 31) = 1.813	P=0.1879				TEN:IKK Male vs. TEN:IKK Female	0.1307	-0.9517 to 1.213	No	ns	>0.9999			Treatment	0.006547	1	0.006547	F (1, 31) = 0.02515	P=0.8750				TEN:IKK Male vs. TEN:IKK Female	0.1311	-1.018 to 1.280	No	ns	>0.9999
Sex	0.2495	1	0.2495	F (1, 31) = 0.8104	P=0.3749												Sex	0.1038	1	0.1038	F (1, 31) = 0.3986	P=0.5324
Genotype	0.1093	1	0.1093	F (1, 31) = 0.3552	P=0.5555												Genotype	0.1163	1	0.1163	F (1, 31) = 0.4469	P=0.5087
Treatment x Sex	0.01245	1	0.01245	F (1, 31) = 0.04043	P=0.8420												Treatment x Sex	0.0126	1	0.0126	F (1, 31) = 0.04841	P=0.8273
Treatment x Genotype	0.004863	1	0.004863	F (1, 31) = 0.01580	P=0.9008												Treatment x Genotype	0.0008045	1	0.0008045	F (1, 31) = 0.003090	P=0.9560
Sex x Genotype	0.003466	1	0.003466	F (1, 31) = 0.01126	P=0.9162												Sex x Genotype	0.1738	1	0.1738	F (1, 31) = 0.6678	P=0.4201
Treatment x Sex x Genotype	0.02227	1	0.02227	F (1, 31) = 0.07235	P=0.7897												Treatment x Sex x Genotype	0.2173	1	0.2173	F (1, 31) = 0.8347	P=0.3680
Residual	9.543	31	0.3078														Residual	8.07	31	0.2603
