# Supplementary material for: Tenotomy-induced muscle atrophy is sex-specific and independent of NFκB
Source: eLife journal article supplement (doi:10.7554/elife.82016), 2022-12-12
Supplement: supp [file elife-82016-supp-v1.zip › elife_poa_e82016_Figure_7_figure_supplement_source_data_1.xlsx]

## Sheet: Fig 7S2A
Murf1 (TRIM63)/GAPDH							MAFbx (FBXO32)/GAPDH
	CTL	ECC	SHM	MORB				CTL	ECC	SHM	MORB
	1.18754	2.4535	0.981934	2.97738				0.410139	0.416437	0.803729	3.91388
			1.01807							1.19627

## Sheet: Fig 7S2B
Ubiquitin/Ponceau
	INS	MORB	ECC	CTL
	1.4078	2.25	0.907738	1.27217

## Sheet: Fig 7S2C
LC3II/LC3I
	SAL	INS	MORB	AGED	ECC	CTL
	3.84155	1.7479	8.54701	7.23502	7.54513	3.64103
