# Supplementary material for: Tenotomy-induced muscle atrophy is sex-specific and independent of NFκB
Source: eLife journal article supplement (doi:10.7554/elife.82016), 2022-12-12
Supplement: supp [file elife-82016-supp-v1.zip › elife_poa_e82016_Figure_7_source_data_1.xlsx]

## Sheet: FIG7A
Relative Trim63 (MuRF1) Expression																	Relative Fbxo32 (MAFbx) Expression																	Relative Foxo3 Expression
	MALE																	MALE																	MALE
	WT								IKKmkd									WT								IKKmkd									WT								IKKmkd
W1	1.32712	1.11006	1.19642	0.9177	0.855981	1.02308	0.952168		2.16966	1.46086	0.706949	1.10875	1.84144	1.47467			W1	1.46015	1.35193	1.85285	0.943768	0.758755	0.896387	0.520623		2.79943	2.02402	0.790224	0.758917	1.13157	1.85386			W1	1.81406	1.50509	2.2431	1.41186	1.48413	1.53781			2.79533	1.46404	1.28602	1.28945		1.07336
W8	0.924054	1.34296	0.979323	0.994513	2.0768	2.53545			1.2566	1.83769	1.23442	1.10644	0.699795	0.489545			W8	0.444481	0.5716	0.837081	0.75098	0.978853	0.446821			0.723203	0.94575	0.660348	0.469991	0.638948	0.145288			W8	0.629887	0.559194	1.15733	1.2237	1.32743	0.815283			1.01646	1.05746	1.49557	1.06753	1.18674	1.7486
	FEMALE																	FEMALE																	FEMALE
	WT								IKKmkd									WT								IKKmkd									WT								IKKmkd
W1	0.932531	0.739751	1.04612	0.948823	1.55582	1.39181	1.54687		1.07128	1.40943	0.840074	0.832339	1.65134	2.16114	0.968117		W1	0.99106	0.992685	1.49219	1.32536	1.40165	2.48855	1.78598		1.05792	1.16835	1.37378	1.69711	1.21797	2.42392	2.0317		W1	2.67255	2.90099	2.10671			2.28684			3.58976	3.07707	2.25702	3.44302	2.94498
W8	0.874972		0.291122	0.466565	0.352753	0.373099	0.471602		0.708075	0.277512	0.629049	0.415043	0.733213	0.304477	0.39015		W8			0.19547	0.241301	0.208613	0.228495	0.25909		0.264131	0.140824	0.363798	0.138091	0.355514	0.24354	0.282374		W8	0.745172		0.697669	1.54922	2.796	0.872469	1.39752		0.685987	0.792574	1.78232	1.48648	1.54779	2.05512	0.894705
Three-way ANOVA	Ordinary								Šídák's multiple comparisons test	Mean Diff.	95.00% CI of diff.	Below threshold?	Summary	Adjusted P Value			Three-way ANOVA	Ordinary								Šídák's multiple comparisons test	Mean Diff.	95.00% CI of diff.	Below threshold?	Summary	Adjusted P Value			Three-way ANOVA	Ordinary								Šídák's multiple comparisons test	Mean Diff.	95.00% CI of diff.	Below threshold?	Summary	Adjusted P Value
Alpha	0.05																Alpha	0.05																Alpha	0.05
									W1:WT M vs. W8:WT M	-0.4209	-1.111 to 0.2697	No	ns	0.5972												W1:WT M vs. W8:WT M	0.4404	-0.2994 to 1.180	No	ns	0.6295												W1:WT M vs. W8:WT M	0.7139	-0.1867 to 1.614	No	ns	0.2233
Source of Variation	% of total variation	P value	P value summary	Significant?					W1:KO M vs. W8:KO M	0.3563	-0.3604 to 1.073	No	ns	0.8389			Source of Variation	% of total variation	P value	P value summary	Significant?					W1:KO M vs. W8:KO M	0.9624	0.1947 to 1.730	Yes	**	0.0057			Source of Variation	% of total variation	P value	P value summary	Significant?					W1:KO M vs. W8:KO M	0.3196	-0.6250 to 1.264	No	ns	0.9883
Time	11.34	0.0035	**	Yes					W1:WT F vs. W8:WT F	0.6943	0.003677 to 1.385	Yes	*	0.0479			Time	54.97	<0.0001	****	Yes					W1:WT F vs. W8:WT F	1.27	0.4915 to 2.049	Yes	***	0.0002			Time	38.11	<0.0001	****	Yes					W1:WT F vs. W8:WT F	1.149	0.1419 to 2.156	Yes	*	0.0157
Sex	16.19	0.0006	***	Yes					W1:KO F vs. W8:KO F	0.7823	0.1188 to 1.446	Yes	*	0.011			Sex	0.5389	0.4315	ns	No					W1:KO F vs. W8:KO F	1.312	0.6010 to 2.023	Yes	****	<0.0001			Sex	18.8	<0.0001	****	Yes					W1:KO F vs. W8:KO F	1.742	0.8283 to 2.655	Yes	****	<0.0001
Genotype	0.1584	0.7175	ns	No					W1:WT M vs. W1:KO M	-0.4057	-1.096 to 0.2849	No	ns	0.6488			Genotype	0.7731	0.3468	ns	No					W1:WT M vs. W1:KO M	-0.4476	-1.187 to 0.2922	No	ns	0.6067			Genotype	1.482	0.2189	ns	No					W1:WT M vs. W1:KO M	0.08437	-0.8602 to 1.029	No	ns	>0.9999
Time x Sex	13.51	0.0016	**	Yes					W1:WT F vs. W1:KO F	-0.1103	-0.7738 to 0.5532	No	ns	>0.9999			Time x Sex	4.813	0.0222	*	Yes					W1:WT F vs. W1:KO F	-0.07047	-0.7813 to 0.6403	No	ns	>0.9999			Time x Sex	8.534	0.0048	**	Yes					W1:WT F vs. W1:KO F	-0.5706	-1.617 to 0.4758	No	ns	0.7366
Time x Genotype	4.259	0.0656	ns	No					W8:WT M vs. W8:KO M	0.3714	-0.3452 to 1.088	No	ns	0.7997			Time x Genotype	1.1	0.2629	ns	No					W8:WT M vs. W8:KO M	0.07438	-0.6934 to 0.8421	No	ns	>0.9999			Time x Genotype	0.09762	0.75	ns	No					W8:WT M vs. W8:KO M	-0.3099	-1.210 to 0.5907	No	ns	0.9865
Sex x Genotype	0.05489	0.8313	ns	No					W8:WT F vs. W8:KO F	-0.02225	-0.7128 to 0.6684	No	ns	>0.9999			Sex x Genotype	0.2597	0.5843	ns	No					W8:WT F vs. W8:KO F	-0.02887	-0.8075 to 0.7498	No	ns	>0.9999			Sex x Genotype	0.2578	0.6051	ns	No					W8:WT F vs. W8:KO F	0.0223	-0.8455 to 0.8901	No	ns	>0.9999
Time x Sex x Genotype	2.702	0.1398	ns	No					W1:WT M vs. W1:WT F	-0.1113	-0.7748 to 0.5522	No	ns	>0.9999			Time x Sex x Genotype	0.799	0.339	ns	No					W1:WT M vs. W1:WT F	-0.3847	-1.096 to 0.3261	No	ns	0.7519			Time x Sex x Genotype	2.412	0.1191	ns	No					W1:WT M vs. W1:WT F	-0.8258	-1.833 to 0.1811	No	ns	0.1867
									W1:KO M vs. W1:KO F	0.1841	-0.5065 to 0.8747	No	ns	0.9987												W1:KO M vs. W1:KO F	-0.007582	-0.7474 to 0.7322	No	ns	>0.9999												W1:KO M vs. W1:KO F	-1.481	-2.467 to -0.4942	Yes	***	0.0006
ANOVA table	SS (Type III)	DF	MS	F (DFn, DFd)	P value				W8:WT M vs. W8:WT F	1.004	0.2872 to 1.720	Yes	**	0.0014			ANOVA table	SS (Type III)	DF	MS	F (DFn, DFd)	P value				W8:WT M vs. W8:WT F	0.445	-0.3602 to 1.250	No	ns	0.7271			ANOVA table	SS (Type III)	DF	MS	F (DFn, DFd)	P value				W8:WT M vs. W8:WT F	-0.3909	-1.291 to 0.5097	No	ns	0.9252
Time	1.61	1	1.61	F (1, 44) = 9.495	P=0.0035				W8:KO M vs. W8:KO F	0.6102	-0.08045 to 1.301	No	ns	0.1219			Time	12.49	1	12.49	F (1, 43) = 64.33	P<0.0001				W8:KO M vs. W8:KO F	0.3418	-0.3980 to 1.082	No	ns	0.8937			Time	10.55	1	10.55	F (1, 37) = 40.21	P<0.0001				W8:KO M vs. W8:KO F	-0.05865	-0.9265 to 0.8092	No	ns	>0.9999
Sex	2.298	1	2.298	F (1, 44) = 13.55	P=0.0006												Sex	0.1224	1	0.1224	F (1, 43) = 0.6306	P=0.4315												Sex	5.204	1	5.204	F (1, 37) = 19.84	P<0.0001
Genotype	0.02248	1	0.02248	F (1, 44) = 0.1326	P=0.7175												Genotype	0.1756	1	0.1756	F (1, 43) = 0.9047	P=0.3468												Genotype	0.4103	1	0.4103	F (1, 37) = 1.564	P=0.2189
Time x Sex	1.918	1	1.918	F (1, 44) = 11.31	P=0.0016												Time x Sex	1.094	1	1.094	F (1, 43) = 5.632	P=0.0222												Time x Sex	2.363	1	2.363	F (1, 37) = 9.006	P=0.0048
Time x Genotype	0.6046	1	0.6046	F (1, 44) = 3.565	P=0.0656												Time x Genotype	0.2498	1	0.2498	F (1, 43) = 1.287	P=0.2629												Time x Genotype	0.02703	1	0.02703	F (1, 37) = 0.1030	P=0.7500
Sex x Genotype	0.007792	1	0.007792	F (1, 44) = 0.04595	P=0.8313												Sex x Genotype	0.059	1	0.059	F (1, 43) = 0.3039	P=0.5843												Sex x Genotype	0.07137	1	0.07137	F (1, 37) = 0.2720	P=0.6051
Time x Sex x Genotype	0.3836	1	0.3836	F (1, 44) = 2.262	P=0.1398												Time x Sex x Genotype	0.1815	1	0.1815	F (1, 43) = 0.9349	P=0.3390												Time x Sex x Genotype	0.6677	1	0.6677	F (1, 37) = 2.545	P=0.1191
Residual	7.462	44	0.1696														Residual	8.348	43	0.1942

## Sheet: FIG7B
Ubiquitin/Ponceau; W1															Ubiquitin/Ponceau; W8
	MALE															MALE
	WT							IKKmkd								WT							IKKmkd
SHM	0.936982	0.885437	1.11207	1.19658				1.09002	0.789116	0.930233	1.19487				SHM	1.63168	1.49805	1.28713	1.49849	1.50303			1.43091	1.3303	1.94359	1.72
TEN	1.3268	1.34633	0.902985	1.22601	1.21014			1.55844	1	1.55822	2.7988				TEN	2.35251	2.37589	1.36998	1.4879	1.76232			1.93769	1.68246	1.12903	0.789392
	FEMALE															FEMALE
	WT							IKKmkd								WT							IKKmkd
SHM	1.11724	1.18	1.13793	1.13474				1.14421	0.979907	0.727273	0.90224	1.11534			SHM	0.722846	0.840376	1.39895	1.41568				1.64935	1.93646	1.4274
TEN	0.951157	1.06625	1.10789	2.08696	1.52381			1.16807	1.25895	1.24854	1.91538	1.66162	0.991571		TEN	1.70395	2.14737	2.29459	1.48				1.32808	2.22881	2.23359	1.23358
Three-way ANOVA	Ordinary							Šídák's multiple comparisons test	Mean Diff.	95.00% CI of diff.	Below threshold?	Summary	Adjusted P Value		Three-way ANOVA	Ordinary							Šídák's multiple comparisons test	Mean Diff.	95.00% CI of diff.	Below threshold?	Summary	Adjusted P Value
Alpha	0.05														Alpha	0.05
								SHM:WT Male vs. TEN:WT Male	-0.1697	-0.9029 to 0.5635	No	ns	0.9996										SHM:WT Male vs. TEN:WT Male	-0.386	-1.169 to 0.3966	No	ns	0.821
Source of Variation	% of total variation	P value	P value summary	Significant?				SHM:IKK Male vs. TEN:IKK Male	-0.7278	-1.501 to 0.04504	No	ns	0.0775		Source of Variation	% of total variation	P value	P value summary	Significant?				SHM:IKK Male vs. TEN:IKK Male	0.2216	-0.6534 to 1.097	No	ns	0.9989
Treatment	23.15	0.0033	**	Yes				SHM:WT Female vs. TEN:WT Female	-0.2047	-0.9379 to 0.5284	No	ns	0.9975		Treatment	9.466	0.067	ns	No				SHM:WT Female vs. TEN:WT Female	-0.812	-1.687 to 0.06297	No	ns	0.0848
Sex	0.1671	0.7872	ns	No				SHM:IKK Female vs. TEN:IKK Female	-0.4002	-1.062 to 0.2616	No	ns	0.5859		Sex	0.05899	0.8811	ns	No				SHM:IKK Female vs. TEN:IKK Female	-0.08494	-1.030 to 0.8601	No	ns	>0.9999
Genotype	1.277	0.4574	ns	No				SHM:WT Male vs. SHM:IKK Male	0.03171	-0.7411 to 0.8046	No	ns	>0.9999		Genotype	0.03398	0.9096	ns	No				SHM:WT Male vs. SHM:IKK Male	-0.1225	-0.9526 to 0.7076	No	ns	>0.9999
Treatment x Sex	0.8777	0.5372	ns	No				SHM:WT Female vs. SHM:IKK Female	0.1687	-0.5645 to 0.9019	No	ns	0.9996		Treatment x Sex	4.508	0.1984	ns	No				SHM:WT Female vs. SHM:IKK Female	-0.5766	-1.522 to 0.3685	No	ns	0.5627
Treatment x Genotype	5.825	0.1185	ns	No				TEN:WT Male vs. TEN:IKK Male	-0.5264	-1.260 to 0.2068	No	ns	0.3389		Treatment x Genotype	14.97	0.0238	*	Yes				TEN:WT Male vs. TEN:IKK Male	0.4851	-0.3450 to 1.315	No	ns	0.6232
Sex x Genotype	4.156	0.1846	ns	No				TEN:WT Female vs. TEN:IKK Female	-0.02681	-0.6886 to 0.6350	No	ns	>0.9999		Sex x Genotype	5.226	0.1672	ns	No				TEN:WT Female vs. TEN:IKK Female	0.1505	-0.7245 to 1.025	No	ns	>0.9999
Treatment x Sex x Genotype	1.349	0.4451	ns	No				SHM:WT Male vs. SHM:WT Female	-0.1097	-0.8826 to 0.6631	No	ns	>0.9999		Treatment x Sex x Genotype	0.1199	0.8311	ns	No				SHM:WT Male vs. SHM:WT Female	0.3892	-0.4409 to 1.219	No	ns	0.8636
								SHM:IKK Male vs. SHM:IKK Female	0.02726	-0.7059 to 0.7604	No	ns	>0.9999										SHM:IKK Male vs. SHM:IKK Female	-0.06487	-1.010 to 0.8802	No	ns	>0.9999
ANOVA table	SS (Type III)	DF	MS	F (DFn, DFd)	P value			TEN:WT Male vs. TEN:WT Female	-0.1448	-0.8360 to 0.5465	No	ns	0.9999		ANOVA table	SS (Type III)	DF	MS	F (DFn, DFd)	P value			TEN:WT Male vs. TEN:WT Female	-0.03676	-0.8668 to 0.7933	No	ns	>0.9999
Treatment	1.278	1	1.278	F (1, 29) = 10.29	P=0.0033			TEN:IKK Male vs. TEN:IKK Female	0.3548	-0.3507 to 1.060	No	ns	0.8111		Treatment	0.5681	1	0.5681	F (1, 25) = 3.666	P=0.0670			TEN:IKK Male vs. TEN:IKK Female	-0.3714	-1.246 to 0.5036	No	ns	0.925
Sex	0.009221	1	0.009221	F (1, 29) = 0.07424	P=0.7872										Sex	0.00354	1	0.00354	F (1, 25) = 0.02285	P=0.8811
Genotype	0.07047	1	0.07047	F (1, 29) = 0.5673	P=0.4574										Genotype	0.002039	1	0.002039	F (1, 25) = 0.01316	P=0.9096
Treatment x Sex	0.04844	1	0.04844	F (1, 29) = 0.3900	P=0.5372										Treatment x Sex	0.2705	1	0.2705	F (1, 25) = 1.746	P=0.1984
Treatment x Genotype	0.3215	1	0.3215	F (1, 29) = 2.588	P=0.1185										Treatment x Genotype	0.8982	1	0.8982	F (1, 25) = 5.797	P=0.0238
Sex x Genotype	0.2294	1	0.2294	F (1, 29) = 1.847	P=0.1846										Sex x Genotype	0.3136	1	0.3136	F (1, 25) = 2.024	P=0.1672
Treatment x Sex x Genotype	0.07443	1	0.07443	F (1, 29) = 0.5993	P=0.4451										Treatment x Sex x Genotype	0.007197	1	0.007197	F (1, 25) = 0.04645	P=0.8311
Residual	3.602	29	0.1242												Residual	3.874	25	0.1549

## Sheet: FIG7C
Relative Lc3b Expression																	Relative Gabarapl1 Expression																	Relative Bnip3 Expression
	MALE																	MALE																	MALE
	WT								IKKmkd									WT								IKKmkd									WT								IKKmkd
W1	0.659966	0.949742	0.886176	1.28397	1.18225	1.50277			0.736393	0.819195	0.980735	0.92112		0.721628			W1	1.19113	1.1877	1.19556	2.12771	1.49672				1.2101	1.07916	0.855139		1.46221				W1	0.73101	0.696428		1.77345	1.39133				0.686447	0.733223	0.67564		0.528781
W2	1.4215	1.00544	0.996485						0.934618	1.22137	0.969613	0.997989	1.13357				W2	1.47671	1.08913	1.31956						1.41425	1.17212	1.03134	1.40682	1.28952				W2	1.42403	1.05321	1.11399						1.16003	1.27555	0.994457	1.32911	1.44345
W8	1.30755	1.22147	0.859027	0.747736	0.859012	0.700787			1.17421	1.07304	1.05162	0.591432	1.03931	1.12309			W8	1.13671	0.89468	1.49043	1.01385	1.5096	1.45186		1.86593	1.33129	1.48209	1.49151	0.835135	1.67758	2.08386			W8	1.09992	1.02751	1.24824	0.999007	1.35913	1.25937		1.80924	1.24453	1.43619	1.68956	1.10934	1.45175	1.57103
	FEMALE																	FEMALE																	FEMALE
	WT								IKKmkd									WT								IKKmkd									WT								IKKmkd
W1	0.834111	0.804491	0.752405			1.32297	1.04883		0.74476	0.646857	0.68702	0.837199	0.99898				W1	0.76107	0.669588			1.03703	1.71507			0.855428	0.726109	0.882085	0.931601		1.33081	1.17		W1	0.553311				0.836445	0.718208			0.4535	0.426427	0.427527	1.10222		0.856166	2.19365
W2	0.690651	0.850561			0.751875	0.704284	0.86835		0.518158	0.850678		0.986581	0.949987				W2	0.897925	1.21222			1.13836	1.0686	1.33811		0.893905	1.52552		1.03268	1.14977				W2	1.03826	0.933832			0.905553	1.16037	1.20197		0.903395	1.22607		0.9802	1.07795
W8	1.22786		0.989805	1.21074	0.729952	0.843482	0.994112		1.24513	1.04413	0.849031	1.11114	1.23499		1.45775		W8	1.07326		1.19528	0.887775	1.23479	0.883228	1.19321		0.731196	0.936111	1.90018	1.85715	1.09127	1.8995	1.11848		W8	0.948304	0.848788	0.907878	0.835663	1.01732				0.446437	1.43111	1.70978	1.22948	0.992917	0.837049
Three-way ANOVA	Ordinary							Original FDR method of Benjamini and Hochberg	Q: 5%								Three-way ANOVA	Ordinary							Original FDR method of Benjamini and Hochberg	Q: 5%								Three-way ANOVA	Ordinary								Original FDR method of Benjamini and Hochberg	Q: 5%
Alpha	0.05									Discovery?	P value	q value					Alpha	0.05									Discovery?	P value	q value					Alpha	0.05										Discovery?	P value	q value
								M	W1	No	0.128995	0.396611													M	W1	No	0.258698	0.851743														M	W1	No	0.114275	0.27426
Source of Variation	% of total variation	P value	P value summary	Significant?					W2	No	0.501074	0.789192					Source of Variation	% of total variation	P value	P value summary	Significant?					W2	No	0.807974	0.942225					Source of Variation	% of total variation	P value	P value summary	Significant?						W2	No	0.753475	0.904549
Time	5.209	0.161	ns	No					W8	No	0.667497	0.801663					Time	4.183	0.2699	ns	No					W8	No	0.269493	0.851743					Time	13.54	0.0148	*	Yes						W8	No	0.037007	0.124344
Sex	4.427	0.0787	ns	No				F	W1	No	0.204386	0.482861					Sex	8.571	0.0229	*	Yes				F	W1	No	0.685281	0.942225					Sex	6.77	0.0368	*	Yes					F	W1	No	0.807633	0.904549
Genotype	0.7178	0.4732	ns	No					W2	No	0.619871	0.801663					Genotype	0.02508	0.8995	ns	No					W2	No	0.897357	0.942225					Genotype	0.0615	0.8385	ns	No						W2	No	0.990729	0.92468
Time x Sex	12.48	0.0154	*	Yes					W8	No	0.399998	0.755997					Time x Sex	0.6604	0.8095	ns	No					W8	No	0.189104	0.851743					Time x Sex	1.777	0.5493	ns	No						W8	No	0.362712	0.677062
Time x Genotype	9.031	0.0456	*	Yes				M WT	W1-W2	No	0.763489	0.801663					Time x Genotype	5.979	0.157	ns	No				M WT	W1-W2	No	0.592631	0.942225					Time x Genotype	3.144	0.3501	ns	No					M WT	W1-W2	No	0.886123	0.92468
Sex x Genotype	1.325	0.331	ns	No					W1-W8	No	0.445786	0.765942					Sex x Genotype	0.9902	0.4287	ns	No					W1-W8	No	0.375577	0.877769					Sex x Genotype	2.288	0.2176	ns	No						W1-W8	No	0.938743	0.92468
Time x Sex x Genotype	0.09435	0.9663	ns	No					W2-W8	No	0.314485	0.660418					Time x Sex x Genotype	0.2311	0.9285	ns	No					W2-W8	No	0.803677	0.942225					Time x Sex x Genotype	4.449	0.2296	ns	No						W2-W8	No	0.790755	0.904549
								M KO	W1-W2	No	0.0197873	0.18699													M KO	W1-W2	No	0.449228	0.877769														M KO	W1-W2	Yes	0.0004699	0.00394716
ANOVA table	SS (Type III)	DF	MS	F (DFn, DFd)	P value				W1-W8	No	0.135392	0.396611					ANOVA table	SS (Type III)	DF	MS	F (DFn, DFd)	P value				W1-W8	No	0.190644	0.851743					ANOVA table	SS (Type III)	DF	MS	F (DFn, DFd)	P value					W1-W8	Yes	0.00015212	0.00255562
Time	0.1596	2	0.07979	F (2, 50) = 1.895	P=0.1610				W2-W8	No	0.699149	0.801663					Time	0.2945	2	0.1473	F (2, 50) = 1.345	P=0.2699				W2-W8	No	0.290325	0.851743					Time	1.064	2	0.5318	F (2, 46) = 4.624	P=0.0148					W2-W8	No	0.168551	0.353958
Sex	0.1356	1	0.1356	F (1, 50) = 3.221	P=0.0787			F WT	W1-W2	No	0.146893	0.396611					Sex	0.6035	1	0.6035	F (1, 50) = 5.511	P=0.0229			F WT	W1-W2	No	0.714102	0.942225					Sex	0.5319	1	0.5319	F (1, 46) = 4.625	P=0.0368				F WT	W1-W2	No	0.0129947	0.0727705
Genotype	0.02199	1	0.02199	F (1, 50) = 0.5223	P=0.4732				W1-W8	No	0.727844	0.801663					Genotype	0.001766	1	0.001766	F (1, 50) = 0.01613	P=0.8995				W1-W8	No	0.878166	0.942225					Genotype	0.004832	1	0.004832	F (1, 46) = 0.04201	P=0.8385					W1-W8	No	0.0312134	0.124344
Time x Sex	0.3823	2	0.1911	F (2, 50) = 4.540	P=0.0154				W2-W8	No	0.0409622	0.193546					Time x Sex	0.0465	2	0.02325	F (2, 50) = 0.2123	P=0.8095				W2-W8	No	0.599257	0.942225					Time x Sex	0.1396	2	0.0698	F (2, 46) = 0.6069	P=0.5493					W2-W8	No	0.0791383	0.221587
Time x Genotype	0.2767	2	0.1383	F (2, 50) = 3.286	P=0.0456			F KO	W1-W2	No	0.723198	0.801663					Time x Genotype	0.421	2	0.2105	F (2, 50) = 1.922	P=0.1570			F KO	W1-W2	No	0.31546	0.851743					Time x Genotype	0.247	2	0.1235	F (2, 46) = 1.074	P=0.3501				F KO	W1-W2	No	0.709695	0.904549
Sex x Genotype	0.04058	1	0.04058	F (1, 50) = 0.9638	P=0.3310				W1-W8	No	0.00756768	0.143029					Sex x Genotype	0.06972	1	0.06972	F (1, 50) = 0.6366	P=0.4287				W1-W8	No	0.118799	0.851743					Sex x Genotype	0.1797	1	0.1797	F (1, 46) = 1.563	P=0.2176					W1-W8	No	0.567921	0.904549
Time x Sex x Genotype	0.002891	2	0.001445	F (2, 50) = 0.03432	P=0.9663				W2-W8	No	0.0401011	0.193546					Time x Sex x Genotype	0.01627	2	0.008137	F (2, 50) = 0.07429	P=0.9285				W2-W8	No	0.464428	0.877769					Time x Sex x Genotype	0.3496	2	0.1748	F (2, 46) = 1.520	P=0.2296					W2-W8	No	0.802406	0.904549
Residual	2.105	50	0.04211														Residual	5.476	50	0.1095														Residual	5.29	46	0.115

## Sheet: FIG7D
LC3II/LC3II; W1																	LC3II/LC3II; W8																p62/Actin; W1
	MALE																	MALE																MALE
	WT								IKKmkd									WT								IKKmkd								WT								IKKmkd
SHM	0.427746		1.2439	0.557143	1.11935				1.18684	0.592537	0.881944	1.23984					SHM	1.12681	1.03478	0.887273	0.614035	1.30144				1.3258		1.30417	1.1092	1.03053			SHM	0.172864	0.182515	0.240773	0.367488	0.3049				0.369565	0.127811	0.252955	0.130909
TEN	0.663968	0.6472	1.41935	1.4526	1.18317	0.764706	1.92241		1.76557	0.686957	0.977695	1.08621	0.40587	1.70611	2.88158		TEN	1.26425		1.30488	1.73516	2.70748	1.31046	1.37719		1.07801	1.13725	1.52664	1.47458	1.37786	2.49776		TEN	0.37284	0.292453	0.382911	0.626984	0.313768	0.166871	0.319171		0.268199	0.227826	0.43	0.132258	0.778325	0.151634
	FEMALE																	FEMALE																FEMALE
	WT								IKKmkd									WT								IKKmkd								WT								IKKmkd
SHM	0.36	0.376417	0.50297	0.623037	0.531746				0.512685	0.40587	1.98429	0.243711	0.90027	1.07583			SHM	1.15698	0.609091	1	1.2					0.667376	1.26974	0.992908	1.3913	1.03213			SHM	0.0897183	0.392818	0.156972	0.159217					0.270468	0.174815	0.278365	0.294466	0.219835	0.173134
TEN	0.963722	0.770476	2.14939	0.717489	0.505882	0.809218			0.22467	0.221277	1.95062	0.7625	0.541929	0.479167			TEN	1.09714	1.23404	0.982456	1.25741	1.46667	1.30526	1.63158		0.930108	1.01471	0.786458	1.53292	1.06111	2.3956		TEN	0.15309	0.204848	0.29432	0.407339	0.223333	0.428358			0.26069	0.110167	0.289125	0.294488	0.332039	0.325437	0.163636
Three-way ANOVA	Ordinary								Šídák's multiple comparisons test	Mean Diff.	95.00% CI of diff.	Below threshold?	Summary	Adjusted P Value			Three-way ANOVA	Ordinary								Šídák's multiple comparisons test	Mean Diff.	95.00% CI of diff.	Below threshold?	Summary	Adjusted P Value		Three-way ANOVA	Ordinary								Šídák's multiple comparisons test	Mean Diff.	95.00% CI of diff.	Below threshold?	Summary	Adjusted P Value
Alpha	0.05																Alpha	0.05															Alpha	0.05
									SHM:WT Male vs. TEN:WT Male	-0.3135	-1.411 to 0.7846	No	ns	0.9974												SHM:WT Male vs. TEN:WT Male	-0.6237	-1.442 to 0.1947	No	ns	0.2685											SHM:WT Male vs. TEN:WT Male	-0.09986	-0.3370 to 0.1372	No	ns	0.9387
Source of Variation	% of total variation	P value	P value summary	Significant?					SHM:IKK Male vs. TEN:IKK Male	-0.3833	-1.481 to 0.7147	No	ns	0.9848			Source of Variation	% of total variation	P value	P value summary	Significant?					SHM:IKK Male vs. TEN:IKK Male	-0.3229	-1.195 to 0.5495	No	ns	0.9754		Source of Variation	% of total variation	P value	P value summary	Significant?					SHM:IKK Male vs. TEN:IKK Male	-0.1111	-0.3725 to 0.1503	No	ns	0.935
Treatment	4.82	0.1439	ns	No					SHM:WT Female vs. TEN:WT Female	-0.5072	-1.568 to 0.5536	No	ns	0.8652			Treatment	11.5	0.0273	*	Yes					SHM:WT Female vs. TEN:WT Female	-0.102	-0.9491 to 0.7451	No	ns	>0.9999		Treatment	8.709	0.0596	ns	No					SHM:WT Female vs. TEN:WT Female	-0.08553	-0.3469 to 0.1759	No	ns	0.9911
Sex	7.503	0.0705	ns	No					SHM:IKK Female vs. TEN:IKK Female	0.1571	-0.8543 to 1.169	No	ns	>0.9999			Sex	5.5	0.1202	ns	No					SHM:IKK Female vs. TEN:IKK Female	-0.2161	-1.035 to 0.6023	No	ns	0.9987		Sex	3.013	0.2604	ns	No					SHM:IKK Female vs. TEN:IKK Female	-0.01847	-0.2438 to 0.2068	No	ns	>0.9999
Genotype	0.8207	0.5416	ns	No					SHM:WT Male vs. SHM:IKK Male	-0.1383	-1.377 to 1.100	No	ns	>0.9999			Genotype	0.9886	0.504	ns	No					SHM:WT Male vs. SHM:IKK Male	-0.1996	-1.106 to 0.7071	No	ns	0.9998		Genotype	0.2343	0.7517	ns	No					SHM:WT Male vs. SHM:IKK Male	0.0334	-0.2382 to 0.3050	No	ns	>0.9999
Treatment x Sex	0.5285	0.624	ns	No					SHM:WT Female vs. SHM:IKK Female	-0.3749	-1.436 to 0.6859	No	ns	0.9832			Treatment x Sex	2.84	0.2602	ns	No					SHM:WT Female vs. SHM:IKK Female	-0.07917	-0.9858 to 0.8275	No	ns	>0.9999		Treatment x Sex	1.004	0.5135	ns	No					SHM:WT Female vs. SHM:IKK Female	-0.0355	-0.2969 to 0.2259	No	ns	>0.9999
Treatment x Genotype	1.554	0.402	ns	No					TEN:WT Male vs. TEN:IKK Male	-0.2081	-1.144 to 0.7283	No	ns	0.9998			Treatment x Genotype	0.2504	0.736	ns	No					TEN:WT Male vs. TEN:IKK Male	0.1012	-0.6791 to 0.8815	No	ns	>0.9999		Treatment x Genotype	0.274	0.7323	ns	No					TEN:WT Male vs. TEN:IKK Male	0.0222	-0.2031 to 0.2475	No	ns	>0.9999
Sex x Genotype	0.299	0.7121	ns	No					TEN:WT Female vs. TEN:IKK Female	0.2893	-0.7221 to 1.301	No	ns	0.9973			Sex x Genotype	0.218	0.753	ns	No					TEN:WT Female vs. TEN:IKK Female	-0.1933	-0.9452 to 0.5586	No	ns	0.999		Sex x Genotype	0.3112	0.7155	ns	No					TEN:WT Female vs. TEN:IKK Female	0.03156	-0.1937 to 0.2568	No	ns	>0.9999
Treatment x Sex x Genotype	2.37	0.3019	ns	No					SHM:WT Male vs. SHM:WT Female	0.3582	-0.8170 to 1.533	No	ns	0.9952			Treatment x Sex x Genotype	1.238	0.455	ns	No					SHM:WT Male vs. SHM:WT Female	0.001351	-0.9053 to 0.9080	No	ns	>0.9999		Treatment x Sex x Genotype	0.5378	0.632	ns	No					SHM:WT Male vs. SHM:WT Female	0.05403	-0.2176 to 0.3257	No	ns	>0.9999
									SHM:IKK Male vs. SHM:IKK Female	0.1215	-1.009 to 1.252	No	ns	>0.9999												SHM:IKK Male vs. SHM:IKK Female	0.1217	-0.7849 to 1.028	No	ns	>0.9999											SHM:IKK Male vs. SHM:IKK Female	-0.01487	-0.2763 to 0.2465	No	ns	>0.9999
ANOVA table	SS (Type III)	DF	MS	F (DFn, DFd)	P value				TEN:WT Male vs. TEN:WT Female	0.1645	-0.8102 to 1.139	No	ns	>0.9999			ANOVA table	SS (Type III)	DF	MS	F (DFn, DFd)	P value				TEN:WT Male vs. TEN:WT Female	0.5231	-0.2289 to 1.275	No	ns	0.3918		ANOVA table	SS (Type III)	DF	MS	F (DFn, DFd)	P value				TEN:WT Male vs. TEN:WT Female	0.06836	-0.1569 to 0.2936	No	ns	0.9954
Treatment	0.7376	1	0.7376	F (1, 37) = 2.229	P=0.1439				TEN:IKK Male vs. TEN:IKK Female	0.6619	-0.3128 to 1.637	No	ns	0.4293			Treatment	1.037	1	1.037	F (1, 35) = 5.304	P=0.0273				TEN:IKK Male vs. TEN:IKK Female	0.2285	-0.5518 to 1.009	No	ns	0.9966		Treatment	0.06676	1	0.06676	F (1, 37) = 3.776	P=0.0596				TEN:IKK Male vs. TEN:IKK Female	0.07772	-0.1476 to 0.3030	No	ns	0.9862
Sex	1.148	1	1.148	F (1, 37) = 3.470	P=0.0705												Sex	0.4959	1	0.4959	F (1, 35) = 2.537	P=0.1202											Sex	0.02309	1	0.02309	F (1, 37) = 1.306	P=0.2604
Genotype	0.1256	1	0.1256	F (1, 37) = 0.3795	P=0.5416												Genotype	0.08912	1	0.08912	F (1, 35) = 0.4559	P=0.5040											Genotype	0.001796	1	0.001796	F (1, 37) = 0.1016	P=0.7517
Treatment x Sex	0.08087	1	0.08087	F (1, 37) = 0.2444	P=0.6240												Treatment x Sex	0.256	1	0.256	F (1, 35) = 1.310	P=0.2602											Treatment x Sex	0.007694	1	0.007694	F (1, 37) = 0.4352	P=0.5135
Treatment x Genotype	0.2378	1	0.2378	F (1, 37) = 0.7188	P=0.4020												Treatment x Genotype	0.02258	1	0.02258	F (1, 35) = 0.1155	P=0.7360											Treatment x Genotype	0.0021	1	0.0021	F (1, 37) = 0.1188	P=0.7323
Sex x Genotype	0.04576	1	0.04576	F (1, 37) = 0.1383	P=0.7121												Sex x Genotype	0.01966	1	0.01966	F (1, 35) = 0.1006	P=0.7530											Sex x Genotype	0.002386	1	0.002386	F (1, 37) = 0.1349	P=0.7155
Treatment x Sex x Genotype	0.3627	1	0.3627	F (1, 37) = 1.096	P=0.3019												Treatment x Sex x Genotype	0.1116	1	0.1116	F (1, 35) = 0.5708	P=0.4550											Treatment x Sex x Genotype	0.004122	1	0.004122	F (1, 37) = 0.2332	P=0.6320
Residual	12.24	37	0.3309														Residual	6.842	35	0.1955													Residual	0.6541	37	0.01768
[truncated: 13 more columns]
