# Supplementary figures and images for: Tenotomy-induced muscle atrophy is sex-specific and independent of NFκB
Source: eLife journal article supplement (doi:10.7554/elife.82016), 2022-12-12

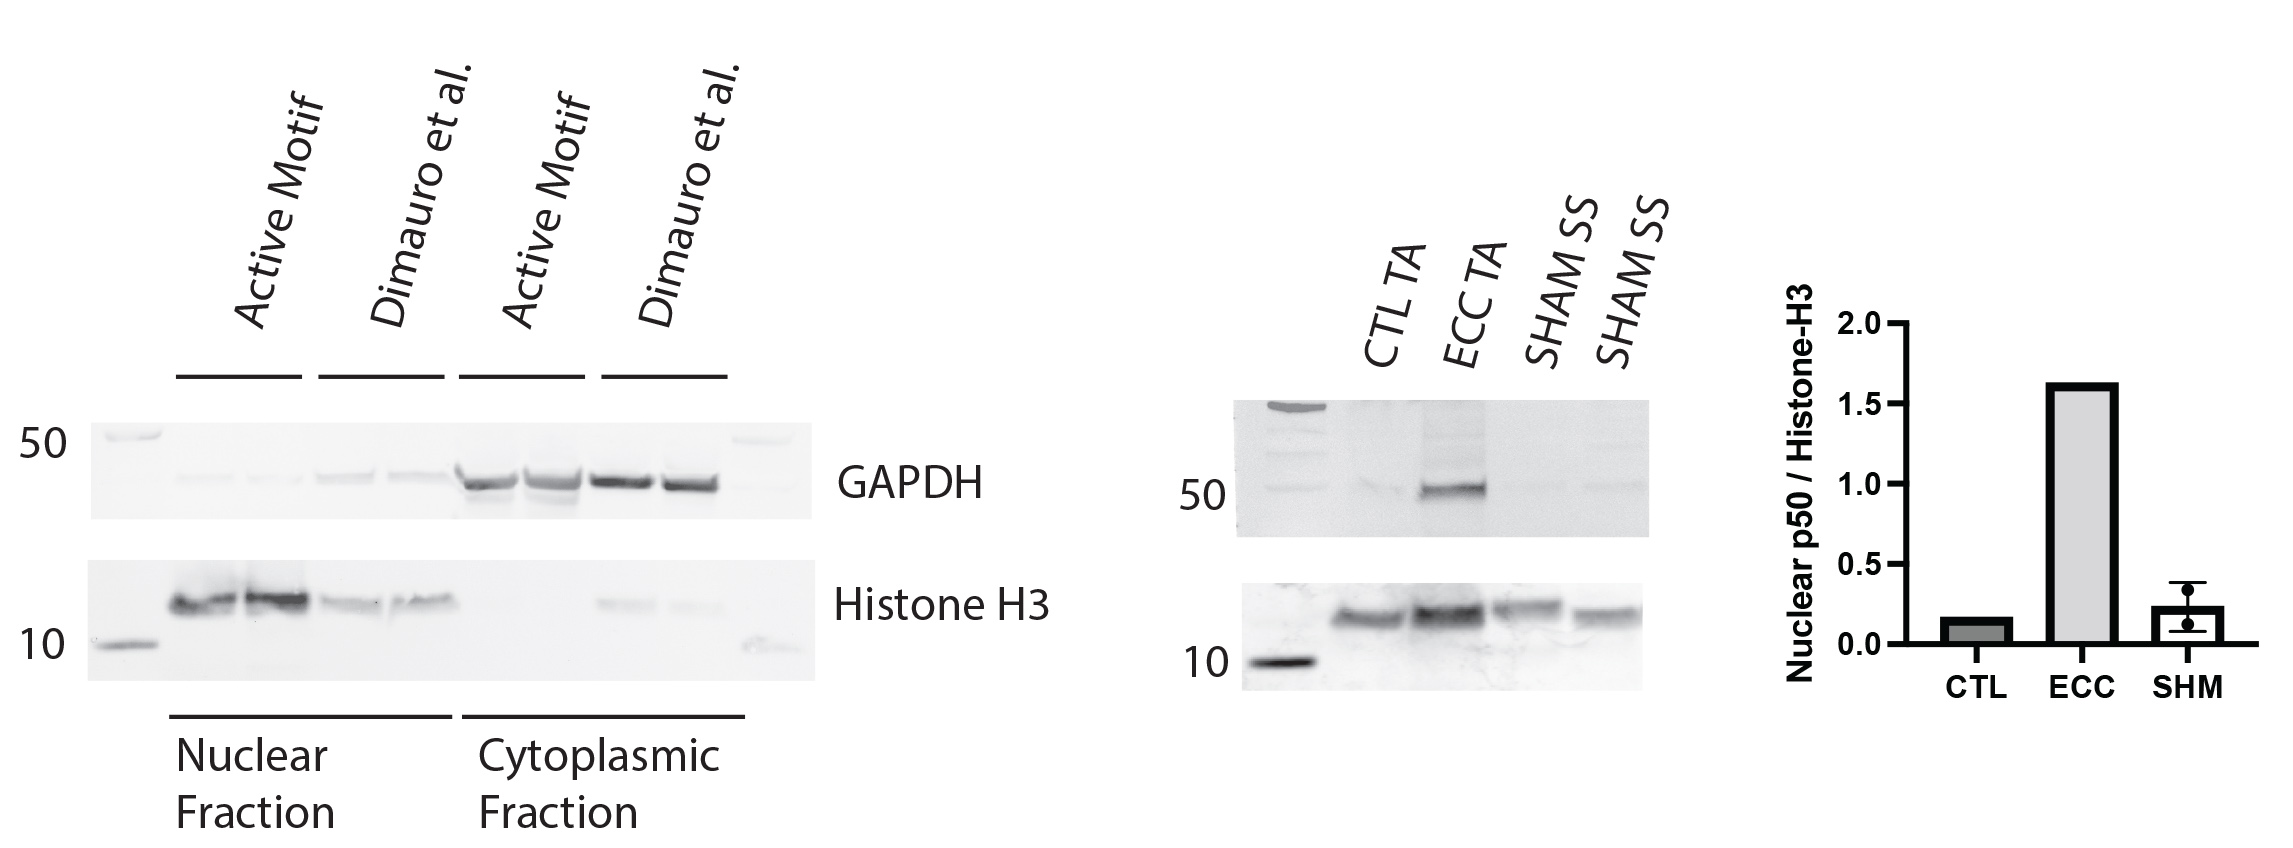

Supplement: supp [file elife-82016-supp-v1.zip › elife_poa_e82016_Figure_2_figure_supplement_1.jpg]

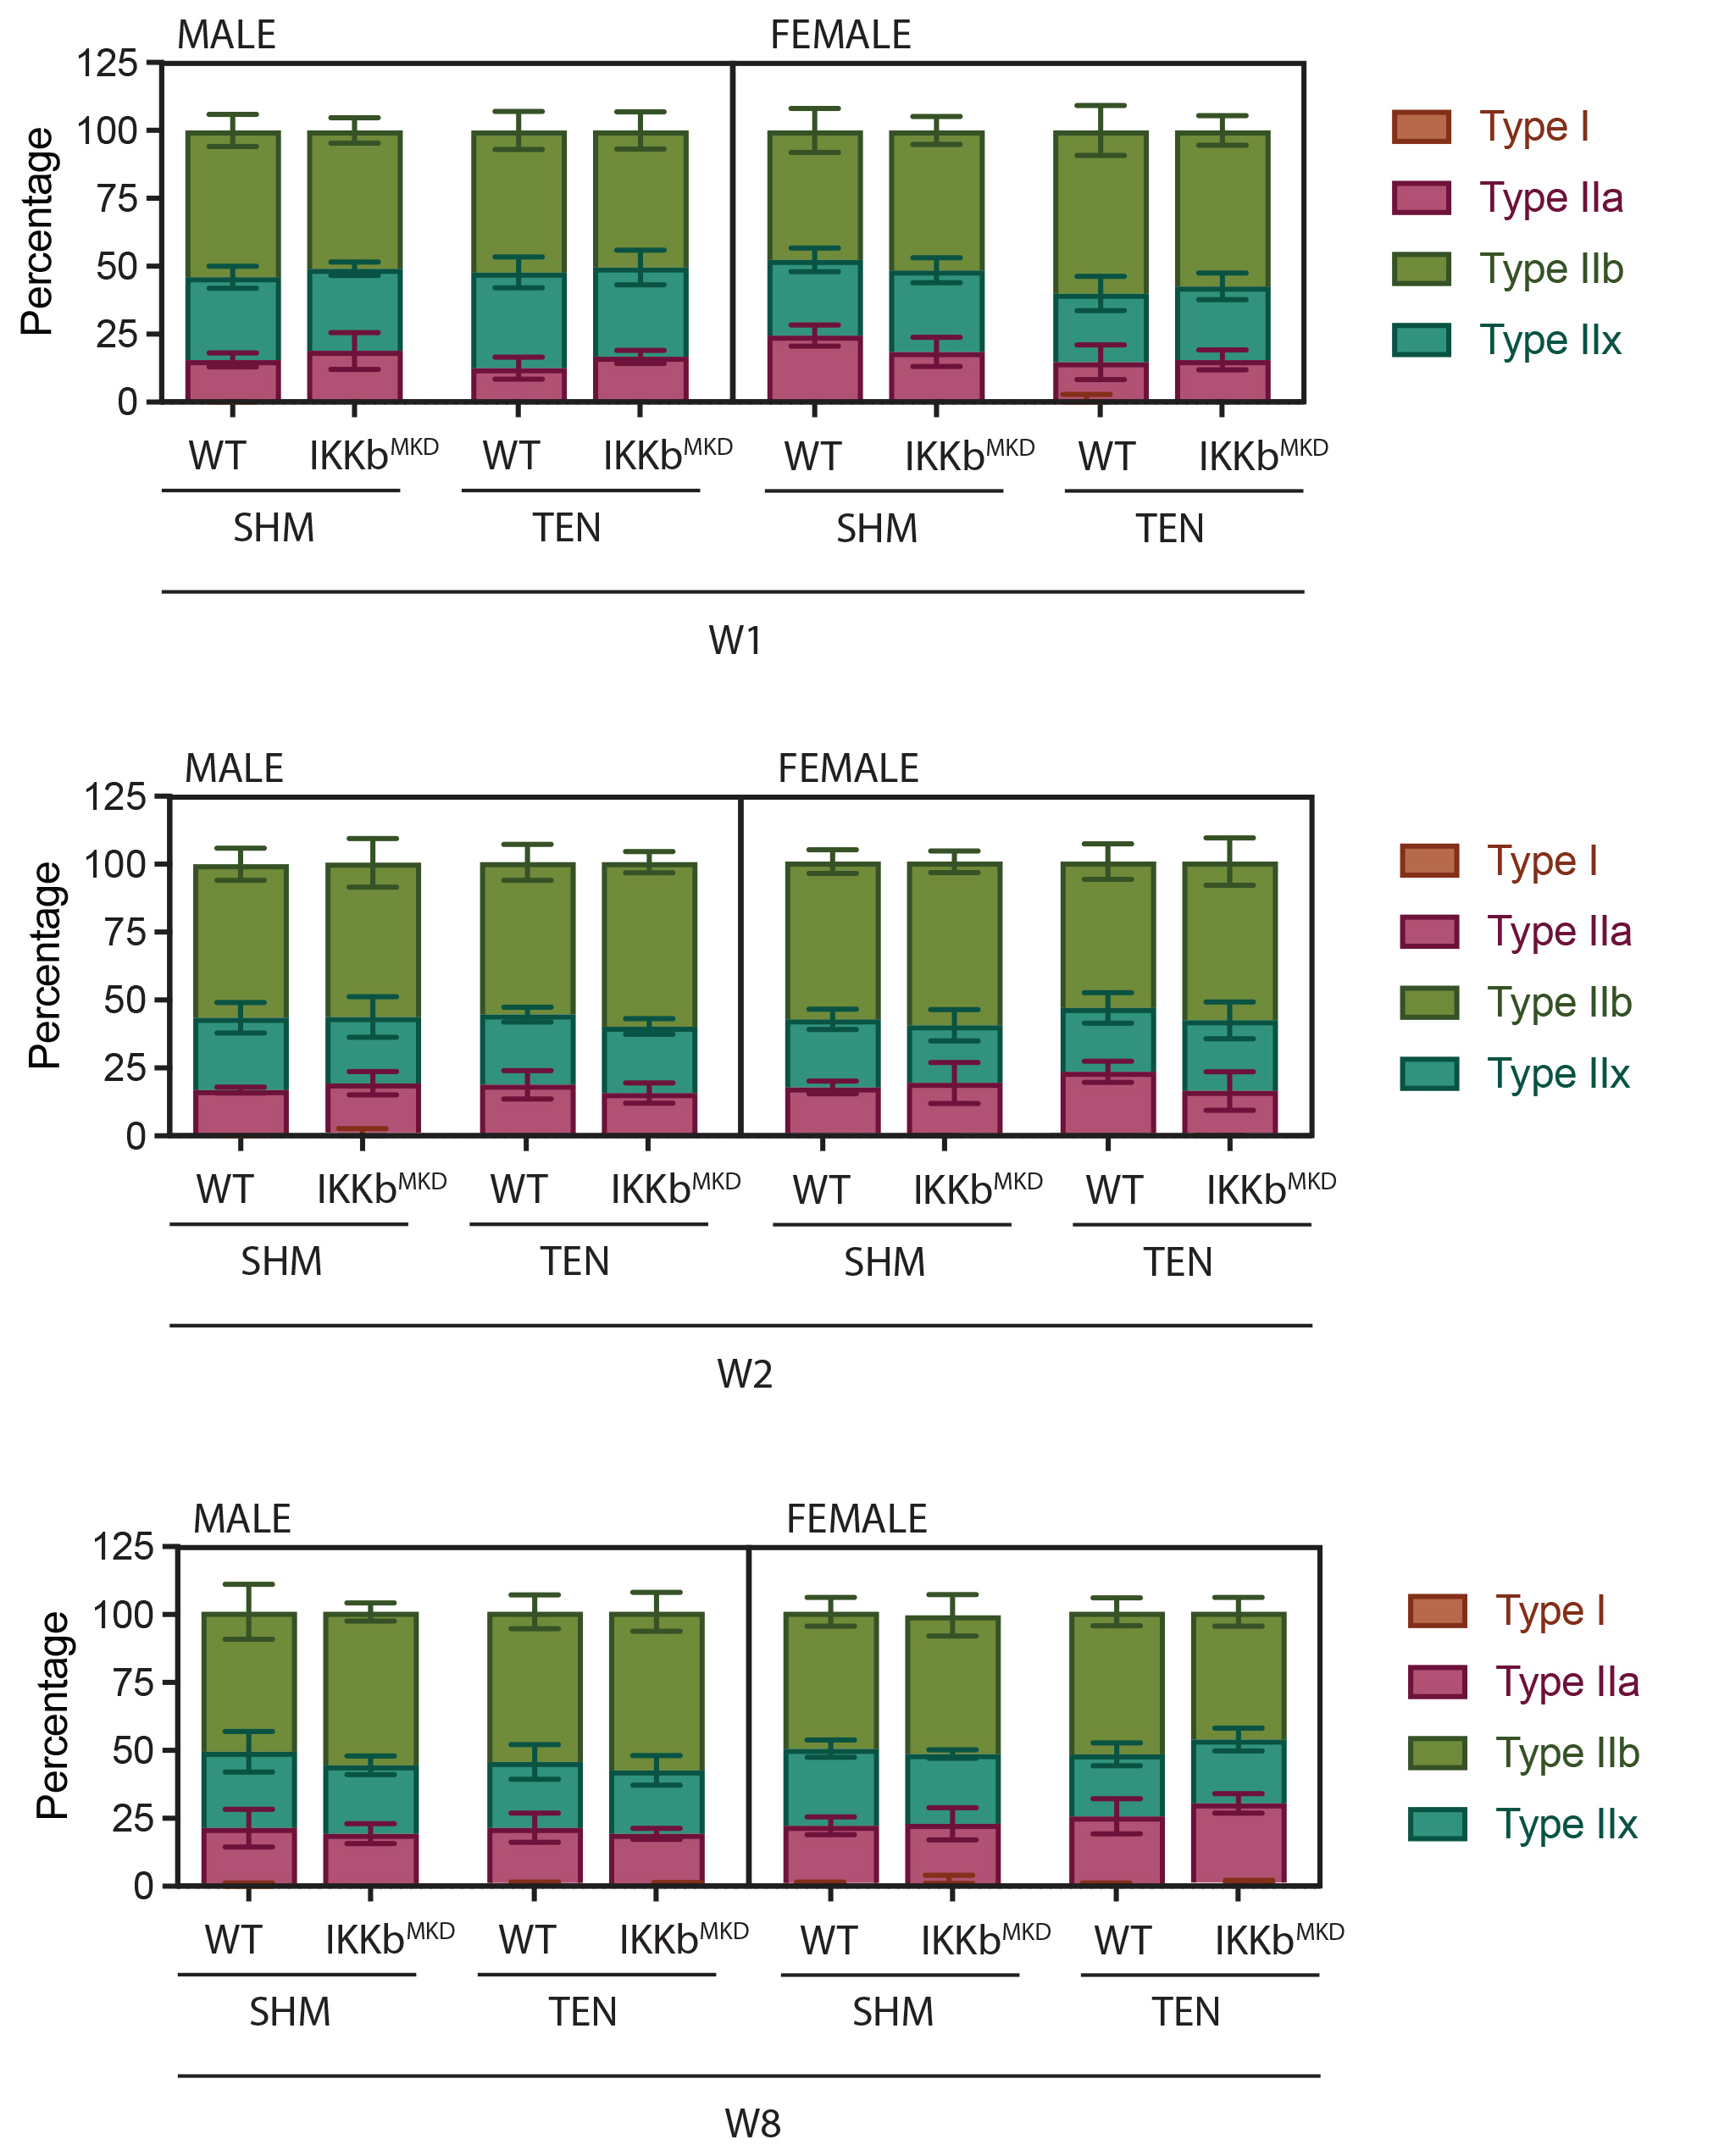

Supplement: supp [file elife-82016-supp-v1.zip › elife_poa_e82016_Figure_5_figure_supplement_1.jpg]

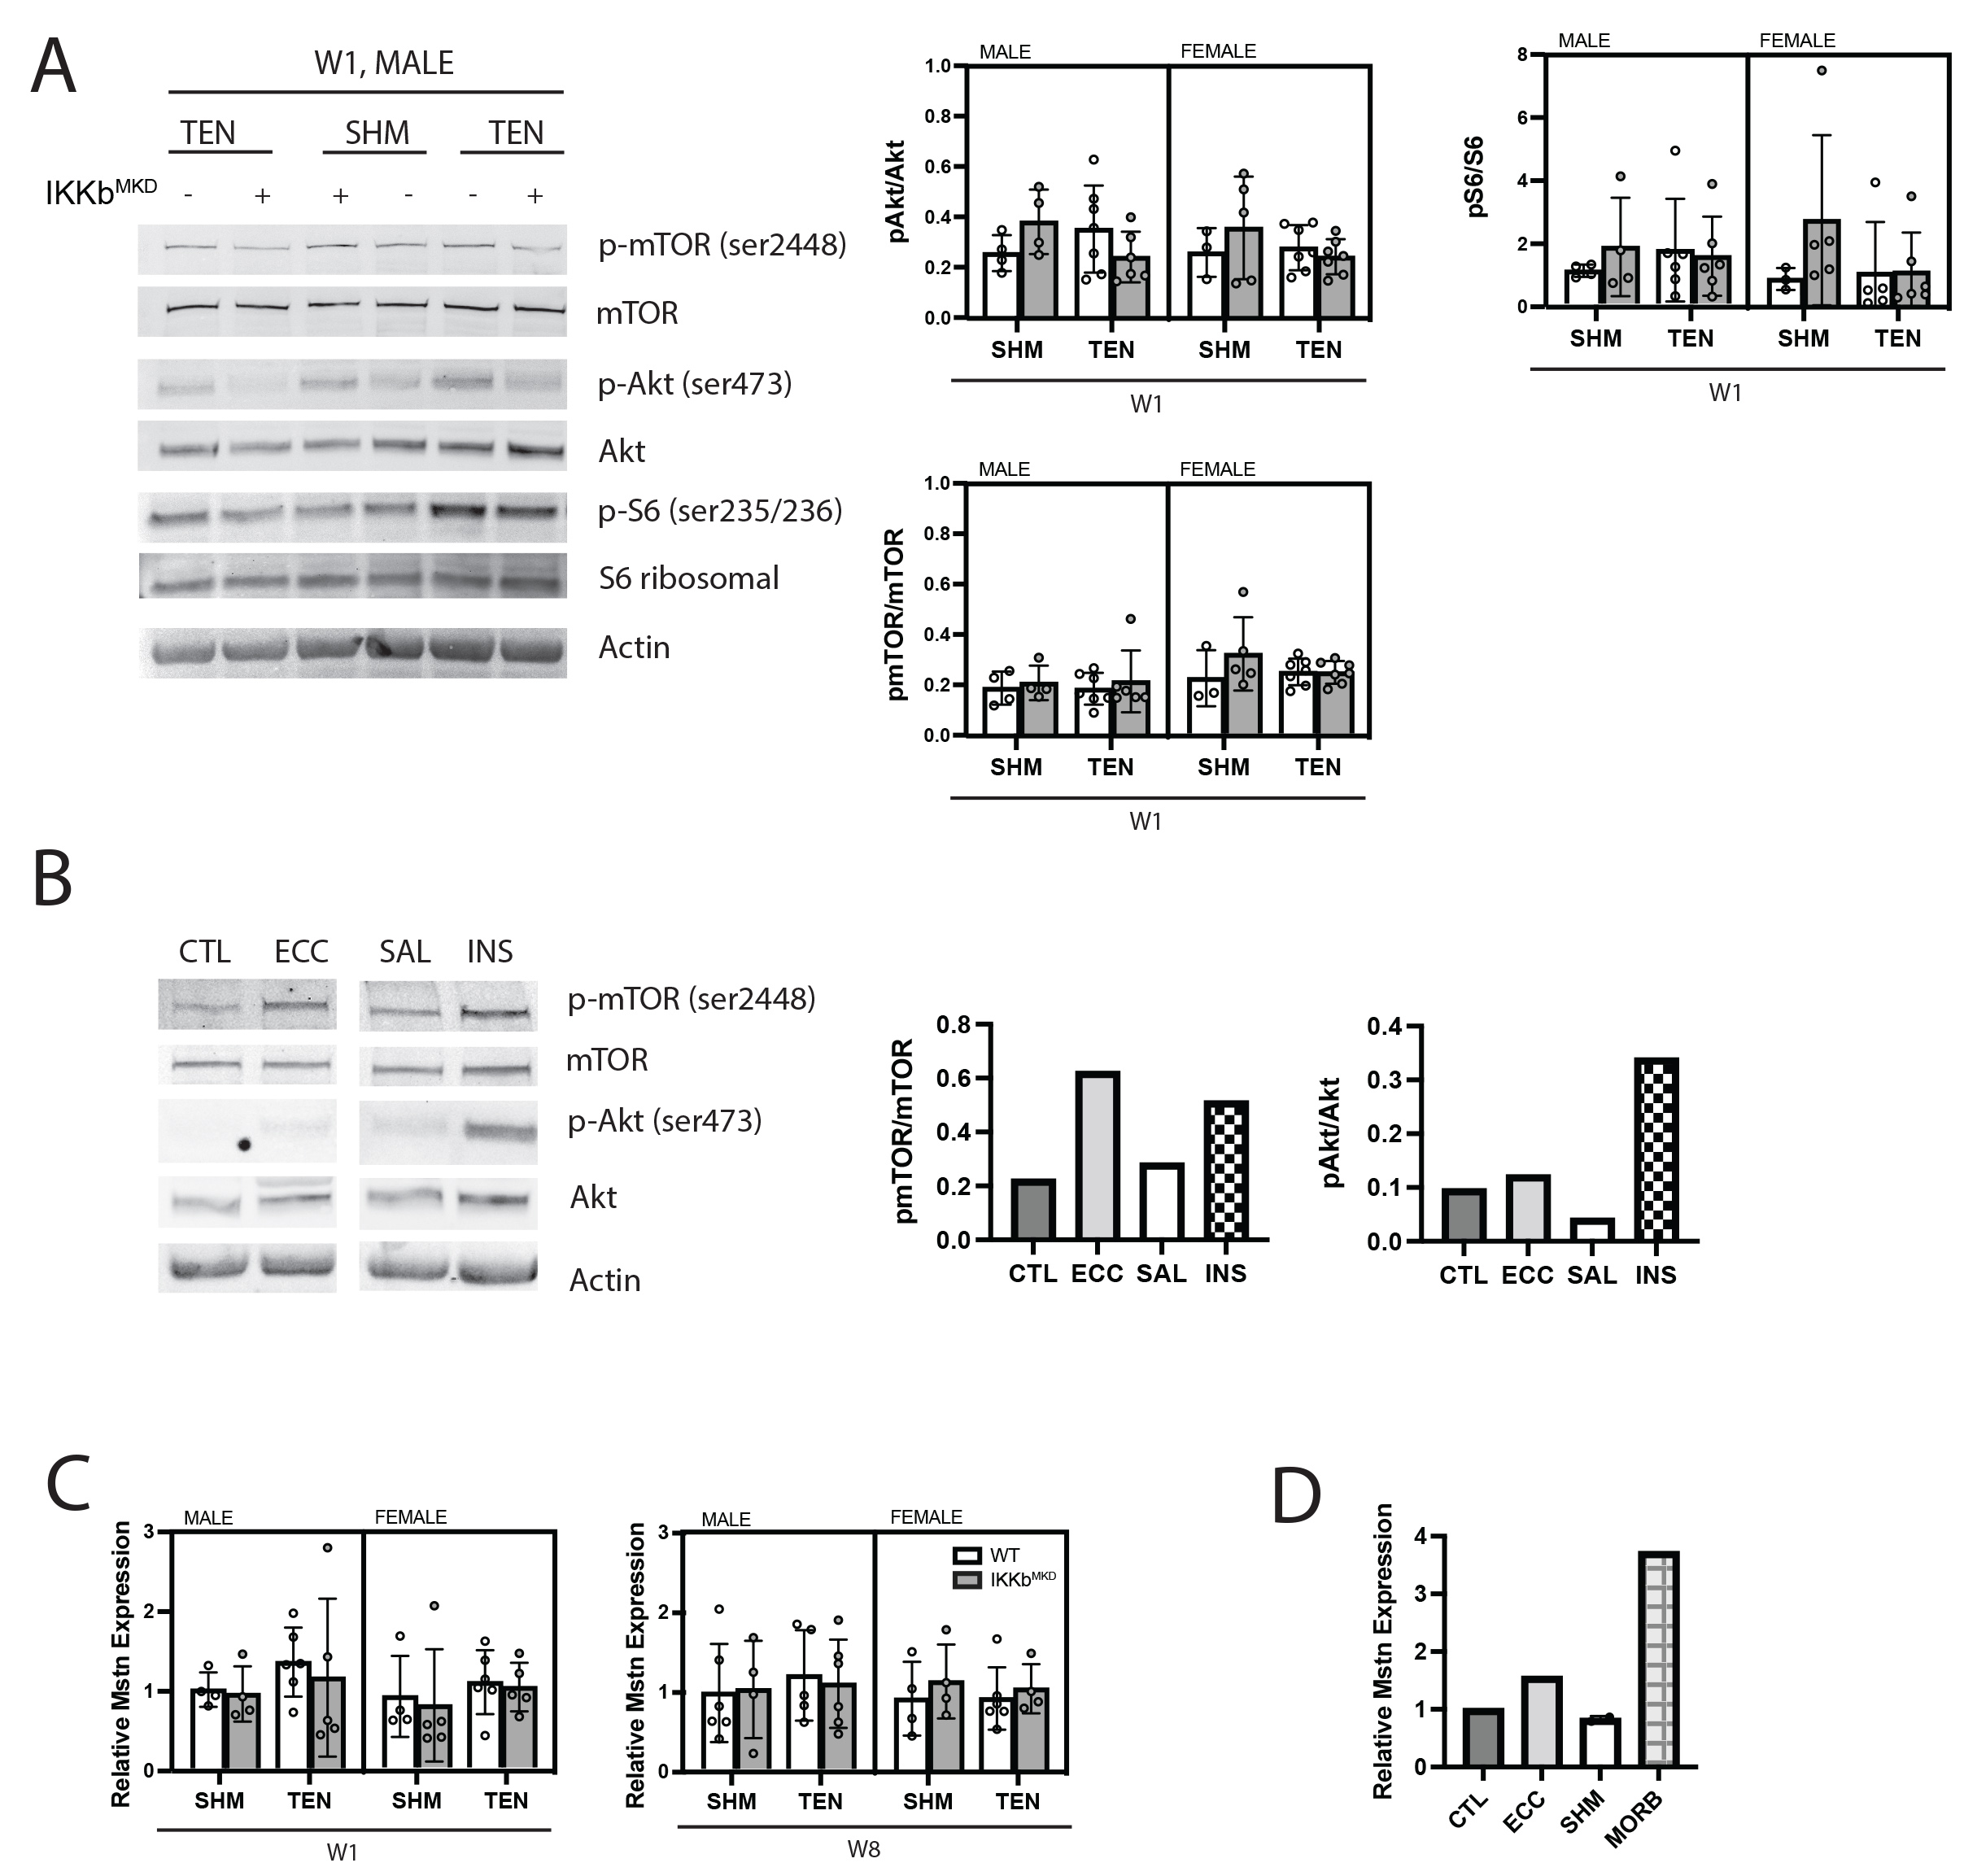

Supplement: supp [file elife-82016-supp-v1.zip › elife_poa_e82016_Figure_7_figure_supplement_1.jpg]

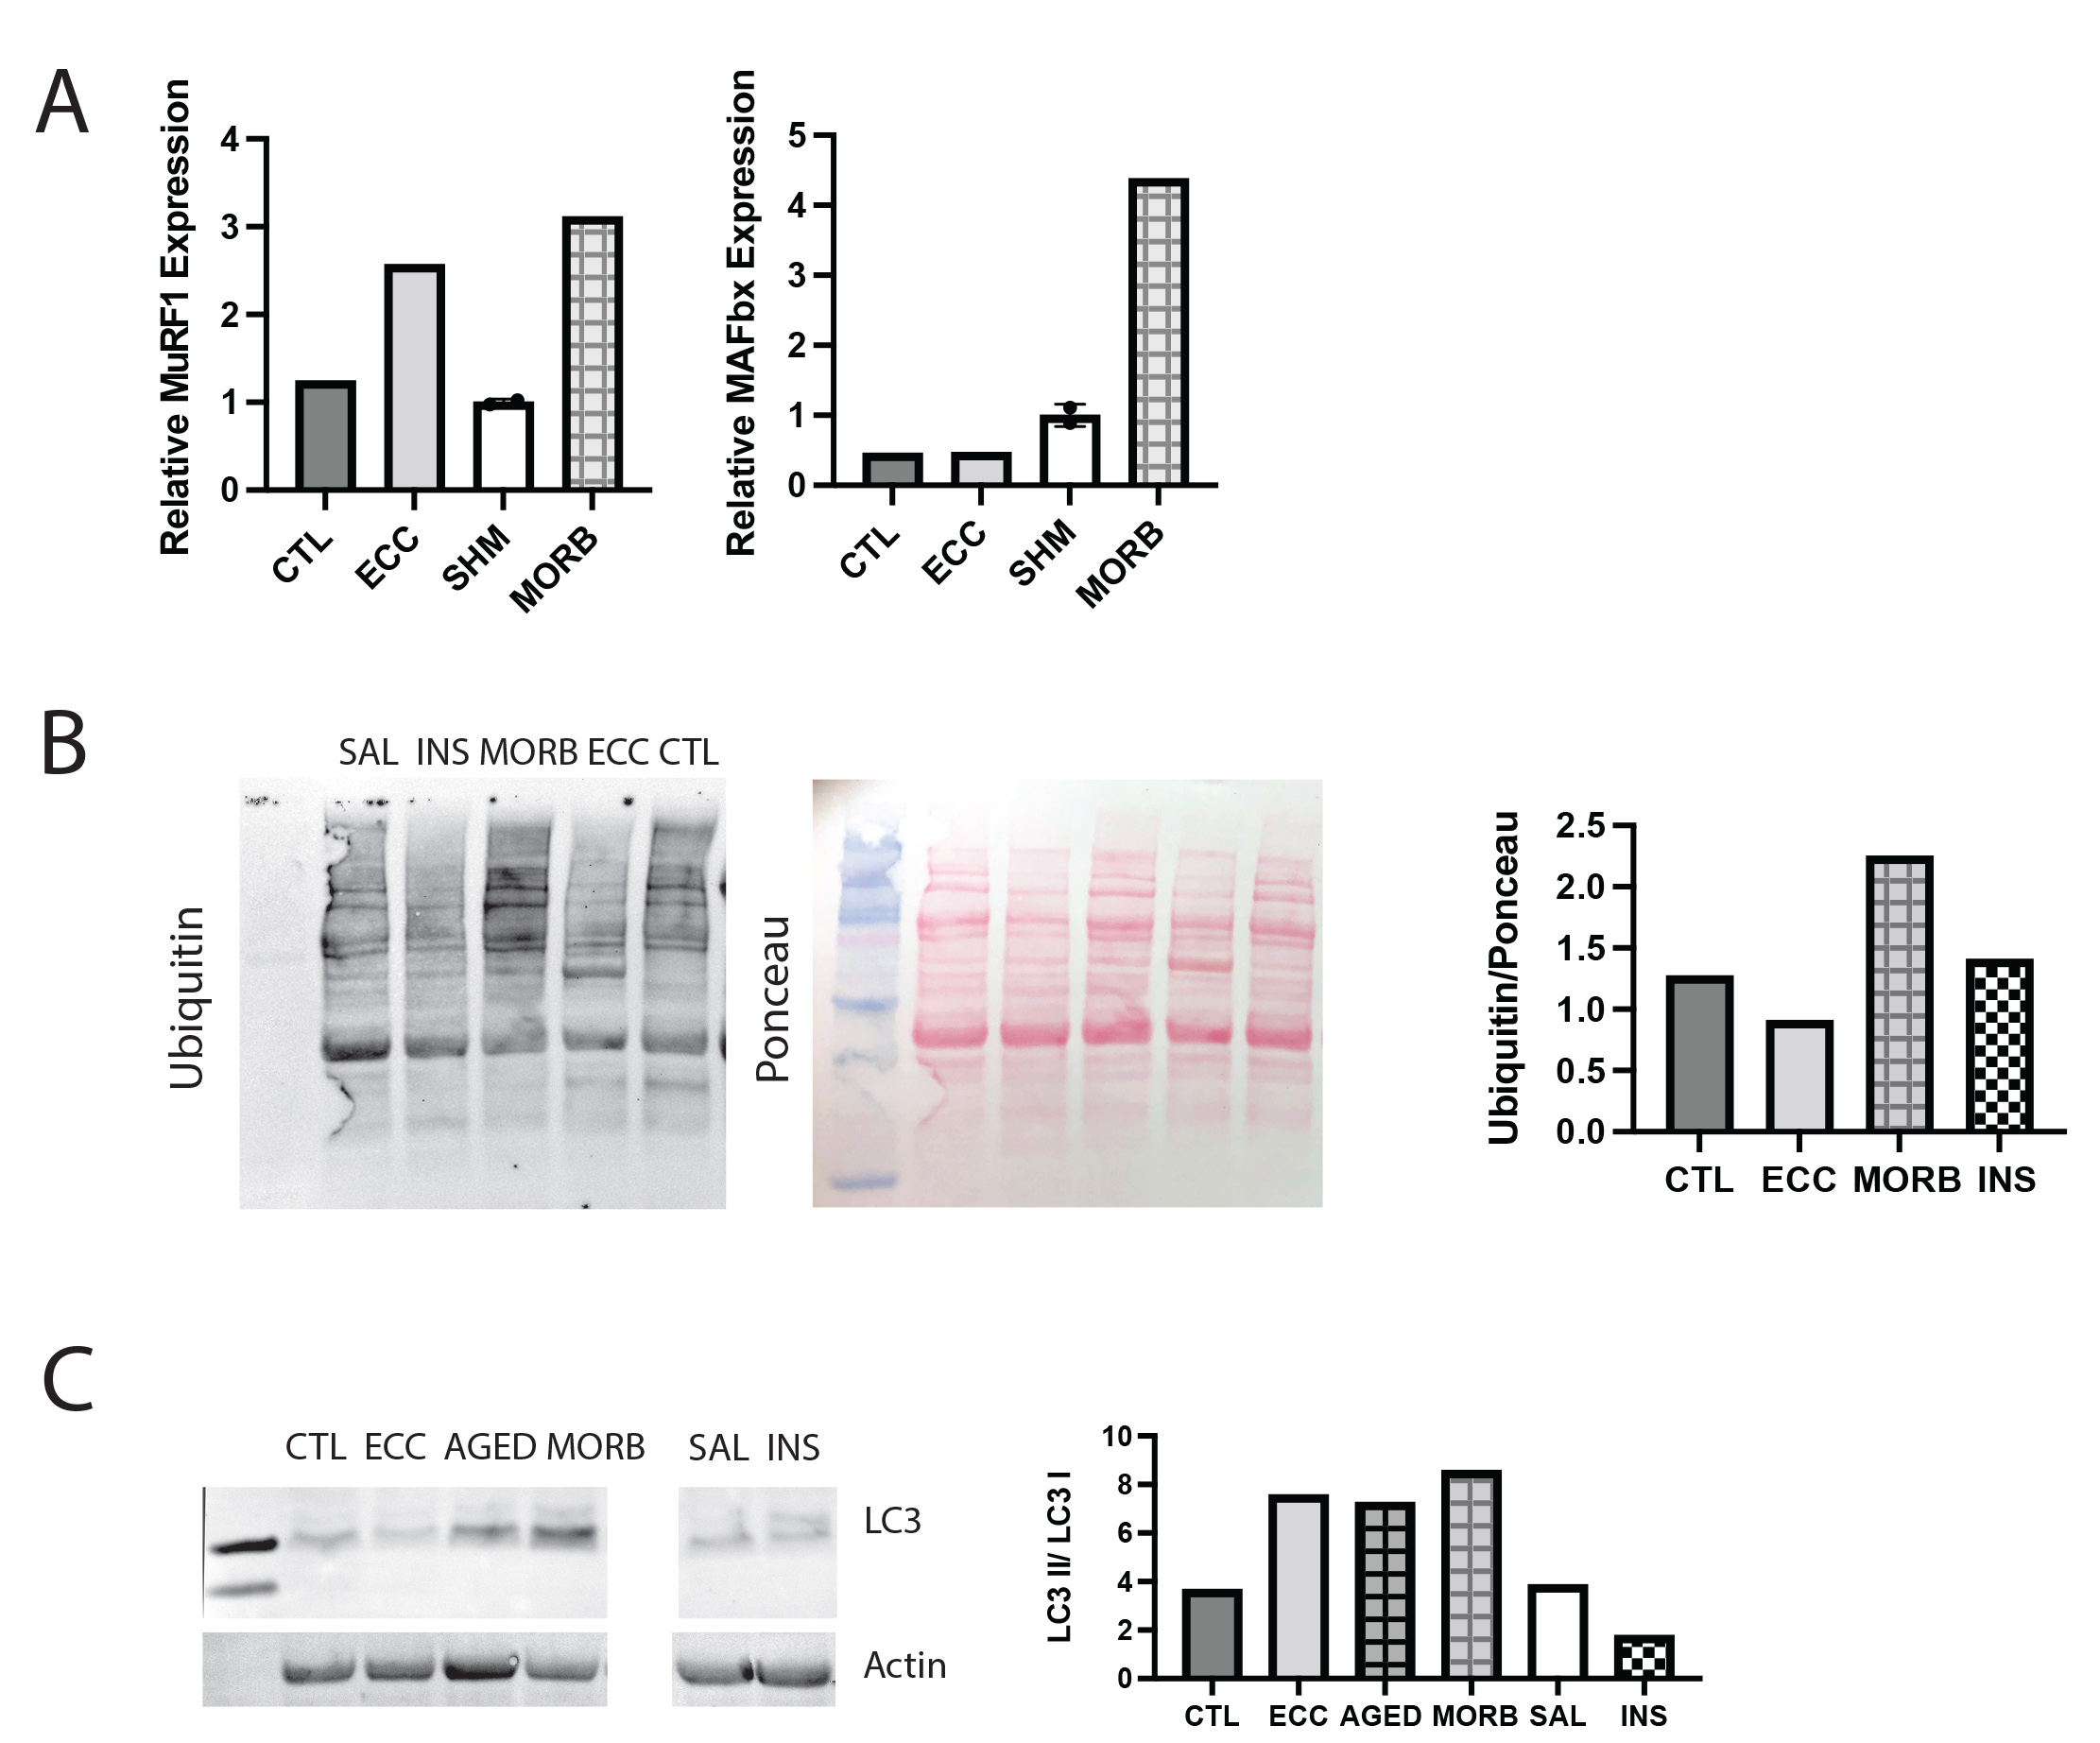

Supplement: supp [file elife-82016-supp-v1.zip › elife_poa_e82016_Figure_7_figure_supplement_2.jpg]
